# Supplementary material for: The Ecological Dynamics of Fecal Contamination and Salmonella Typhi and Salmonella Paratyphi A in Municipal Kathmandu Drinking Water
Source: PLoS Negl Trop Dis. 2016 Jan 6;10(1):e0004346. doi: 10.1371/journal.pntd.0004346 (PMC4703202; doi:10.1371/journal.pntd.0004346)
Supplement: S1 Dataset — . (XLSX) [file pntd.0004346.s007.xlsx]

## Sheet: Sheet1
Source	Site	Week	Month/year	Rainfall (mm)	Sample (+/-)	Colour (Hazen)	Turbidity (NTU)	Conductivity (µS/cm)	Temperature (°C)	pH	Total Hardness (mg/l as CaC03)	Total Alkalinity (mg/l as CaC03)	Chloride (mg/l)	Ammonia (mg/l)	Iron (mg/l)	Nitrite (mg/l as NaNO2)	Nitrate (mg/l as NaNO2)	Arsenic (mg/l)	MPN count	Salmonella Typhi (CT value)	Salmonella Typhi (cfu/ml)	Salmonella Paratyphi A (CT value)	Salmonella Paratyphi A (cfu/ml)
1	Stone Spout	1	2009-05-01	114	+	4.5	1	921	22.1	7.2	170	160	110	0.01	0.11	0.1	46.5	0.004	930	30.47	1165.87	0	0
1	Stone Spout	2	2009-05-01	408.8	+	5	3	946	24.6	7.2	170	176	116.8	0.49	0.001	0.09	3.4	0.004	430	30.84	899.083	35.44	35.5468
1	Stone Spout	3	2009-06-01	169.1	+	5	0.5	918	24.6	6.6	206	200	107.9	0.5	0.17	3.1	70	0.004	22	28.31	5314.35	34.47	70.2506
1	Stone Spout	4	2009-06-01	211.5	+	4.5	0.5	957	24.8	6.9	176	178	110	0.32	0.01	0.04	107	0.004	49	0	0	33.48	140.799
1	Stone Spout	5	2009-06-01	4.2	+	4.5	0.5	968	27.2	7.3	184	180	112.9	0.4	0.05	0.2	99.8	0.004	18	31.27	664.737	35.49	34.3202
1	Stone Spout	6	2009-06-01	198.6	+	4.5	1	976	28	7.1	184	196	117.8	0.28	0.5	0.09	98.6	0.004	920000	32.77	231.82	0	0
1	Stone Spout	7	2009-07-01	312.4	+	4.5	1	969	24.7	6.6	172	180	108.9	0.02	0.05	0.02	81.9	0.004	490	32.18	350.833	36.76	14.067
1	Stone Spout	8	2009-07-01	271.5	+	4.5	0.5	975	26	6.9	176	172	113.9	0.2	0.1	0.06	98	0.004	7.9	33.52	136.899	40	1.44544
1	Stone Spout	9	2009-07-01	160.2	+	4.5	3	973	26	6.8	188	180	113	0.04	0.001	0.06	82	0.004	70	30.04	1576.88	38.56	3.97375
1	Stone Spout	10	2009-07-01	167.8	+	5	4	921	26.3	6.7	180	168	104.9	0.09	0.05	0.08	86.9	0.004	28	32.59	263.057	39.69	1.79701
1	Stone Spout	11	2009-07-01	855.3	+	5	4590	449	24.2	6.5	96	80	44.5	0.56	69	0.2	191.5	0.03	2400000	0	0	0	0
1	Stone Spout	12	2009-08-01	310.8	+	5	3	823	24.3	6.3	178	104	98	0.06	0.03	0.02	116.5	0.004	7.9	27.81	7550.05	36.34	18.893
1	Stone Spout	13	2009-08-01	573	+	4.5	2	741	23.7	6.1	156	90	87.1	0.42	0.001	0.36	124.7	0.004	4.9	33.78	114.051	0	0
1	Stone Spout	14	2009-08-01	616.8	+	4.5	1	746	24.6	6.1	154	100	83.2	0.17	0.11	0.01	118.5	0.004	4.9	32.51	278.259	37.97	6.01381
1	Stone Spout	15	2009-08-01	587.5	+	4.5	0.5	766	24	6.2	164	110	83.2	0.37	0.17	0.01	118.6	0.004	0.08	32.7	243.501	0	0
1	Stone Spout	16	2009-09-01	364.6	+	4.5	0.5	733	27	6.2	160	114	77.2	0.17	0.001	0.01	113	0.004	0.23	34.57	65.4862	37.66	7.47653
1	Stone Spout	17	2009-09-01	301.5	+	4.5	0.5	746	22.8	6.1	160	114	77.2	0.3	1.2	0.01	100.8	0.004	3.3	27.14	12086.5	37.36	9.22996
1	Stone Spout	18	2009-09-01	12.8	+	4.5	0.5	732	25	6.1	166	118	75.2	0.13	0.59	0.01	114.2	0.004	0.01	32.65	252.203	37.76	6.96947
1	Stone Spout	19	2009-09-01	140.3	+	4.5	0.5	793	21.8	6	172	104	83.2	0.17	0.2	0.01	127.3	0.004	0.01	0	0	38.25	4.94026
1	Stone Spout	20	2009-09-01	101.6	+	4.5	0.5	757	22.8	6.3	178	106	85.1	0.87	0.1	0.01	125.1	0.004	0.04	31.97	406.584	36.3	19.4312
1	Stone Spout	21	2009-10-01	533.7	+	4.5	2	775	24	6.1	170	100	85.1	0.24	0.03	0.01	121.4	0.004	0.11	30.8	924.698	36.83	13.3921
1	Stone Spout	22	2009-10-01	3.4	+	4.5	0.5	775	21.8	6	196	106	81.2	0.2	0.001	0.01	108.1	0.004	0.05	34.25	81.9879	35.8	27.6058
1	Stone Spout	23	2009-10-01	0	+	4.5	0.5	757	22.2	5.9	154	86	79.2	0.08	0.09	0.01	117.9	0.004	0.08	32.37	307.008	37.3	9.6272
1	Stone Spout	24	2009-10-01	0	-	ND	ND	ND	ND	ND	ND	ND	ND	ND	ND	ND	ND	ND	ND	ND	ND	ND	ND
1	Stone Spout	25	2009-11-01	0	+	4.5	0.5	761	20	6.2	154	100	81.9	0.08	0.001	0.01	117.1	0.004	0.14	34.92	51.2153	36.51	16.7668
1	Stone Spout	26	2009-11-01	6.3	+	4.5	0.5	771	18.6	6.5	144	102	81.2	0.18	0.001	0.01	108	0.004	0.17	0	0	0	0
1	Stone Spout	27	2009-11-01	0	+	4.5	1	776	18.8	6.3	158	100	82.2	0.18	0.08	0.02	114	0.004	0.02	34.61	63.6722	0	0
1	Stone Spout	28	2009-11-01	0	+	4.5	0.5	774	16.4	6.5	166	104	82.2	0.45	0.06	0.01	113.9	0.004	0.07	35.76	28.3923	0	0
1	Stone Spout	29	2009-12-01	0	+	4.5	0.5	783	16.3	6.5	160	106	84.2	0.04	0.001	0.02	115.1	0.004	0.05	23.02	218223	34.93	50.8569
1	Stone Spout	30	2009-12-01	0	+	4.5	0.5	800	16.4	6.6	172	110	82.2	0.13	0.35	0.01	114.7	0.004	0.01	34.79	56.1113	34.52	67.8266
1	Stone Spout	31	2009-12-01	0	+	4.5	0.5	783	16.1	6.5	172	108	85.1	0.18	0.18	0.04	114.2	0.004	0.01	35.92	25.3746	0	0
1	Stone Spout	32	2009-12-01	0	-	ND	ND	ND	ND	ND	ND	ND	ND	ND	ND	ND	ND	ND	ND	ND	ND	ND	ND
1	Stone Spout	33	2009-12-01	21.6	+	5	0.5	846	14.1	6.7	168	106	90.1	0.17	0.001	0.01	112.9	0.004	0.01	34.98	49.1021	0	0
1	Stone Spout	34	2010-01-01	0	+	4.5	0.5	855	12.4	6.7	182	108	95	0.2	0.001	0.09	122.4	0.004	79	ND	ND	ND	ND
1	Stone Spout	35	2010-01-01	0	+	5	3	979	13.8	6.7	200	188	110.9	3.2	0.23	6.3	81.7	0.004	6300	ND	ND	ND	ND
1	Stone Spout	36	2010-01-01	0	+	5	3	1051	14	6.9	220	228	119.8	6.4	0.47	1.3	66.2	0.004	0.33	ND	ND	ND	ND
1	Stone Spout	37	2010-01-01	0	+	5	0.5	987	14.8	6.8	198	156	114.8	2	0.001	0.79	107.7	0.004	23	29.57	2193.56	32.39	302.726
1	Stone Spout	38	2010-02-01	0	+	4.5	0.5	978	15.1	6.9	192	144	116.8	0.3	0.07	0.21	112.9	0.004	0.13	34.5	68.786	38.19	5.15288
1	Stone Spout	39	2010-02-01	0	+	5	0.5	1010	14.6	7.1	200	144	114.8	0.04	0.24	0.09	110.7	0.004	0.02	0	0	36.87	13.0212
1	Stone Spout	40	2010-02-01	0	+	30	19	1193	13.5	7.3	256	308	145.5	6.1	1.1	7.2	46.3	0.004	2500000	32.99	198.632	38.7	3.60164
1	Stone Spout	41	2010-02-01	0	-	ND	ND	ND	ND	ND	ND	ND	ND	ND	ND	ND	ND	ND	ND	ND	ND	ND	ND
1	Stone Spout	42	2010-03-01	0	+	5	2	1068	19.1	7.4	250	186	128.7	62.8	0.14	0.54	99.1	0.004	0.02	0	0	0	0
1	Stone Spout	43	2010-03-01	0	-	ND	ND	ND	ND	ND	ND	ND	ND	ND	ND	ND	ND	ND	ND	ND	ND	ND	ND
1	Stone Spout	44	2010-03-01	0	-	ND	ND	ND	ND	ND	ND	ND	ND	ND	ND	ND	ND	ND	ND	ND	ND	ND	ND
1	Stone Spout	45	2010-03-01	0	-	ND	ND	ND	ND	ND	ND	ND	ND	ND	ND	ND	ND	ND	ND	ND	ND	ND	ND
1	Stone Spout	46	2010-03-01	0	-	ND	ND	ND	ND	ND	ND	ND	ND	ND	ND	ND	ND	ND	ND	ND	ND	ND	ND
1	Stone Spout	47	2010-04-01	0	-	ND	ND	ND	ND	ND	ND	ND	ND	ND	ND	ND	ND	ND	ND	ND	ND	ND	ND
1	Stone Spout	48	2010-04-01	0	-	ND	ND	ND	ND	ND	ND	ND	ND	ND	ND	ND	ND	ND	ND	ND	ND	ND	ND
1	Stone Spout	49	2010-04-01	0	-	ND	ND	ND	ND	ND	ND	ND	ND	ND	ND	ND	ND	ND	ND	ND	ND	ND	ND
1	Stone Spout	50	2010-04-01	0	-	ND	ND	ND	ND	ND	ND	ND	ND	ND	ND	ND	ND	ND	ND	ND	ND	ND	ND
1	Stone Spout	51	2010-05-01	0	-	ND	ND	ND	ND	ND	ND	ND	ND	ND	ND	ND	ND	ND	ND	ND	ND	ND	ND
1	Stone Spout	52	2010-05-01	0	-	ND	ND	ND	ND	ND	ND	ND	ND	ND	ND	ND	ND	ND	ND	ND	ND	ND	ND
1	Stone Spout	53	2010-05-01	0	+	ND	ND	ND	ND	ND	ND	ND	ND	ND	ND	ND	ND	ND	27	ND	ND	ND	ND
2	Stone Spout	1	2009-05-01	114	+	4.5	0.5	964	22.3	7.2	188	92	133	0.01	0.11	0.22	43.9	0.004	2	32.5	280.221	36.72	14.4677
2	Stone Spout	2	2009-05-01	408.8	+	4.5	2	972	23.6	6.6	190	96	135	0.33	0.001	0.47	50.3	0.004	930	30.56	1094.46	35.96	24.6718
2	Stone Spout	3	2009-06-01	169.1	+	5	0.5	1033	24.6	6.9	206	106	142.6	0.28	0.04	0.34	169.8	0.004	430	30.91	855.953	35.65	30.6726
2	Stone Spout	4	2009-06-01	211.5	+	4.5	0.5	996	24.9	6.8	190	98	132.7	0.33	0.001	0.05	176.6	0.004	180	0	0	38.83	3.28738
2	Stone Spout	5	2009-06-01	4.2	+	4.5	0.5	962	27.1	7.2	198	94	129.7	0.18	0.001	0.1	165.9	0.004	330	31.98	403.738	38.03	5.76567
2	Stone Spout	6	2009-06-01	198.6	+	4.5	0.5	968	28.5	6.9	198	100	130.7	0.23	0.08	0.06	176.2	0.004	70	31.08	759.626	35.11	44.8177
2	Stone Spout	7	2009-07-01	312.4	+	4.5	0.5	1028	24.5	6.8	196	96	134.6	0.05	0.09	0.06	163.2	0.004	460	29.39	2489.14	34.86	53.4195
2	Stone Spout	8	2009-07-01	271.5	+	4.5	3	1043	24.6	6.5	212	100	136.6	1.5	0.09	0.31	193.1	0.004	1300	30.93	844.015	35.58	32.2181
2	Stone Spout	9	2009-07-01	160.2	+	4.5	2	1038	26.1	6.8	196	116	130.7	0.04	0.03	0.07	136.2	0.004	2400000	28.44	4850.65	41.98	0.359832
2	Stone Spout	10	2009-07-01	167.8	+	4.5	2	1049	25.7	6.7	210	100	130.7	0.05	0.39	0.02	174.9	0.004	22000	33.82	110.892	38.32	4.70327
2	Stone Spout	11	2009-07-01	855.3	+	5	20	926	23.9	6	192	64	103.9	1.9	0.3	0.34	185.7	0.004	330	32.89	213.084	42.88	0.191249
2	Stone Spout	12	2009-08-01	310.8	+	5	2	999	24	6.7	198	106	59.4	0.01	0.03	0.01	165.8	0.004	2400000	30.87	880.339	35.69	29.8229
2	Stone Spout	13	2009-08-01	573	+	4.5	0.5	902	24.1	6.4	186	104	104.9	0.33	0.16	0.1	157.1	0.004	11	32.82	223.821	38.15	5.29968
2	Stone Spout	14	2009-08-01	616.8	+	4.5	2	824	24.4	6.2	162	100	86.1	0.29	0.001	0.01	132.5	0.004	23	30.9	861.986	35.37	37.3379
2	Stone Spout	15	2009-08-01	587.5	+	4.5	0.5	775	23.8	6.2	150	98	85.1	0.41	0.51	0.01	116	0.004	7.9	30.5	1141.56	37.09	11.1571
2	Stone Spout	16	2009-09-01	364.6	+	5	0.5	813	26.5	6.5	168	94	87.1	0.3	0.46	0.01	138.7	0.004	17	31.84	445.451	37.92	6.22874
2	Stone Spout	17	2009-09-01	301.5	+	4.5	0.5	843	22.4	6.6	182	96	89.1	0.3	0.001	0.01	133.1	0.004	0.14	32.86	217.621	0	0
2	Stone Spout	18	2009-09-01	12.8	+	4.5	0.5	809	25.1	6.3	162	100	83.2	0.44	0.16	0.01	143	0.004	0.17	34.29	79.7168	0	0
2	Stone Spout	19	2009-09-01	140.3	+	4.5	0.5	775	22.4	6	160	80	97	0.28	0.001	0.01	116.5	0.004	0.01	34.63	62.7841	37.99	5.92994
2	Stone Spout	20	2009-09-01	101.6	+	4.5	0.5	746	24.4	6.5	148	98	86.1	0.13	0.06	0.01	109.3	0.004	2.3	31.64	512.625	34.31	78.605
2	Stone Spout	21	2009-10-01	533.7	+	4.5	2	776	24	6.5	154	98	85.1	0.26	0.17	0.01	117.7	0.004	7	34.7	59.7723	37.37	9.16537
2	Stone Spout	22	2009-10-01	3.4	+	4.5	0.5	820	21.7	6.4	168	100	87.1	0.01	0.09	0.01	119.1	0.004	23	0	0	38.51	4.11576
2	Stone Spout	23	2009-10-01	0	+	4.5	0.5	835	22.2	6.5	168	98	87.1	0.02	0.09	0.01	142.6	0.004	0.08	0	0	37.62	7.68953
2	Stone Spout	24	2009-10-01	0	-	ND	ND	ND	ND	ND	ND	ND	ND	ND	ND	ND	ND	ND	ND	ND	ND	ND	ND
2	Stone Spout	25	2009-11-01	0	+	5	0.5	874	20	6.9	178	98	91.1	0.06	0.001	0.01	137.1	0.004	13	35.21	41.7782	0	0
2	Stone Spout	26	2009-11-01	6.3	+	4.5	0.5	889	18.5	7.4	146	102	101	0.3	0.001	0.02	140.3	0.004	0.22	35.75	28.5924	36.74	14.2659
2	Stone Spout	27	2009-11-01	0	+	4.5	0.5	896	18.7	7.4	174	100	101	0.34	0.22	0.31	143.7	0.004	130	35.68	30.0331	0	0
2	Stone Spout	28	2009-11-01	0	+	4.5	0.5	891	15.9	7.7	174	96	104.9	0.28	0.2	0.01	137.2	0.004	7	25.33	43087.4	36.47	17.2445
2	Stone Spout	29	2009-12-01	0	+	4.5	0.5	888	15.6	7.8	186	94	103.9	0.04	0.08	0.01	138.9	0.004	13	32.99	198.632	36.66	15.0904
2	Stone Spout	30	2009-12-01	0	+	4.5	0.5	904	16.2	7.7	180	98	109.9	0.73	0.001	0.01	128.9	0.004	23	34.3	79.1589	36.25	20.1257
2	Stone Spout	31	2009-12-01	0	-	ND	ND	ND	ND	ND	ND	ND	ND	ND	ND	ND	ND	ND	ND	ND	ND	ND	ND
2	Stone Spout	32	2009-12-01	0	-	ND	ND	ND	ND	ND	ND	ND	ND	ND	ND	ND	ND	ND	ND	ND	ND	ND	ND
2	Stone Spout	33	2009-12-01	21.6	+	5	0.5	942	13.6	7.4	186	98	115.8	0.13	0.25	0.02	127.4	0.004	0.08	33.86	107.82	0	0
2	Stone Spout	34	2010-01-01	0	+	4.5	0.5	927	13.5	7.5	180	102	120.8	0.01	0.18	0.01	128.8	0.004	4.9	ND	ND	ND	ND
2	Stone Spout	35	2010-01-01	0	+	4.5	3	922	13.7	7.8	190	98	117.8	0.06	0.2	0.02	117.1	0.004	0.02	ND	ND	ND	ND
2	Stone Spout	36	2010-01-01	0	+	5	1	928	13.6	7.7	180	100	117.8	0.75	0.23	0.02	125.3	0.004	0.17	ND	ND	ND	ND
2	Stone Spout	37	2010-01-01	0	+	4.5	1	928	13.9	7.9	188	106	119.8	0.08	0.16	0.01	124.3	0.004	0.17	31.98	403.738	36.15	21.5899
2	Stone Spout	38	2010-02-01	0	+	4.5	0.5	913	14.5	7.7	184	98	118.8	0.05	0.11	0.01	124.4	0.004	13	33.68	122.349	0	0
2	Stone Spout	39	2010-02-01	0	+	5	0.5	916	14.4	7.8	180	102	117.8	0.06	0.16	0.03	119.6	0.004	28	33.38	151.043	34.71	59.354
2	Stone Spout	40	2010-02-01	0	+	4.5	0.5	939	12.8	7.7	174	104	122.8	0.04	0.12	0.03	119.3	0.004	13	36.61	15.6297	38.09	5.52777
2	Stone Spout	41	2010-02-01	0	+	ND	ND	ND	ND	ND	ND	ND	ND	ND	ND	ND	ND	ND	11	ND	ND	ND	ND
2	Stone Spout	42	2010-03-01	0	-	ND	ND	ND	ND	ND	ND	ND	ND	ND	ND	ND	ND	ND	ND	ND	ND	ND	ND
2	Stone Spout	43	2010-03-01	0	-	ND	ND	ND	ND	ND	ND	ND	ND	ND	ND	ND	ND	ND	ND	ND	ND	ND	ND
2	Stone Spout	44	2010-03-01	0	-	ND	ND	ND	ND	ND	ND	ND	ND	ND	ND	ND	ND	ND	ND	ND	ND	ND	ND
2	Stone Spout	45	2010-03-01	0	-	ND	ND	ND	ND	ND	ND	ND	ND	ND	ND	ND	ND	ND	ND	ND	ND	ND	ND
2	Stone Spout	46	2010-03-01	0	-	ND	ND	ND	ND	ND	ND	ND	ND	ND	ND	ND	ND	ND	ND	ND	ND	ND	ND
2	Stone Spout	47	2010-04-01	0	-	ND	ND	ND	ND	ND	ND	ND	ND	ND	ND	ND	ND	ND	ND	ND	ND	ND	ND
2	Stone Spout	48	2010-04-01	0	-	ND	ND	ND	ND	ND	ND	ND	ND	ND	ND	ND	ND	ND	ND	ND	ND	ND	ND
2	Stone Spout	49	2010-04-01	0	-	ND	ND	ND	ND	ND	ND	ND	ND	ND	ND	ND	ND	ND	ND	ND	ND	ND	ND
2	Stone Spout	50	2010-04-01	0	-	ND	ND	ND	ND	ND	ND	ND	ND	ND	ND	ND	ND	ND	ND	ND	ND	ND	ND
2	Stone Spout	51	2010-05-01	0	-	ND	ND	ND	ND	ND	ND	ND	ND	ND	ND	ND	ND	ND	ND	ND	ND	ND	ND
2	Stone Spout	52	2010-05-01	0	-	ND	ND	ND	ND	ND	ND	ND	ND	ND	ND	ND	ND	ND	ND	ND	ND	ND	ND
2	Stone Spout	53	2010-05-01	0	-	ND	ND	ND	ND	ND	ND	ND	ND	ND	ND	ND	ND	ND	ND	ND	ND	ND	ND
3	Stone Spout	1	2009-05-01	114	+	5	0.5	646	22.4	6.3	144	94	67.3	0.03	0.05	0.1	44.6	0.004	930	32.3	322.478	36.54	16.4172
3	Stone Spout	2	2009-05-01	408.8	+	4.5	0.5	686	23.8	5.6	142	44	108.9	0.09	0.13	0.01	99.7	0.004	0.03	29.56	2209.02	37.81	6.72899
3	Stone Spout	3	2009-06-01	169.1	+	5	0.5	643	24.6	6.2	150	114	68.3	0.45	0.04	0.17	90.2	0.004	170	28.71	4012.82	35.13	44.1926
3	Stone Spout	4	2009-06-01	211.5	+	4.5	1	640	24.8	6.2	140	100	69.3	0.22	0.05	0.01	113.6	0.004	0.094	31.4	606.736	35.54	33.136
3	Stone Spout	5	2009-06-01	4.2	+	4.5	0.5	643	26.8	6.5	158	94	69.3	0.15	0.001	0.01	111.6	0.004	0.01	30.75	957.745	35.69	29.8229
3	Stone Spout	6	2009-06-01	198.6	+	4.5	0.5	654	28.1	6.5	154	100	70.3	0.12	0.08	0.01	126.4	0.004	4.9	35.95	24.8456	0	0
3	Stone Spout	7	2009-07-01	312.4	+	4.5	0.5	685	24.7	6.1	152	100	67.3	0.01	0.09	0.01	110.9	0.004	0.11	27.24	11266.8	34.83	54.5569
3	Stone Spout	8	2009-07-01	271.5	+	4.5	0.5	693	24.5	6.2	168	96	71.3	0.05	0.41	0.02	132.1	0.004	1.4	29.48	2336.68	35.77	28.1936
3	Stone Spout	9	2009-07-01	160.2	+	4.5	2	704	26	6.1	196	106	69.3	0.01	0.001	0.01	107	0.004	7	34.17	86.7261	42.86	0.193955
3	Stone Spout	10	2009-07-01	167.8	+	4.5	1	700	26	6.2	170	100	72.3	0.06	0.05	0.01	112.7	0.004	0.04	31.73	481.227	40.52	1.00323
3	Stone Spout	11	2009-07-01	855.3	+	5	84	548	24.4	6	134	80	45.5	1.9	1.9	0.9	89.5	0.004	2400000	0	0	0	0
3	Stone Spout	12	2009-08-01	310.8	+	4.5	3	738	24.5	6	170	90	37.6	0.01	0.001	0.01	134.9	0.004	0.34	31.91	424.082	36.03	23.4882
3	Stone Spout	13	2009-08-01	573	+	4.5	1	735	24.2	6.1	174	88	81.2	0.42	0.1	0.03	126.9	0.004	4.9	32.91	210.112	33.12	181.301
3	Stone Spout	14	2009-08-01	616.8	+	4.5	2	788	24.6	6	118	88	85.1	0.3	0.2	0.12	159.2	0.004	0.17	31.43	594.087	34.79	56.1113
3	Stone Spout	15	2009-08-01	587.5	+	4.5	0.5	812	24	6	192	86	77.2	0.65	0.38	0.01	177.8	0.004	23	32.92	208.641	35.53	33.3695
3	Stone Spout	16	2009-09-01	364.6	+	4.5	0.5	819	26.5	6.1	208	94	71.3	0.14	0.001	0.01	190	0.004	0.05	0	0	38.22	5.04545
3	Stone Spout	17	2009-09-01	301.5	+	4.5	0.5	848	22.8	6	196	78	174.2	0.2	0.51	0.01	165.8	0.004	7.9	30.48	1157.71	36.91	12.6605
3	Stone Spout	18	2009-09-01	12.8	+	4.5	0.5	836	25.3	6	200	80	89.1	2.2	0.001	0.01	189	0.004	0.01	29.52	2271.96	35.23	41.1955
3	Stone Spout	19	2009-09-01	140.3	+	4.5	1	849	22.9	5.9	202	80	91.1	0.08	0.001	0.01	180.7	0.004	0.01	33.73	118.127	39.22	2.49977
3	Stone Spout	20	2009-09-01	101.6	+	4.5	0.5	835	24.6	6.1	208	80	81.2	0.79	0.22	0.01	181.4	0.004	2.3	33.96	100.508	37.68	7.37225
3	Stone Spout	21	2009-10-01	533.7	+	5	1	831	24.1	6	202	80	89.1	0.15	0.08	0.01	168.4	0.004	0.12	32.87	216.098	0	0
3	Stone Spout	22	2009-10-01	3.4	+	5	1	840	21.9	6	194	82	91.1	0.01	0.34	0.01	155.1	0.004	0.01	33.76	115.664	0	0
3	Stone Spout	23	2009-10-01	0	+	5	0.5	845	22.4	5.9	196	82	91.1	0.01	0.001	0.01	175.2	0.004	0.02	31.81	454.936	34.15	87.9529
3	Stone Spout	24	2009-10-01	0	-	ND	ND	ND	ND	ND	ND	ND	ND	ND	ND	ND	ND	ND	ND	ND	ND	ND	ND
3	Stone Spout	25	2009-11-01	0	+	5	0.5	856	20.1	6.1	192	80	91.1	0.05	0.21	0.01	168.2	0.004	0.01	31.36	624.022	36.53	16.5329
3	Stone Spout	26	2009-11-01	6.3	+	4.5	1	838	18.8	6.3	192	86	89.1	0.11	0.04	0.01	158.9	0.004	7.9	33.54	134.99	37.54	8.13392
3	Stone Spout	27	2009-11-01	0	+	4.5	0.5	851	18.9	6.3	190	88	89.1	0.18	0.22	0.05	165.3	0.004	0.11	34.53	67.3519	37.76	6.96947
3	Stone Spout	28	2009-11-01	0	+	4.5	0.5	836	16.4	6.3	194	86	88.1	0.01	0.08	0.01	154.6	0.004	0.01	0	0	0	0
3	Stone Spout	29	2009-12-01	0	+	4.5	0.5	835	16.1	6.3	192	90	88.1	0.02	0.001	0.01	158.6	0.004	0.01	34.97	49.4481	39.1	2.71957
3	Stone Spout	30	2009-12-01	0	+	4.5	0.5	830	16.5	6.6	188	84	87.1	0.06	0.2	0.01	139.9	0.004	0.01	33.67	123.211	0	0
3	Stone Spout	31	2009-12-01	0	+	4.5	0.5	816	16.1	6.3	194	86	86.1	0.05	0.18	0.02	158.3	0.004	0.01	35.28	39.7741	37.96	6.0562
3	Stone Spout	32	2009-12-01	0	-	ND	ND	ND	ND	ND	ND	ND	ND	ND	ND	ND	ND	ND	ND	ND	ND	ND	ND
3	Stone Spout	33	2009-12-01	21.6	+	5	0.5	825	14.6	6.5	192	86	86.1	0.02	0.07	0.02	141.4	0.004	0.05	0	0	0	0
3	Stone Spout	34	2010-01-01	0	+	4.5	0.5	794	13.8	6.7	188	84	82.2	0.1	0.12	0.01	141.5	0.004	0.02	ND	ND	ND	ND
3	Stone Spout	35	2010-01-01	0	+	4.5	0.5	797	13.8	7	180	86	84.1	0.01	0.14	0.03	135.7	0.004	0.02	ND	ND	ND	ND
3	Stone Spout	36	2010-01-01	0	+	4.5	0.5	795	14	6.8	184	90	82.2	0.1	0.2	0.01	137	0.004	0.01	ND	ND	ND	ND
3	Stone Spout	37	2010-01-01	0	+	4.5	0.5	784	14.8	7	180	90	81.2	0.04	0.18	0.01	142.7	0.004	0.01	31.53	553.796	35.17	42.9685
3	Stone Spout	38	2010-02-01	0	+	4.5	0.5	782	15.1	7.2	174	84	81.2	0.01	0.001	0.01	145.5	0.004	0.02	31.52	557.699	36.68	14.8799
3	Stone Spout	39	2010-02-01	0	+	4.5	0.5	792	15.2	7.1	178	88	79.2	0.1	0.16	0.06	136.8	0.004	0.001	0	0	36.29	19.5682
3	Stone Spout	40	2010-02-01	0	+	4.5	0.5	768	13.9	6.9	152	84	85.1	0.01	0.22	0.01	147.9	0.004	0.001	34.88	52.6744	40.67	0.902922
3	Stone Spout	41	2010-02-01	0	+	4.5	0.5	770	16.7	6.5	190	86	83.2	0.12	0.22	0.01	149.3	0.004	0.02	35.92	25.3746	0	0
3	Stone Spout	42	2010-03-01	0	+	4.5	0.5	769	19.1	6.9	184	88	83.2	0.09	0.001	0.01	150.2	0.004	0.001	34.66	61.4752	42.83	0.198084
3	Stone Spout	43	2010-03-01	0	+	5	0.5	760	18.9	6.6	176	86	81.2	0.09	0.11	0.01	144.4	0.004	0.02	0	0	0	0
3	Stone Spout	44	2010-03-01	0	+	4.5	0.5	752	20.1	6.7	172	86	80.2	0.09	0.13	0.01	145.2	0.004	4.9	34.19	85.5165	40.17	1.28277
3	Stone Spout	45	2010-03-01	0	+	4.5	0.5	752	23.7	6.3	176	88	80.2	0.08	0.3	0.05	138.6	0.004	0.001	33.59	130.332	39.74	1.735
3	Stone Spout	46	2010-03-01	0	+	4.5	0.5	747	22.4	6.6	176	92	82.2	0.05	0.001	0.01	144.1	0.004	0.05	31.38	615.319	36.73	14.3665
3	Stone Spout	47	2010-04-01	0	+	4.5	0.5	746	23.5	6.7	174	82	84.2	0.1	0.48	0.01	138.5	0.004	0.001	34.77	56.9049	40.81	0.818371
3	Stone Spout	48	2010-04-01	0	+	4.5	0.5	751	24.6	6.2	170	92	81.2	0.07	0.001	0.01	139.4	0.004	0.001	0	0	40.38	1.10688
3	Stone Spout	49	2010-04-01	0	+	4.5	0.5	752	25.2	6	148	74	101.9	0.05	0.54	0.01	143	0.004	2.3	28.54	4521.68	34.09	91.7382
3	Stone Spout	50	2010-04-01	0	+	4.5	0.5	743	24.8	6.2	168	92	84.1	0.05	0.3	0.005	141.2	0.004	0.02	32.94	205.731	39.84	1.61734
3	Stone Spout	51	2010-05-01	0	+	4.5	0.5	766	23.2	6.1	180	86	89.1	0.08	0.001	0.01	144	0.004	0.001	30.22	1389.63	36.68	14.8799
3	Stone Spout	52	2010-05-01	0	+	5	0.5	765	26.5	6.2	176	94	85.1	0.06	0.09	0.01	136.7	0.004	0.001	0	0	0	0
3	Stone Spout	53	2010-05-01	0	+	5	0.5	754	26	6.3	186	94	84.1	0.13	1.5	0.01	137.6	0.004	0.05	33.28	162.032	37.3	9.6272
4	Sunken Well	1	2009-05-01	114	+	75	22	637	22.4	6.2	130	172	21.8	16.9	12.3	0.13	0.01	0.004	0.03	27	13335.2	30.93	844.015
4	Sunken Well	2	2009-05-01	408.8	+	10	13	642	23.9	6.1	128	152	57.4	15	12	0.03	0.01	0.004	0.03	30.66	1020.23	35.13	44.1926
4	Sunken Well	3	2009-06-01	169.1	+	5	50	607	24.7	6.2	128	160	53.5	15	13	0.03	0.7	0.004	0.01	30.36	1259.51	34.46	70.7457
4	Sunken Well	4	2009-06-01	211.5	+	20	60	631	24.8	6.1	132	160	55.4	13.9	10.7	0.1	5.9	0.004	0.01	27.61	8688.6	34.58	65.0279
4	Sunken Well	5	2009-06-01	4.2	+	30	149	619	27.3	6.5	152	168	50.5	14.9	15.3	0.09	3.31	0.004	0.01	30.53	1117.76	34.86	53.4195
4	Sunken Well	6	2009-06-01	198.6	+	4.5	160	585	28.5	6.4	116	140	54.4	11	30.8	0.63	9.3	0.004	0.01	31.52	557.699	36.56	16.1883
4	Sunken Well	7	2009-07-01	312.4	+	30	454	691	24.9	6.3	186	180	53.5	14.7	29.8	0.02	0.32	0.004	0.01	30.27	1341.68	35.95	24.8456
4	Sunken Well	8	2009-07-01	271.5	+	4.5	31	647	25.2	6.2	144	170	54.5	10.4	8.4	0.09	2.12	0.004	0.01	31.86	439.238	36.03	23.4882
4	Sunken Well	9	2009-07-01	160.2	+	10	120	644	26	6.1	168	174	55.4	11.9	14.9	0.03	1.3	0.004	0.05	32.8	226.986	39.08	2.75804
4	Sunken Well	10	2009-07-01	167.8	+	70	42	634	26.2	6.2	130	156	54.4	11.2	8.1	0.52	5.8	0.004	0.02	29.34	2578.1	0	0
4	Sunken Well	11	2009-07-01	855.3	+	5	51	653	24.4	6	140	152	54.4	10.5	14.9	0.4	5	0.004	0.08	34.48	69.759	41.86	0.391471
4	Sunken Well	12	2009-08-01	310.8	+	4.5	24	627	25.1	6.2	136	154	28.7	11	7	0.7	5.9	0.004	0.01	28.95	3390.39	0	0
4	Sunken Well	13	2009-08-01	573	+	5	787	605	24.5	6.4	136	188	53.5	7.5	46.7	0.06	2.5	0.004	0.01	32.44	292.281	37.32	9.49292
4	Sunken Well	14	2009-08-01	616.8	+	5	72	631	24.9	6.2	142	154	57.4	0.86	5.7	0.64	11.9	0.004	0.01	31.83	448.59	35.16	43.2713
4	Sunken Well	15	2009-08-01	587.5	+	5	22	670	24.5	6.1	140	164	55.4	10.7	17.7	0.01	0.52	0.004	0.01	29.22	2804.79	0	0
4	Sunken Well	16	2009-09-01	364.6	+	5	98	629	26.5	6.4	148	168	67.3	9.8	16.3	0.01	0.27	0.004	0.01	32.95	204.291	38.8	3.35738
4	Sunken Well	17	2009-09-01	301.5	+	4.5	33	672	22.9	6.2	138	158	59.4	9.7	10.7	0.08	7.8	0.004	0.13	26.95	13811.8	37.03	11.6372
4	Sunken Well	18	2009-09-01	12.8	+	5	15	645	25.5	6.2	144	178	57.4	10.4	13.7	0.01	0.27	0.004	0.01	0	0	38.35	4.60522
4	Sunken Well	19	2009-09-01	140.3	+	5	138	716	22.9	6.3	166	128	73.3	5.8	5.5	0.72	68.7	0.004	0.01	32.19	348.377	38.31	4.73642
4	Sunken Well	20	2009-09-01	101.6	+	5	197	672	24.6	7.3	122	184	87.1	16.3	26	0.11	1.1	0.004	0.08	0	0	37.09	11.1571
4	Sunken Well	21	2009-10-01	533.7	+	5	97	727	24	7.3	152	186	79.2	9.7	11.2	0.9	20.2	0.004	0.26	33.6	129.42	37.49	8.42461
4	Sunken Well	22	2009-10-01	3.4	+	5	360	723	22	6.7	172	194	71.3	5.7	20.2	0.14	4.6	0.004	0.02	34.43	72.252	36.75	14.1661
4	Sunken Well	23	2009-10-01	0	+	5	115	733	22.6	6.2	168	146	71.3	2.5	9.1	2.5	58.2	0.004	0.09	33.48	140.799	37.49	8.42461
4	Sunken Well	24	2009-10-01	0	-	ND	ND	ND	ND	ND	ND	ND	ND	ND	ND	ND	ND	ND	ND	ND	ND	ND	ND
4	Sunken Well	25	2009-11-01	0	+	5	4	786	20.1	6.3	158	92	85.1	0.1	0.17	<0.02	115.8	0.004	0.08	36.76	14.067	0	0
4	Sunken Well	26	2009-11-01	6.3	+	5	186	639	18.5	6.6	152	138	59.4	4.3	12.5	0.49	32	0.004	3.3	34.99	48.7585	37.54	8.13392
4	Sunken Well	27	2009-11-01	0	+	4.5	687	731	18.5	6.7	172	216	59.4	9.6	41.4	0.02	0.86	0.004	0.01	33.84	109.345	0	0
4	Sunken Well	28	2009-11-01	0	+	5	620	653	16	6.8	154	176	63.4	7.8	62	0.03	8.5	0.004	0.01	0	0	0	0
4	Sunken Well	29	2009-12-01	0	+	5	84	645	16	6.3	142	168	57.4	10	11.3	0.22	2.9	0.004	0.01	32.71	241.796	35.06	46.4195
4	Sunken Well	30	2009-12-01	0	+	4.5	77	639	16.7	6.3	144	166	57.4	10.5	7.5	0.02	2.7	0.004	0.01	34.63	62.7841	0	0
4	Sunken Well	31	2009-12-01	0	+	5	60	635	16	6.1	144	170	55.4	10.4	8.3	0.05	1	0.004	0.01	33.94	101.93	0	0
4	Sunken Well	32	2009-12-01	0	-	ND	ND	ND	ND	ND	ND	ND	ND	ND	ND	ND	ND	ND	ND	ND	ND	ND	ND
4	Sunken Well	33	2009-12-01	21.6	+	5	45	646	14.1	6.1	138	172	56.4	10.4	6.7	0.04	1.2	0.004	0.01	34.41	73.274	37.3	9.6272
4	Sunken Well	34	2010-01-01	0	+	4.5	84	624	13.7	6.2	146	158	57.4	9.6	8.7	0.07	2.3	0.004	0.01
4	Sunken Well	35	2010-01-01	0	+	10	115	637	13.6	6.4	160	172	56.4	11	11.5	0.04	1.6	0.004	0.01
4	Sunken Well	36	2010-01-01	0	+	5	85	634	13.8	6.3	146	160	58.4	10.8	10.3	0.06	2.1	0.004	0.01
4	Sunken Well	37	2010-01-01	0	+	5	88	629	15.1	6.4	122	174	57.4	10.9	7.6	0.07	4.4	0.004	0.14	28.91	3486.98	34.27	80.8444
4	Sunken Well	38	2010-02-01	0	+	5	24	649	15.1	6.3	138	178	57.4	10.8	9	0.07	4.4	0.004	0.01	34.41	73.274	40.61	0.941781
4	Sunken Well	39	2010-02-01	0	+	5	7	656	15.1	6.4	148	170	56.4	9.9	8.9	0.02	0.03	0.004	0.001	33.4	148.936	34.48	69.759
4	Sunken Well	40	2010-02-01	0	+	5	33	636	13.2	6.3	142	162	58.4	10.6	10.4	0.04	1.5	0.004	0.05	0	0	37.95	6.09888
4	Sunken Well	41	2010-02-01	0	+	5	14	630	16.4	6.3	146	192	57.4	10.9	11.4	0.05	0.69	0.004	0.001	36.98	12.0531	0	0
4	Sunken Well	42	2010-03-01	0	+	4.5	290	602	19.3	6.4	108	196	58.4	8.3	70.2	0.07	2.2	0.004	0.001	34.43	72.252	42.27	0.293528
4	Sunken Well	43	2010-03-01	0	+	5	28	658	19.4	6.3	160	186	58.4	10.5	9.3	0.03	1.9	0.004	0.001	34.81	55.3286	42.69	0.21855
4	Sunken Well	44	2010-03-01	0	+	5	20	645	19.7	6.1	122	192	57.4	10.5	8.5	0.06	9.9	0.004	0.02	34.6	64.121	0	0
4	Sunken Well	45	2010-03-01	0	+	5	58	626	24	6	140	174	55.4	10.9	8.7	0.07	4.8	0.004	0.001	35.54	33.136	0	0
4	Sunken Well	46	2010-03-01	0	+	5	17	651	22.5	6	138	180	58.4	11.5	8.2	0.01	12.5	0.004	0.001	0	0	37.9	6.31684
4	Sunken Well	47	2010-04-01	0	+	5	25	623	23.6	6.2	138	198	58.4	11.6	14.6	0.03	1.9	0.004	0.001	36.68	14.8799	0	0
4	Sunken Well	48	2010-04-01	0	+	4.5	23	659	24.4	6.1	134	172	56.4	10.7	10.4	0.03	7.9	0.004	0.001	36.5	16.885	40.45	1.05378
4	Sunken Well	49	2010-04-01	0	+	5	18	640	24.8	6.2	128	178	58.4	11.3	8.8	0.03	4.5	0.004	0.001	33.32	157.543	37.9	6.31684
4	Sunken Well	50	2010-04-01	0	+	5	98	679	24.7	6.2	146	172	59.4	10	18.1	0.06	7.4	0.004	0.001	29.94	1691.61	36.76	14.067
4	Sunken Well	51	2010-05-01	0	+	5	40	663	23.1	6.2	146	168	57.4	10.2	13.5	0.03	5	0.004	0.001	32.49	282.195	40.87	0.784603
4	Sunken Well	52	2010-05-01	0	+	5	43	688	26.2	6.3	148	176	61.4	12.6	22.3	0.21	11.4	0.004	0.001	0	0	39.52	2.02488
4	Sunken Well	53	2010-05-01	0	+	5	40	665	26	6.3	144	164	61.4	11.1	14.4	0.01	5.2	0.004	0.001	32.05	384.37	39.75	1.72286
5	Sunken Well	1	2009-05-01	114	+	4.5	11	748	22.5	6.4	156	90	91.1	1	0.3	0.12	45	0.004	4.3	29.44	2403.26	33.51	137.864
5	Sunken Well	2	2009-05-01	408.8	+	5	15	750	23.5	6.3	148	86	94	0.12	0.7	0.03	107.3	0.004	0.091	30.76	951.043	36.54	16.4172
5	Sunken Well	3	2009-06-01	169.1	+	5	10	721	24.7	6.3	146	98	88.1	0.44	0.32	0.8	100.3	0.004	0.08	0	0	0	0
5	Sunken Well	4	2009-06-01	211.5	+	4.5	8	760	24.6	6.3	156	96	95	0.45	0.49	0.4	113.2	0.004	220	34.7	59.7723	35.49	34.3202
5	Sunken Well	5	2009-06-01	4.2	+	5	7	766	27.3	6.5	164	90	97	0.23	0.17	0.09	116.5	0.004	0.01	31.79	461.371	37.01	11.8018
5	Sunken Well	6	2009-06-01	198.6	+	4.5	6	777	28.5	6.5	172	98	97	0.3	0.7	0.03	120	0.004	110	34.42	72.7612	36.05	23.1606
5	Sunken Well	7	2009-07-01	312.4	+	4.5	12	797	24.8	6.4	180	98	99	0.2	0.42	0.03	117.4	0.004	230	32.54	272.458	36.69	14.7758
5	Sunken Well	8	2009-07-01	271.5	+	4.5	10	810	25.1	6.3	188	98	103	0.11	0.2	0.02	150.6	0.004	28	0	0	40	1.44544
5	Sunken Well	9	2009-07-01	160.2	+	4.5	8	817	26	6.3	182	102	10	0.01	0.3	0.07	92.5	0.004	0.17	33.82	110.892	0	0
5	Sunken Well	10	2009-07-01	167.8	+	5	13	817	25.1	6.3	170	92	92	0.05	0.24	0.05	116.6	0.004	7.9	31.51	561.63	0	0
5	Sunken Well	11	2009-07-01	855.3	+	5	9	577	24.3	6.6	114	70	69.3	0.22	0.19	0.1	73.2	0.004	9400	34.81	55.3286	0	0
5	Sunken Well	12	2009-08-01	310.8	+	4.5	7	776	24.8	6.4	168	92	47.5	0.56	0.08	0.02	110.7	0.004	22	30.08	1533.2	35.33	38.4017
5	Sunken Well	13	2009-08-01	573	+	5	5	717	24.1	6.3	150	86	41.6	0.61	0.05	0.67	109.6	0.004	130	33.83	110.116	36.46	17.366
5	Sunken Well	14	2009-08-01	616.8	+	5	3	719	24.8	6.2	148	88	83.2	0.23	0.07	0.01	108.5	0.004	17	31.13	733.415	36.34	18.893
5	Sunken Well	15	2009-08-01	587.5	+	4.5	3	797	24	6.2	166	102	87.1	0.67	0.21	0.02	127.3	0.004	0.14	32.35	311.351	37.43	8.78719
5	Sunken Well	16	2009-09-01	364.6	+	4.5	2	765	26.6	6.5	168	112	53.5	0.23	0.27	0.01	118.7	0.004	33	30.81	918.227	36.91	12.6605
5	Sunken Well	17	2009-09-01	301.5	+	5	3	773	22.6	6.3	160	108	79.2	0.27	0.001	0.04	107.4	0.004	330	30.15	1459.65	37.09	11.1571
5	Sunken Well	18	2009-09-01	12.8	+	4.5	2	773	25.6	6.2	160	104	79.2	0.66	0.11	0.01	130.5	0.004	49	35.46	35.051	39.67	1.82243
5	Sunken Well	19	2009-09-01	140.3	+	4.5	3	795	23.4	6.2	168	104	81.2	0.44	0.01	0.02	138.4	0.004	0.05	33.62	127.614	35.94	25.0207
5	Sunken Well	20	2009-09-01	101.6	+	4.5	1	787	24.6	6.4	170	100	84.1	0.13	0.06	0.02	128.4	0.004	0.22	32.44	292.281	37.29	9.69505
5	Sunken Well	21	2009-10-01	533.7	+	4.5	2	789	24	6.3	168	94	85.1	0.24	0.03	0.02	141	0.004	0.34	32.68	246.945	0	0
5	Sunken Well	22	2009-10-01	3.4	+	5	4	816	22.1	6.3	174	94	89.1	0.03	0.09	0.01	130	0.004	22	28.15	5946.34	0	0
5	Sunken Well	23	2009-10-01	0	+	5	1	793	22.9	6.2	164	92	87.1	0.02	0.11	0.02	133.7	0.004	110	33.67	123.211	37.87	6.45134
5	Sunken Well	24	2009-10-01	0	-	ND	ND	ND	ND	ND	ND	ND	ND	ND	ND	ND	ND	ND	ND	ND	ND	ND	ND
5	Sunken Well	25	2009-11-01	0	+	5	4	786	20.1	6.3	158	92	85.1	0.1	0.17	0.01	115.8	0.004	0.22	36.25	20.1257	35.82	27.2207
5	Sunken Well	26	2009-11-01	6.3	+	5	2	763	18.9	6.5	154	96	83.2	0.24	0.001	0.01	114.5	0.004	4.6	35.58	32.2181	37.29	9.69505
5	Sunken Well	27	2009-11-01	0	+	4.5	3	768	19.3	6.6	156	94	84.1	0.72	0.13	0.07	118	0.004	17	34.21	84.3238	38.63	3.78312
5	Sunken Well	28	2009-11-01	0	+	4.5	2	741	16.5	6.5	152	96	83.2	0.02	0.06	0.01	107	0.004	0.17	34.46	70.7457	32.03	389.807
5	Sunken Well	29	2009-12-01	0	+	5	3	741	16.3	6.5	154	96	83.2	0.05	0.16	0.01	106.8	0.004	0.01	33.94	101.93	0	0
5	Sunken Well	30	2009-12-01	0	+	4.5	1	731	16.6	6.3	150	72	82.2	0.16	0.53	0.01	94.9	0.004	0.01	41.22	0.613621	36.87	13.0212
5	Sunken Well	31	2009-12-01	0	+	5	2	740	16	6.4	148	94	82.2	0.32	0.13	0.05	101.2	0.004	23	0	0	0	0
5	Sunken Well	32	2009-12-01	0	-	ND	ND	ND	ND	ND	ND	ND	ND	ND	ND	ND	ND	ND	ND	ND	ND	ND	ND
5	Sunken Well	33	2009-12-01	21.6	+	4.5	2	752	14	6.3	158	90	80.2	0.02	0.07	0.01	100.7	0.004	7	35.99	24.1574	0	0
5	Sunken Well	34	2010-01-01	0	+	5	1	756	13.2	6.3	168	82	92.1	0.2	0.21	0.02	99.5	0.004	0.09	ND	ND	ND	ND
5	Sunken Well	35	2010-01-01	0	+	4.5	1	744	14.2	6.5	148	94	82.2	0.12	0.14	0.03	100.7	0.004	0.01	ND	ND	ND	ND
5	Sunken Well	36	2010-01-01	0	+	5	2	766	14.1	6.5	160	94	86.1	0.19	0.23	0.01	104.7	0.004	0.01	ND	ND	ND	ND
5	Sunken Well	37	2010-01-01	0	+	5	6	778	15.2	6.7	178	96	86.1	0.1	0.16	0.01	119	0.004	0.09	29.73	1960.42	34.58	65.0279
5	Sunken Well	38	2010-02-01	0	+	4.5	5	794	15.1	6.5	170	94	89.1	0.04	0.22	0.01	116.9	0.004	31	0	0	0	0
5	Sunken Well	39	2010-02-01	0	+	5	4	796	15.1	6.6	166	90	87.1	0.4	0.16	0.02	115.6	0.004	0.001	32.63	255.77	35.99	24.1574
5	Sunken Well	40	2010-02-01	0	+	4.5	5	770	13.3	6.4	164	86	88.1	0.12	0.34	0.01	123.1	0.004	0.001	34.75	57.7099	38.75	3.47736
5	Sunken Well	41	2010-02-01	0	+	4.5	4	769	16.6	6.4	180	86	93.1	0.15	0.13	0.03	120.2	0.004	0.001	0	0	40.97	0.731392
5	Sunken Well	42	2010-03-01	0	+	4.5	0.5	770	19.2	7.2	164	168	59.1	0.03	0.22	0.03	129.4	0.004	0.001	33.81	111.673	39.88	1.57253
5	Sunken Well	43	2010-03-01	0	+	5	16	778	19.7	6.4	166	84	94	0.13	0.68	0.02	127	0.004	0.05	34.45	71.2443	39.56	1.96879
5	Sunken Well	44	2010-03-01	0	+	5	5	795	19.8	6.4	172	88	94	0.2	0.32	0.04	130.4	0.004	220	34.92	51.2153	40.49	1.02459
5	Sunken Well	45	2010-03-01	0	+	4.5	3	828	23.4	6.4	176	96	98	0.29	0.39	0.03	122.2	0.004	0.17	35.57	32.4452	0	0
5	Sunken Well	46	2010-03-01	0	+	5	10	841	22.7	6.4	204	104	100.9	0.16	0.55	0.2	129.8	0.004	17	38.43	4.35361	0	0
5	Sunken Well	47	2010-04-01	0	+	4.5	6	847	23.4	6.6	196	106	102.9	0.32	0.72	0.08	126.8	0.004	0.17	36.61	15.6297	42.73	0.212496
5	Sunken Well	48	2010-04-01	0	+	4.5	8	871	23.2	7.1	186	108	103.9	1.2	0.28	0.07	124.3	0.004	46	32.94	205.731	0	0
5	Sunken Well	49	2010-04-01	0	-	ND	ND	ND	ND	ND	ND	ND	ND	ND	ND	ND	ND	ND	ND	ND	ND	ND	ND
5	Sunken Well	50	2010-04-01	0	+	5	41	888	24.8	6.6	194	120	111.8	0.2	1.9	0.03	129.1	0.004	3.3	31.92	421.114	0	0
5	Sunken Well	51	2010-05-01	0	+	4.5	3	783	23.2	6.4	146	72	100.9	0.14	0.05	0.01	129.6	0.004	0.001	30.32	1295.39	37.7	7.26942
5	Sunken Well	52	2010-05-01	0	+	5	5	796	26.5	6.4	154	176	94.1	0.97	0.12	0.01	126.35	0.004	130	0	0	35.72	29.2012
5	Sunken Well	53	2010-05-01	0	+	4.5	3	799	26	6.4	172	84	101.9	0.19	0.2	0.01	124.5	0.004	0.05	33.82	110.892	38.9	3.12968
6	Sunken Well	1	2009-05-01	114	+	5	6	1627	22.6	6.9	252	326	168.3	0.44	0.81	0.3	41	0.004	0.062	26.5	18945.2	30.95	832.243
6	Sunken Well	2	2009-05-01	408.8	+	5	17	1632	23.4	6.8	250	334	174.3	1.7	0.55	0.33	156.4	0.004	0.03	28.92	3462.58	0	0
6	Sunken Well	3	2009-06-01	169.1	-	ND	ND	ND	ND	ND	ND	ND	ND	ND	ND	ND	ND	ND	ND	ND	ND	ND	ND
6	Sunken Well	4	2009-06-01	211.5	+	4.5	6	1629	24.8	6.7	252	348	166.3	2.3	0.12	0.4	175.6	0.004	49	36.56	16.1883	0	0
6	Sunken Well	5	2009-06-01	4.2	+	10	7	1623	27.2	7.1	266	354	170.3	1.91	0.24	0.94	180.1	0.004	17	31.55	546.072	40	1.44544
6	Sunken Well	6	2009-06-01	198.6	+	4.5	2	276	28.5	7.4	110	126	10.9	0.05	0.81	0.01	1.51	0.004	0.01	0	0	37.68	7.37225
6	Sunken Well	7	2009-07-01	312.4	+	5	11	1694	24.8	6.7	260	362	170.3	0.8	0.23	0.84	170.6	0.004	33	30.25	1360.66	34.79	56.1113
6	Sunken Well	8	2009-07-01	271.5	+	5	5	1708	24.4	6.8	280	374	168.3	0.45	0.001	1.32	207.1	0.004	2.3	32	398.107	36.06	22.9985
6	Sunken Well	9	2009-07-01	160.2	+	5	7	1714	26	6.8	276	370	160.4	1.2	0.27	0.55	141.2	0.004	2400000	33.53	135.941	38.38	4.50921
6	Sunken Well	10	2009-07-01	167.8	+	5	7	1680	24.4	6.9	280	360	163.3	0.5	0.05	0.44	163.7	0.004	7.9	31.85	442.334	37.8	6.77642
6	Sunken Well	11	2009-07-01	855.3	+	5	6	1482	24.3	6.8	226	308	139.6	0.91	0.001	0.6	143.6	0.004	330	32.86	217.621	38.63	3.78312
6	Sunken Well	12	2009-08-01	310.8	+	4.5	6	1653	24.9	6.9	266	326	83.2	1.5	0.11	0.89	159	0.004	9.4	0	0	0	0
6	Sunken Well	13	2009-08-01	573	+	5	3	1658	24.2	6.6	274	364	166.3	1.6	0.19	0.81	169.4	0.004	280	31.78	464.622	37.35	9.29501
6	Sunken Well	14	2009-08-01	616.8	+	5	2	1632	24.7	6.7	262	366	164	3	0.04	0.24	159.2	0.004	46	30.37	1250.69	35.66	30.4579
6	Sunken Well	15	2009-08-01	587.5	+	5	3	1648	24.1	6.6	270	362	158.4	2.1	1.02	0.14	156.1	0.004	0.17	31.55	546.072	36.34	18.893
6	Sunken Well	16	2009-09-01	364.6	+	5	0.5	1589	26.6	6.8	258	380	154.4	2.5	0.68	0.19	131.2	0.004	7.9	31.9	427.071	0	0
6	Sunken Well	17	2009-09-01	301.5	+	5	3	1630	22.7	6.7	260	376	154.4	2.3	0.15	0.2	125.6	0.004	2800	32.55	270.552	37.13	10.848
6	Sunken Well	18	2009-09-01	12.8	+	5	2	1578	25.8	6.6	256	348	45.5	4.7	13.5	0.13	152	0.004	4.9	32.97	201.442	38.17	5.22577
6	Sunken Well	19	2009-09-01	140.3	+	5	2	1599	23.1	6.6	262	342	148.5	3.1	0.19	0.11	156.1	0.004	0.17	33.23	167.822	36.26	19.9848
6	Sunken Well	20	2009-09-01	101.6	+	4.5	1	1567	24.6	6.8	258	340	153.5	4.1	0.19	0.15	154	0.004	9.4	32.68	246.945	33.45	143.797
6	Sunken Well	21	2009-10-01	533.7	+	5	3	1606	24	6.7	264	346	152.5	3.7	0.08	1.4	153.8	0.004	0.43	34.2	84.918	33.79	113.253
6	Sunken Well	22	2009-10-01	3.4	+	5	2	1639	22.3	6.7	256	344	158.4	3.3	0.001	0.07	147.8	0.004	17	0	0	37.28	9.76338
6	Sunken Well	23	2009-10-01	0	+	5	1	1640	22.9	6.5	262	340	158.4	4.6	0.001	0.17	170.1	0.004	46	30.72	978.138	34.54	66.8806
6	Sunken Well	24	2009-10-01	0	-		ND	ND	ND	ND	ND	ND	ND	ND	ND	ND	ND	ND	ND	ND	ND	ND	ND
6	Sunken Well	25	2009-11-01	0	+	5	2	1712	20.1	6.7	260	344	160.4	4.6	0.82	0.27	168.2	0.004	0.34	36.51	16.7668	0	0
6	Sunken Well	26	2009-11-01	6.3	+	5	5	1693	19.7	6.9	262	348	160.4	4.3	40.01	0.14	170.6	0.004	23	36.81	13.5816	36.41	17.9866
6	Sunken Well	27	2009-11-01	0	+	4.5	3	1770	19.1	6.9	278	354	166.3	5.7	0.36	0.25	197	0.004	0.11	0	0	36.63	15.4117
6	Sunken Well	28	2009-11-01	0	+	5	4	1742	16.6	6.9	270	320	171.3	3.5	0.001	0.79	202.6	0.004	0.14	37.28	9.76338	36.69	14.7758
6	Sunken Well	29	2009-12-01	0	+	5	8	1752	16.1	7	276	332	175.2	1.6	0.66	2.8	215.9	0.004	2.3	33.96	100.508	36.92	12.5719
6	Sunken Well	30	2009-12-01	0	+	7	4	1739	16.7	6.9	270	320	175.2	3.3	0.57	1.5	195.2	0.004	13	32.4	300.608	39.12	2.68164
6	Sunken Well	31	2009-12-01	0	+	5	2	1735	16	6.9	270	324	171.3	1.7	0.31	1.4	201.5	0.004	35	33.87	107.066	37.76	6.96947
6	Sunken Well	32	2009-12-01	0	-	ND	ND	ND	ND	ND	ND	ND	ND	ND	ND	ND	ND	ND	ND	ND	ND	ND	ND
6	Sunken Well	33	2009-12-01	21.6	+	5	0.5	1753	13.9	6.6	262	320	167.3	2.2	2.6	0.67	194.5	0.004	0.02	39.08	2.75804	0	0
6	Sunken Well	34	2010-01-01	0	+	5	2	1745	12.5	7.1	266	310	175.2	1.6	0.09	0.47	193.6	0.004	0.02	ND	ND	ND	ND
6	Sunken Well	35	2010-01-01	0	+	5	4	1730	14.6	7.1	272	320	169.3	1.4	0.3	0.59	190.6	0.004	2.3	ND	ND	ND	ND
6	Sunken Well	36	2010-01-01	0	+	5	3	1744	14.2	7	268	318	173.2	1.5	0.23	0.36	203.2	0.004	0.08	ND	ND	ND	ND
6	Sunken Well	37	2010-01-01	0	+	5	4	1739	15.3	7.4	258	324	171.3	1	0.08	0.34	201.9	0.004	0.01	29.45	2386.44	34.57	65.4862
6	Sunken Well	38	2010-02-01	0	+	5	2	1735	15.3	7.2	272	336	174	1.5	0.07	0.31	196.3	0.004	0.01	34.15	87.9529	0	0
6	Sunken Well	39	2010-02-01	0	+	5	4	1775	15.3	7.1	272	328	171.3	1.4	0.44	0.26	191.5	0.004	0.001	32.54	272.458	35.47	34.8057
6	Sunken Well	40	2010-02-01	0	+	5	2	1716	13.8	7	292	334	176.2	0.97	0.19	0.29	202.8	0.004	2.3	34.84	54.1751	37.7	7.26942
6	Sunken Well	41	2010-02-01	0	+	4.5	2	1691	16.8	7	270	318	172.3	0.62	0.07	0.59	212.9	0.004	0.02	36.67	14.9848	38.29	4.80341
6	Sunken Well	42	2010-03-01	0	+	5	4	1704	19.3	7.2	276	352	176.2	1	0.14	0.3	258.5	0.004	0.02	35.89	25.9149	0	0
6	Sunken Well	43	2010-03-01	0	+	4.5	3	1698	19.7	7	274	328	173.3	0.66	0.25	0.37	221.2	0.004	0.001	0	0	41.96	0.364922
6	Sunken Well	44	2010-03-01	0	+	5	8	1716	19.7	6.9	262	338	177.2	2.4	0.15	0.51	212.3	0.004	0.08	35.48	34.5621	0	0
6	Sunken Well	45	2010-03-01	0	+	5	2	1723	24.3	6.9	268	340	178	1.8	0.08	0.55	196.4	0.004	0.14	36.41	17.9866	42.34	0.279447
6	Sunken Well	46	2010-03-01	0	+	4.5	4	1714	22.7	6.9	274	342	172.3	0.86	0.17	0.01	197.6	0.004	0.13	0	0	0	0
6	Sunken Well	47	2010-04-01	0	+	5	4	1673	23.7	7.2	268	334	170.3	0.45	0.21	0.32	207.2	0.004	28	0	0	33.65	124.954
6	Sunken Well	48	2010-04-01	0	+	5	3	1727	24.4	6.8	264	356	176.2	0.55	0.001	0.72	210.9	0.004	2.3	0	0	38.04	5.72532
6	Sunken Well	49	2010-04-01	0	+	5	4	1682	24.7	7.1	260	348	178.2	0.52	0.35	0.17	222.8	0.004	0.08	30.9	861.986	35.01	48.0784
6	Sunken Well	50	2010-04-01	0	+	4.5	2	1705	25	6.8	272	358	179.2	0.76	1.5	0.48	190.1	0.004	33	30.6	1064.14	37.5	8.36566
6	Sunken Well	51	2010-05-01	0	+	5	7	1709	23.3	6.6	288	356	83.2	1.2	0.15	0.17	215.4	0.004	0.02	32.37	307.008	38.37	4.54098
6	Sunken Well	52	2010-05-01	0	+	4.5	0.5	1706	26.4	6.7	268	350	172.3	0.69	1.2	0.28	202.6	0.004	0.001	0	0	38.86	3.21884
6	Sunken Well	53	2010-05-01	0	+	4.5	3	1698	25.9	6.8	272	346	172.3	0.86	0.17	0.06	205.7	0.004	0.23	35.77	28.1936	38.99	2.93799
7	Piped Supply	1	2009-05-01	114	+	4.5	0.5	748	22.8	6.6	154	104	83.2	0.01	0.11	0.1	47.5	0.004	23	28.8	3767.04	32.71	241.796
7	Piped Supply	2	2009-05-01	408.8	+	4.5	0.5	748	23.9	6.4	156	122	43.6	0.39	0.001	0.08	93.3	0.004	0.036	31.52	557.699	37.33	9.42649
7	Piped Supply	3	2009-06-01	169.1	+	5	0.5	749	24.8	6.4	166	122	82.2	0.41	<0.01	0.06	83.1	0.004	0.02	30.78	937.778	34.87	53.0457
7	Piped Supply	4	2009-06-01	211.5	+	4.5	1	751	24.7	6.5	156	126	82.2	0.32	0.3	0.02	98.8	0.004	2.3	20.68	1.12876e+06	34.94	50.501
7	Piped Supply	5	2009-06-01	4.2	+	4.5	1	744	27.2	6.7	164	112	84.2	0.2	0.08	0.02	111.1	0.004	0.17	31.67	501.938	35.21	41.7782
7	Piped Supply	6	2009-06-01	198.6	+	4.5	0.5	746	28.5	6.5	174	122	84.1	0.4	0.001	0.02	115.9	0.004	130	32.59	263.057	35.35	37.866
7	Piped Supply	7	2009-07-01	312.4	+	4.5	0.5	770	25	6.4	178	112	103	0.2	0.001	0.01	88.7	0.004	14	31.56	542.251	35.95	24.8456
7	Piped Supply	8	2009-07-01	271.5	+	4.5	0.5	769	25.2	6.4	180	112	84.2	0.07	0.03	0.01	107.1	0.004	0.08	31.92	421.114	35.74	28.7939
7	Piped Supply	9	2009-07-01	160.2	+	4.5	2	769	26	6.5	170	122	77.2	0.02	0.001	0.01	83.8	0.004	17	35.38	37.0766	40.75	0.853591
7	Piped Supply	10	2009-07-01	167.8	+	5	7	766	26.6	6.5	166	116	81.2	0.03	0.09	0.01	86.9	0.004	0.08	0	0	0	0
7	Piped Supply	11	2009-07-01	855.3	+	4.5	2	778	24.7	6.5	166	120	80.2	0.3	0.11	0.01	92.8	0.004	0.26	32.57	266.778	41.82	0.402624
7	Piped Supply	12	2009-08-01	310.8	+	4.5	2	665	25.5	6.6	138	104	32.7	0.01	0.05	0.01	82.6	0.004	0.17	31.92	421.114	38.95	3.02169
7	Piped Supply	13	2009-08-01	573	+	4.5	1	693	24.6	6.6	144	96	71.3	0.28	0.05	0.05	99.1	0.004	94	31.52	557.699	33.98	99.106
7	Piped Supply	14	2009-08-01	616.8	+	4.5	0.5	722	25	6.4	156	88	78.2	0.22	0.07	0.01	108.9	0.004	0.07	33.29	160.898	36.85	13.2054
7	Piped Supply	15	2009-08-01	587.5	+	4.5	0.5	780	24	6.5	166	86	83.2	0.62	0.001	0.01	134.3	0.004	23	34.74	58.1166	37.59	7.85326
7	Piped Supply	16	2009-09-01	364.6	+	4.5	0.5	809	26.4	6.8	182	92	89.1	0.23	0.001	0.03	143.9	0.004	49	33.71	119.798	38.3	4.7698
7	Piped Supply	17	2009-09-01	301.5	+	4.5	2	845	23.1	6.4	188	80	97	0.23	0.66	0.01	138.7	0.004	23	34.25	81.9879	38.4	4.44631
7	Piped Supply	18	2009-09-01	12.8	+	5	2	845	25.9	6.4	194	100	89.1	0.15	0.26	0.01	156.9	0.004	0.08	35.62	31.3256	0	0
7	Piped Supply	19	2009-09-01	140.3	+	4.5	0.5	855	23.4	6.5	208	94	91.1	0.45	0.1	0.01	162.1	0.004	0.01	32.99	198.632	37.77	6.9207
7	Piped Supply	20	2009-09-01	101.6	+	4.5	0.5	845	25.2	6.4	204	94	83.2	0.15	0.09	0.01	159.6	0.004	130	29.52	2271.96	32.71	241.796
7	Piped Supply	21	2009-10-01	533.7	+	4.5	1	742	24.1	6.5	158	90	83.2	0.02	0.36	0.01	115.9	0.004	0.27	33.64	125.835	36.58	15.9625
7	Piped Supply	22	2009-10-01	3.4	+	4.5	1	703	22.7	6.4	140	92	81.2	0.01	0.001	0.01	90.3	0.004	0.13	33	197.242	37.82	6.6819
7	Piped Supply	23	2009-10-01	0	+	4.5	1	695	23	6.5	138	90	77.2	0.03	0.14	0.01	99.3	0.004	1.7	33.81	111.673	37.39	9.03754
7	Piped Supply	24	2009-10-01	0	-		ND	ND	ND	ND	ND	ND	ND	ND	ND	ND	ND	ND	ND	ND	ND	ND	ND
7	Piped Supply	25	2009-11-01	0	+	4.5	1	693	20.1	6.4	128	94	75.2	0.3	0.04	0.01	86.6	0.004	33	34.76	57.306	36.58	15.9625
7	Piped Supply	26	2009-11-01	6.3	+	4.5	1	679	19.8	6.7	132	96	79.2	0.35	0.04	0.01	79.9	0.004	0.01	33.98	99.106	37.58	7.90861
7	Piped Supply	27	2009-11-01	0	+	4.5	1	690	19.3	6.7	130	96	78.2	0.24	0.27	0.07	80.8	0.004	0.02	35.7	29.6142	0	0
7	Piped Supply	28	2009-11-01	0	+	4.5	1	683	16.7	6.7	134	100	78.2	0.04	0.08	0.01	71.8	0.004	2.3	29.47	2353.15	0	0
7	Piped Supply	29	2009-12-01	0	+	4.5	2	696	16.7	6.8	140	106	78.2	0.05	0.04	0.01	73.4	0.004	0.05	33	197.242	36.69	14.7758
7	Piped Supply	30	2009-12-01	0	+	4.5	2	711	16.6	6.8	146	108	80.2	0.23	0.001	0.44	74.6	0.004	0.14	34.12	89.8256	37.71	7.21855
7	Piped Supply	31	2009-12-01	0	+	4.5	0.5	720	16	6.5	156	104	79.2	0.01	0.09	0.01	86.3	0.004	0.01	0	0	0	0
7	Piped Supply	32	2009-12-01	0	-	ND	ND	ND	ND	ND	ND	ND	ND	ND	ND	ND	ND	ND	ND	ND	ND	ND	ND
7	Piped Supply	33	2009-12-01	21.6	+	5	0.5	770	13.9	6.5	168	104	79.2	0.01	0.25	0.01	97.5	0.004	0.01	32.83	222.254	37.84	6.5887
7	Piped Supply	34	2010-01-01	0	+	4.5	0.5	741	12.8	7	156	102	80.2	0.3	0.09	0.01	85.4	0.004	0.21	ND	ND	ND	ND
7	Piped Supply	35	2010-01-01	0	+	4.5	0.5	780	14.3	6.7	164	106	81.2	0.12	0.14	0.01	97.1	0.004	0.01	ND	ND	ND	ND
7	Piped Supply	36	2010-01-01	0	+	5	0.5	763	13.8	6.6	138	102	81.2	0.28	0.001	0.01	103.8	0.004	0.01	ND	ND	ND	ND
7	Piped Supply	37	2010-01-01	0	+	4.5	0.5	776	15.3	6.7	168	102	82.2	0.04	0.08	0.01	112.1	0.004	0.01	28.76	3874.36	35.36	37.6011
7	Piped Supply	38	2010-02-01	0	+	4.5	2	778	15.9	6.6	176	112	83.2	0.21	0.3	0.01	106.7	0.004	0.01	29.19	2864.51	37.76	6.96947
7	Piped Supply	39	2010-02-01	0	+	4.5	0.5	795	15.2	6.7	182	110	83.2	0.19	0.17	0.01	106.3	0.004	0.001	30.85	892.791	35.45	35.298
7	Piped Supply	40	2010-02-01	0	+	4.5	0.5	784	13.4	6.5	184	126	86.1	0.11	0.25	0.78	94	0.004	13	32.52	276.312	35.32	38.6723
7	Piped Supply	41	2010-02-01	0	+	4.5	0.5	786	16.7	6.6	178	146	90.1	0.12	0.37	0.23	76.2	0.004	0.22	33.61	128.514	39.75	1.72286
7	Piped Supply	42	2010-03-01	0	+	4.5	1	797	19.3	6.8	180	144	93.1	0.18	0.11	0.02	80.4	0.004	0.001	33.63	126.721	34.82	54.9414
7	Piped Supply	43	2010-03-01	0	+	4.5	0.5	793	19.9	6.5	172	136	93.1	0.11	0.11	0.01	90	0.004	0.001	0	0	41.96	0.364922
7	Piped Supply	44	2010-03-01	0	+	4.5	0.5	790	20.2	6.4	168	134	92.1	0.19	0.95	0.01	93.6	0.004	0.17	36.88	12.93	0	0
7	Piped Supply	45	2010-03-01	0	+	4.5	0.5	781	24	6.4	166	132	90.1	0.26	0.21	0.01	90.6	0.004	7.9	34.57	65.4862	41.66	0.450505
7	Piped Supply	46	2010-03-01	0	+	4.5	0.5	797	22.9	6.4	184	134	93.1	0.14	0.34	0.01	91.8	0.004	7	0	0	0	0
7	Piped Supply	47	2010-04-01	0	+	4.5	0.5	783	24	6.5	170	130	90.1	0.24	0.18	0.01	93.3	0.004	0.001	34.64	62.3448	0	0
7	Piped Supply	48	2010-04-01	0	+	4.5	1	793	24.4	6.4	166	134	91.1	0.13	0.03	0.01	93	0.004	0.13	36	23.9883	0	0
7	Piped Supply	49	2010-04-01	0	+	4.5	2	777	25	6.4	166	134	92	0.18	0.08	0.01	120.7	0.004	0.001	31.37	619.655	36.29	19.5682
7	Piped Supply	50	2010-04-01	0	+	4.5	0.5	785	25.6	6.5	174	136	92.1	0.02	0.04	0.01	91.4	0.004	0.02	31.57	538.456	37.9	6.31684
7	Piped Supply	51	2010-05-01	0	+	4.5	0.5	877	23.2	6.4	206	156	90	0.24	0.25	0.05	105.7	0.004	0.13	30.77	944.387	36.92	12.5719
7	Piped Supply	52	2010-05-01	0	+	4.5	0.5	869	26.8	6.5	198	154	99	1.9	0.25	0.01	97	0.004	7.9	0	0	40.02	1.42528
7	Piped Supply	53	2010-05-01	0	+	5	2	276	26.5	7.5	212	146	96	0.27	0.05	0.01	93	0.004	3.3	33.38	151.043	39.55	1.98267
8	Piped Supply	1	2009-05-01	114	+	4.5	12	251	22.6	7.3	100	118	10.9	0.01	0.33	0.01	1.7	0.004	0.03	29.25	2746.31	35.11	44.8177
8	Piped Supply	2	2009-05-01	408.8	+	4.5	2	253	24.3	7.4	94	114	8.9	0.12	0.001	0.01	1.7	0.004	0.03	30.61	1056.7	35.02	47.7419
8	Piped Supply	3	2009-06-01	169.1	+	4.5	4	255	24.7	7.18	98	118	10	0.2	0.36	0.01	1.5	0.004	0.01	30.57	1086.8	36.41	17.9866
8	Piped Supply	4	2009-06-01	211.5	+	4.5	0.5	257	24.9	7.4	92	116	10	0.16	0.2	0.01	1.2	0.004	0.01	30.78	937.778	36.01	23.8205
8	Piped Supply	5	2009-06-01	4.2	+	4.5	2	260	27.5	7.4	110	120	9.9	0.56	0.2	0.01	1.61	0.004	0.01	31.39	611.012	37.13	10.848
8	Piped Supply	6	2009-06-01	198.6	+	4.5	5	976	28.5	7	264	366	167.3	2.14	0.2	0.78	180.9	0.004	23	34.14	88.5727	0	0
8	Piped Supply	7	2009-07-01	312.4	+	4.5	1	281	25.2	7.5	112	128	3	0.15	0.14	0.01	1.5	0.004	0.01	32.46	288.204	36.26	19.9848
8	Piped Supply	8	2009-07-01	271.5	+	4.5	2	285	25.7	7.5	110	126	9.9	0.1	0.09	0.01	1.52	0.004	7	0	0	34.72	58.9386
8	Piped Supply	9	2009-07-01	160.2	+	4.5	6	284	26	7	102	126	10.9	0.29	0.13	0.01	1.7	0.004	0.33	0	0	40.71	0.87791
8	Piped Supply	10	2009-07-01	167.8	-	ND	ND	ND	ND	ND	ND	ND	ND	ND	ND	ND	ND	ND	ND	ND	ND	ND	ND
8	Piped Supply	11	2009-07-01	855.3	+	4.5	4	293	25	7.4	114	124	10.9	0.14	0.11	0.01	1.4	0.004	0.02	32.38	304.86	38.72	3.5514
8	Piped Supply	12	2009-08-01	310.8	+	4.5	2	274	25.9	7.4	108	122	10.9	0.01	0.11	0.01	1.6	0.004	0.02	32.61	259.388	36.88	12.93
8	Piped Supply	13	2009-08-01	573	+	4.5	2	267	25.1	7.5	104	120	10	0.11	0.001	0.01	1.7	0.004	0.01
8	Piped Supply	14	2009-08-01	616.8	+	4.5	3	262	25.2	7.4	110	120	10.9	0.18	0.001	0.01	2	0.004	0.01
8	Piped Supply	15	2009-08-01	587.5	+	4.5	1	263	24.5	7.3	110	122	11.9	0.01	0.001	0.01	1.9	0.004	0.01	32.77	231.82	35.31	38.9448
8	Piped Supply	16	2009-09-01	364.6	+	4.5	1	254	27.2	7.5	106	120	11.9	0.09	0.14	0.01	1.9	0.004	0.01	33.99	98.4124	37.36	9.22996
8	Piped Supply	17	2009-09-01	301.5	+	4.5	1	256	23.6	7.4	102	116	9.9	0.15	1	0.01	2	0.004	0.01	35.57	32.4452	0	0
8	Piped Supply	18	2009-09-01	12.8	+	4.5	0.5	252	26	7.7	102	118	5.9	0.07	0.3	0.01	1.8	0.004	0.01	0	0	39.08	2.75804
8	Piped Supply	19	2009-09-01	140.3	+	4.5	0.5	256	23.4	7.5	106	116	10.9	0.01	0.12	0.01	1.72	0.004	0.01	33.03	193.13	35.99	24.1574
8	Piped Supply	20	2009-09-01	101.6	+	4.5	0.5	252	25.2	7.4	110	116	19.8	0.13	0.001	0.01	1.6	0.004	0.01	33.39	149.986	38.64	3.75664
8	Piped Supply	21	2009-10-01	533.7	+	4.5	2	255	24	7.6	104	116	9.9	0.01	0.001	0.01	1.8	0.004	0.01	32.63	255.77	37.43	8.78719
8	Piped Supply	22	2009-10-01	3.4	+	4.5	2	255	22.7	7.2	106	118	9.9	0.01	0.21	0.01	1.8	0.004	0.01	31.71	488.034	35.23	41.1955
8	Piped Supply	23	2009-10-01	0	+	4.5	2	253	23	7.3	102	114	9.9	0.01	0.03	0.01	1.9	0.004	0.01	32	398.107	35.89	25.9149
8	Piped Supply	24	2009-10-01	0	-	ND	ND	ND	ND	ND	ND	ND	ND	ND	ND	ND	ND	ND	ND	ND	ND	ND	ND
8	Piped Supply	25	2009-11-01	0	+	5	2	255	20.1	7.5	100	108	10	0.15	0.21	0.01	1.9	0.004	0.01	32.99	198.632	0	0
8	Piped Supply	26	2009-11-01	6.3	+	5	2	254	19.5	7.9	96	116	9.9	0.03	0.13	0.01	1.6	0.004	0.01	34.92	51.2153	36.4	18.1134
8	Piped Supply	27	2009-11-01	0	+	4.5	1	266	18.9	7.9	110	122	11.9	0.01	0.24	0.01	1.7	0.004	0.02	33.54	134.99	38.01	5.84723
8	Piped Supply	28	2009-11-01	0	+	4.5	2	259	16.5	8	104	122	10.9	0.02	0.001	0.01	1.5	0.004	0.01	36.93	12.4839	0	0
8	Piped Supply	29	2009-12-01	0	+	4.5	1	266	16.6	8	110	126	9.9	0.4	0.19	0.01	1.6	0.004	0.01	33.64	125.835	0	0
8	Piped Supply	30	2009-12-01	0	+	4.5	1	260	16.6	7.9	112	120	8.9	0.01	0.39	0.01	1.4	0.004	0.01	32.66	250.438	36.5	16.885
8	Piped Supply	31	2009-12-01	0	+	4.5	1	261	15.5	7.9	110	120	7.9	0.01	0.09	0.01	1.3	0.004	0.01	36.33	19.0261	0	0
8	Piped Supply	32	2009-12-01	0	-	ND	ND	ND	ND	ND	ND	ND	ND	ND	ND	ND	ND	ND	ND	ND	ND	ND	ND
8	Piped Supply	33	2009-12-01	21.6	+	4.5	1	264	13.4	7.7	114	124	7.9	0.01	0.05	0.01	1.6	0.004	0.01	34.83	54.5569	36.82	13.4865
8	Piped Supply	34	2010-01-01	0	+	4.5	2	257	13.3	7.8	108	120	9.9	0.07	0.06	0.01	1.6	0.004	0.01	ND	ND	ND	ND
8	Piped Supply	35	2010-01-01	0	+	4.5	2	259	14	8	108	124	10.9	0.01	0.11	0.01	1.2	0.004	0.01	ND	ND	ND	ND
8	Piped Supply	36	2010-01-01	0	+	4.5	0.5	258	14.8	7.9	106	118	9.9	0.01	0.17	0.01	1.7	0.004	0.01	ND	ND	ND	ND
8	Piped Supply	37	2010-01-01	0	+	4.5	0.5	256	15.1	7.8	106	124	9.9	0.02	0.16	0.01	1.7	0.004	0.01	32.51	278.259	36.92	12.5719
8	Piped Supply	38	2010-02-01	0	+	4.5	1	269	15.9	7.9	108	126	10.9	0.01	0.14	0.01	1.6	0.004	0.01	29.32	2614.57	34.98	49.1021
8	Piped Supply	39	2010-02-01	0	+	5	3	269	15.2	7.9	122	122	9.9	0.27	0.36	0.01	1.3	0.004	0.001	32.68	246.945	33.82	110.892
8	Piped Supply	40	2010-02-01	0	+	4.5	2	265	12.9	7.9	116	124	9.9	0.03	0.19	0.01	1.6	0.004	0.001	32.92	208.641	35.52	33.6047
8	Piped Supply	41	2010-02-01	0	+	4.5	0.5	255	16.4	7.7	112	122	8.9	0.14	0.15	0.01	1.5	0.004	0.001	0	0	40.09	1.35691
8	Piped Supply	42	2010-03-01	0	+	4.5	1	265	19.2	7.8	108	126	9.9	0.03	1.2	0.01	2	0.004	0.001	0	0	41.51	0.500553
8	Piped Supply	43	2010-03-01	0	+	5	3	263	19.7	7.6	108	126	9.9	0.43	0.22	0.01	2.2	0.004	0.001	35.28	39.7741	0	0
8	Piped Supply	44	2010-03-01	0	+	4.5	5	261	20.3	7.7	110	126	9.9	0.07	0.32	0.01	2	0.004	0.001	0	0	40.43	1.06869
8	Piped Supply	45	2010-03-01	0	+	4.5	0.5	264	24.4	7.7	104	130	11.9	0.14	0.21	0.03	1.8	0.004	0.001	34.93	50.8569	0	0
8	Piped Supply	46	2010-03-01	0	+	4.5	1	272	23	7.7	110	130	10.9	0.48	0.06	0.03	1.9	0.004	0.001	35.63	31.1064	0	0
8	Piped Supply	47	2010-04-01	0	+	4.5	6	281	24.1	7.4	110	132	11.9	0.02	0.21	0.01	3.9	0.004	0.001	0	0	0	0
8	Piped Supply	48	2010-04-01	0	+	4.5	0.5	272	25.1	7.5	102	130	11.9	0.01	0.05	0.91	4.3	0.004	0.001	34.53	67.3519	0	0
8	Piped Supply	49	2010-04-01	0	+	4.5	1	270	25.2	7.6	94	138	11.9	0.05	0.19	0.01	2.1	0.004	0.05	34.47	70.2506	39.65	1.8482
8	Piped Supply	50	2010-04-01	0	+	4.5	1	272	26	7.5	106	132	12.9	0.04	0.001	0.01	1.8	0.004	0.001	30.99	809.189	37.04	11.5558
8	Piped Supply	51	2010-05-01	0	+	4.5	3	275	23.7	7.6	106	128	9.9	0.22	0.05	0.04	2.3	0.004	0.001	0	0	37.26	9.90148
8	Piped Supply	52	2010-05-01	0	+	4.5	4	275	27.5	7.6	114	138	13.9	0.05	0.06	0.01	2.2	0.004	0.001	0	0	0	0
8	Piped Supply	53	2010-05-01	0	+	4.5	2	272	26.5	7.7	114	128	10.9	0.17	0.04	0.01	2.2	0.004	0.001	33.62	127.614	40.01	1.43532
9	Stone Spout	1	2009-05-01	114	-	ND	ND	ND	ND	ND	ND	ND	ND	ND	ND	ND	ND	ND	ND	ND	ND	ND	ND
9	Stone Spout	2	2009-05-01	408.8	-	ND	ND	ND	ND	ND	ND	ND	ND	ND	ND	ND	ND	ND	ND	ND	ND	ND	ND
9	Stone Spout	3	2009-06-01	169.1	-	ND	ND	ND	ND	ND	ND	ND	ND	ND	ND	ND	ND	ND	ND	ND	ND	ND	ND
9	Stone Spout	4	2009-06-01	211.5	-	ND	ND	ND	ND	ND	ND	ND	ND	ND	ND	ND	ND	ND	ND	ND	ND	ND	ND
9	Stone Spout	5	2009-06-01	4.2	-	ND	ND	ND	ND	ND	ND	ND	ND	ND	ND	ND	ND	ND	ND	ND	ND	ND	ND
9	Stone Spout	6	2009-06-01	198.6	-	ND	ND	ND	ND	ND	ND	ND	ND	ND	ND	ND	ND	ND	ND	ND	ND	ND	ND
9	Stone Spout	7	2009-07-01	312.4	-	ND	ND	ND	ND	ND	ND	ND	ND	ND	ND	ND	ND	ND	ND	ND	ND	ND	ND
9	Stone Spout	8	2009-07-01	271.5	-	ND	ND	ND	ND	ND	ND	ND	ND	ND	ND	ND	ND	ND	ND	ND	ND	ND	ND
9	Stone Spout	9	2009-07-01	160.2	-	ND	ND	ND	ND	ND	ND	ND	ND	ND	ND	ND	ND	ND	ND	ND	ND	ND	ND
9	Stone Spout	10	2009-07-01	167.8	-	ND	ND	ND	ND	ND	ND	ND	ND	ND	ND	ND	ND	ND	ND	ND	ND	ND	ND
9	Stone Spout	11	2009-07-01	855.3	-	ND	ND	ND	ND	ND	ND	ND	ND	ND	ND	ND	ND	ND	ND	ND	ND	ND	ND
9	Stone Spout	12	2009-08-01	310.8	-	ND	ND	ND	ND	ND	ND	ND	ND	ND	ND	ND	ND	ND	ND	ND	ND	ND	ND
9	Stone Spout	13	2009-08-01	573	-	ND	ND	ND	ND	ND	ND	ND	ND	ND	ND	ND	ND	ND	ND	ND	ND	ND	ND
9	Stone Spout	14	2009-08-01	616.8	+	ND	ND	ND	ND	ND	ND	ND	ND	ND	ND	ND	ND	ND	4.9	ND	ND	ND	ND
9	Stone Spout	15	2009-08-01	587.5	+	ND	ND	ND	ND	ND	ND	ND	ND	ND	ND	ND	ND	ND	2.3	30.72	978.138	36.09	22.519
9	Stone Spout	16	2009-09-01	364.6	+	ND	ND	ND	ND	ND	ND	ND	ND	ND	ND	ND	ND	ND	1.9	30.14	1469.94	35.65	30.6726
9	Stone Spout	17	2009-09-01	301.5	+	ND	ND	ND	ND	ND	ND	ND	ND	ND	ND	ND	ND	ND	17	33.61	128.514	38.14	5.33703
9	Stone Spout	18	2009-09-01	12.8	+	ND	ND	ND	ND	ND	ND	ND	ND	ND	ND	ND	ND	ND	0.08	31.47	577.63	38.5	4.14477
9	Stone Spout	19	2009-09-01	140.3	+	ND	ND	ND	ND	ND	ND	ND	ND	ND	ND	ND	ND	ND	4.6	0	0	0	0
9	Stone Spout	20	2009-09-01	101.6	+	4.5	0.5	658	25.2	6.3	170	114	65.3	0.31	0.19	0.07	91.2	0.004	0.13	33.6	129.42	37.51	8.30711
9	Stone Spout	21	2009-10-01	533.7	+	5	2	648	24.1	6.1	185	108	65.3	0.25	0.001	0.03	185.8	0.004	0.34	33.98	99.106	36.75	14.1661
9	Stone Spout	22	2009-10-01	3.4	+	5	1	665	22.8	6.2	158	108	69.3	0.06	0.17	0.06	86.2	0.004	0.07	0	0	38.87	3.19632
9	Stone Spout	23	2009-10-01	0	+	4.5	0.5	663	23.1	6.1	160	110	63.4	0.06	0.09	0.07	94.1	0.004	3.1	30.8	924.698	37.21	10.2553
9	Stone Spout	24	2009-10-01	0	-	ND	ND	ND	ND	ND	ND	ND	ND	ND	ND	ND	ND	ND	ND	ND	ND	ND	ND
9	Stone Spout	25	2009-11-01	0	+	5	1	673	20.4	6.3	156	110	65.3	0.09	0.001	0.07	93.4	0.004	0.02	32.72	240.104	38.13	5.37465
9	Stone Spout	26	2009-11-01	6.3	+	5	0.5	673	19.7	6.4	164	116	63.4	0.16	0.13	0.07	91.2	0.004	0.08	35.27	40.0544	36.12	22.0496
9	Stone Spout	27	2009-11-01	0	+	4.5	0.5	688	19.4	6.4	164	114	66.3	0.03	0.03	0.04	94.6	0.004	7.9	33.63	126.721	0	0
9	Stone Spout	28	2009-11-01	0	+	4.5	0.5	688	16.8	6.4	176	118	67.3	0.4	0.33	0.07	95.1	0.004	13	33.7	120.642	38.66	3.70425
9	Stone Spout	29	2009-12-01	0	+	4.5	0.5	698	16.6	6.5	174	120	66.3	0.22	0.08	0.11	97.2	0.004	9.4	0	0	37.28	9.76338
9	Stone Spout	30	2009-12-01	0	+	4.5	0.5	700	16.9	6.4	178	116	68.3	0.12	0.25	0.06	90.2	0.004	0.01	33.57	132.175	36.63	15.4117
9	Stone Spout	31	2009-12-01	0	+	4.5	0.5	703	15.9	6.3	178	116	68.3	0.01	0.001	0.07	87.9	0.004	0.04	33.84	109.345	0	0
9	Stone Spout	32	2009-12-01	0	-	ND	ND	ND	ND	ND	ND	ND	ND	ND	ND	ND	ND	ND	ND	ND	ND	ND	ND
9	Stone Spout	33	2009-12-01	21.6	+	4.5	0.5	724	14.2	6.5	184	116	70.3	0.01	0.001	0.07	97.5	0.004	0.94	33.38	151.043	35.49	34.3202
9	Stone Spout	34	2010-01-01	0	+	4.5	0.5	714	12.9	6.6	196	116	32.7	0.1	0.001	0.04	98.6	0.004	0.07	ND	ND	ND	ND
9	Stone Spout	35	2010-01-01	0	+	4.5	0.5	716	14.3	7.3	174	118	72.3	0.13	0.11	0.03	95.3	0.004	0.05	ND	ND	ND	ND
9	Stone Spout	36	2010-01-01	0	-	ND	ND	ND	ND	ND	ND	ND	ND	ND	ND	ND	ND	ND	ND	ND	ND	ND	ND
9	Stone Spout	37	2010-01-01	0	-	ND	ND	ND	ND	ND	ND	ND	ND	ND	ND	ND	ND	ND	ND	ND	ND	ND	ND
9	Stone Spout	38	2010-02-01	0	-	ND	ND	ND	ND	ND	ND	ND	ND	ND	ND	ND	ND	ND	ND	ND	ND	ND	ND
9	Stone Spout	39	2010-02-01	0	-	ND	ND	ND	ND	ND	ND	ND	ND	ND	ND	ND	ND	ND	ND	ND	ND	ND	ND
9	Stone Spout	40	2010-02-01	0	-	ND	ND	ND	ND	ND	ND	ND	ND	ND	ND	ND	ND	ND	ND	ND	ND	ND	ND
9	Stone Spout	41	2010-02-01	0	+	5	1	663	16.4	6.4	170	132	68.3	2.2	0.001	0.63	86.1	0.004	0.001	0	0	41.21	0.617945
9	Stone Spout	42	2010-03-01	0	-	ND	ND	ND	ND	ND	ND	ND	ND	ND	ND	ND	ND	ND
9	Stone Spout	43	2010-03-01	0	-	ND	ND	ND	ND	ND	ND	ND	ND	ND	ND	ND	ND	ND	ND	ND	ND	ND	ND
9	Stone Spout	44	2010-03-01	0	-	ND	ND	ND	ND	ND	ND	ND	ND	ND	ND	ND	ND	ND	ND	ND	ND	ND	ND
9	Stone Spout	45	2010-03-01	0	-	ND	ND	ND	ND	ND	ND	ND	ND	ND	ND	ND	ND	ND	ND	ND	ND	ND	ND
9	Stone Spout	46	2010-03-01	0	-	ND	ND	ND	ND	ND	ND	ND	ND	ND	ND	ND	ND	ND	ND	ND	ND	ND	ND
9	Stone Spout	47	2010-04-01	0	-	ND	ND	ND	ND	ND	ND	ND	ND	ND	ND	ND	ND	ND	ND	ND	ND	ND	ND
9	Stone Spout	48	2010-04-01	0	-	ND	ND	ND	ND	ND	ND	ND	ND	ND	ND	ND	ND	ND	ND	ND	ND	ND	ND
9	Stone Spout	49	2010-04-01	0	-	ND	ND	ND	ND	ND	ND	ND	ND	ND	ND	ND	ND	ND	ND	ND	ND	ND	ND
9	Stone Spout	50	2010-04-01	0	-	ND	ND	ND	ND	ND	ND	ND	ND	ND	ND	ND	ND	ND	ND	ND	ND	ND	ND
9	Stone Spout	51	2010-05-01	0	-	ND	ND	ND	ND	ND	ND	ND	ND	ND	ND	ND	ND	ND	ND	ND	ND	ND	ND
9	Stone Spout	52	2010-05-01	0	-	ND	ND	ND	ND	ND	ND	ND	ND	ND	ND	ND	ND	ND	ND	ND	ND	ND	ND
9	Stone Spout	53	2010-05-01	0	-	ND	ND	ND	ND	ND	ND	ND	ND	ND	ND	ND	ND	ND	ND	ND	ND	ND	ND
10	Stone Spout	1	2009-05-01	114	-	ND	ND	ND	ND	ND	ND	ND	ND	ND	ND	ND	ND	ND	ND	ND	ND	ND	ND
10	Stone Spout	2	2009-05-01	408.8	-	ND	ND	ND	ND	ND	ND	ND	ND	ND	ND	ND	ND	ND	ND	ND	ND	ND	ND
10	Stone Spout	3	2009-06-01	169.1	-	ND	ND	ND	ND	ND	ND	ND	ND	ND	ND	ND	ND	ND	ND	ND	ND	ND	ND
10	Stone Spout	4	2009-06-01	211.5	-	ND	ND	ND	ND	ND	ND	ND	ND	ND	ND	ND	ND	ND	ND	ND	ND	ND	ND
10	Stone Spout	5	2009-06-01	4.2	-	ND	ND	ND	ND	ND	ND	ND	ND	ND	ND	ND	ND	ND	ND	ND	ND	ND	ND
10	Stone Spout	6	2009-06-01	198.6	-	ND	ND	ND	ND	ND	ND	ND	ND	ND	ND	ND	ND	ND	ND	ND	ND	ND	ND
10	Stone Spout	7	2009-07-01	312.4	-	ND	ND	ND	ND	ND	ND	ND	ND	ND	ND	ND	ND	ND	ND	ND	ND	ND	ND
10	Stone Spout	8	2009-07-01	271.5	-	ND	ND	ND	ND	ND	ND	ND	ND	ND	ND	ND	ND	ND	ND	ND	ND	ND	ND
10	Stone Spout	9	2009-07-01	160.2	-	ND	ND	ND	ND	ND	ND	ND	ND	ND	ND	ND	ND	ND	ND	ND	ND	ND	ND
10	Stone Spout	10	2009-07-01	167.8	-	ND	ND	ND	ND	ND	ND	ND	ND	ND	ND	ND	ND	ND	ND	ND	ND	ND	ND
10	Stone Spout	11	2009-07-01	855.3	-	ND	ND	ND	ND	ND	ND	ND	ND	ND	ND	ND	ND	ND	ND	ND	ND	ND	ND
10	Stone Spout	12	2009-08-01	310.8	-	ND	ND	ND	ND	ND	ND	ND	ND	ND	ND	ND	ND	ND	ND	ND	ND	ND	ND
10	Stone Spout	13	2009-08-01	573	-	ND	ND	ND	ND	ND	ND	ND	ND	ND	ND	ND	ND	ND	ND	ND	ND	ND	ND
10	Stone Spout	14	2009-08-01	616.8	+	ND	ND	ND	ND	ND	ND	ND	ND	ND	ND	ND	ND	ND	180	ND	ND	ND	ND
10	Stone Spout	15	2009-08-01	587.5	+	ND	ND	ND	ND	ND	ND	ND	ND	ND	ND	ND	ND	ND	33	16.19	2.64271e+07	0	0
10	Stone Spout	16	2009-09-01	364.6	+	ND	ND	ND	ND	ND	ND	ND	ND	ND	ND	ND	ND	ND	0.01	30.58	1079.2	35.93	25.1971
10	Stone Spout	17	2009-09-01	301.5	+	ND	ND	ND	ND	ND	ND	ND	ND	ND	ND	ND	ND	ND	0.27	0	0	0	0
10	Stone Spout	18	2009-09-01	12.8	+	ND	ND	ND	ND	ND	ND	ND	ND	ND	ND	ND	ND	ND	0.08	31.81	454.936	36.25	20.1257
10	Stone Spout	19	2009-09-01	140.3	+	ND	ND	ND	ND	ND	ND	ND	ND	ND	ND	ND	ND	ND	0.07	32.77	231.82	37.44	8.72569
10	Stone Spout	20	2009-09-01	101.6	+	4.5	0.5	653	25.3	6.2	170	110	31.7	0.17	0.06	0.04	87	0.004	0.1	35.16	43.2713	38.9	3.12968
10	Stone Spout	21	2009-10-01	533.7	+	5	2	649	24	6.1	164	106	65.3	0.01	0.06	0.02	90.8	0.004	0.07	32.24	336.357	36.48	17.1238
10	Stone Spout	22	2009-10-01	3.4	+	5	0.5	701	22.7	6.1	162	118	71.3	0.01	0.17	0.01	88.5	0.004	46	32.82	223.821	36.78	13.8708
10	Stone Spout	23	2009-10-01	0	+	4.5	0.5	667	23.1	6.1	164	110	67.3	0.02	0.001	0.02	95.5	0.004	4.9	33.08	186.466	35.62	31.3256
10	Stone Spout	24	2009-10-01	0	-	ND	ND	ND	ND	ND	ND	ND	ND	ND	ND	ND	ND	ND	ND	ND	ND	ND	ND
10	Stone Spout	25	2009-11-01	0	+	5	0.5	707	20.6	6.1	166	114	65.3	0.06	0.04	0.02	102.6	0.004	2.3	35.65	30.6726	36.55	16.3023
10	Stone Spout	26	2009-11-01	6.3	+	5	0.5	661	19.8	6.4	160	114	63.4	0.01	0.001	0.02	87.9	0.004	14	31.76	471.194	33.72	118.96
10	Stone Spout	27	2009-11-01	0	+	4.5	0.5	721	19.3	6.4	170	118	69.3	0.23	0.001	0.04	102.4	0.004	0.05	39.45	2.12691	0	0
10	Stone Spout	28	2009-11-01	0	+	4.5	0.5	658	17	6.5	164	110	65.3	0.01	0.001	0.01	90.1	0.004	11	33.8	112.46	38.06	5.64547
10	Stone Spout	29	2009-12-01	0	+	4.5	0.5	669	16.9	6.5	166	114	63.4	0.14	0.001	0.01	90.8	0.004	23	0	0	0	0
10	Stone Spout	30	2009-12-01	0	+	4.5	1	652	16.8	6.5	168	112	63.4	0.09	0.001	0.01	77.8	0.004	4.9	0	0	37.68	7.37225
10	Stone Spout	31	2009-12-01	0	+	5	0.5	717	15.9	6.4	186	116	71.3	0.01	0.13	0.06	101.2	0.004	0.01	35.86	26.4667	0	0
10	Stone Spout	32	2009-12-01	0	-	ND	ND	ND	ND	ND	ND	ND	ND	ND	ND	ND	ND	ND	ND	ND	ND	ND	ND
10	Stone Spout	33	2009-12-01	21.6	+	4.5	0.5	669	14.4	6.4	168	110	65.3	0.01	0.14	0.02	82	0.004	23	0	0	0	0
10	Stone Spout	34	2010-01-01	0	+	4.5	0.5	726	12.9	6.6	190	116	35.6	0.4	0.001	0.03	105	0.004	0.13	ND	ND	ND	ND
10	Stone Spout	35	2010-01-01	0	+	4.5	0.5	661	14.2	6.3	170	118	63.4	0.15	0.001	0.02	80.3	0.004	0.01	ND	ND	ND	ND
10	Stone Spout	36	2010-01-01	0	-	ND	ND	ND	ND	ND	ND	ND	ND	ND	ND	ND	ND	ND	ND	ND	ND	ND	ND
10	Stone Spout	37	2010-01-01	0	+	4.5	0.5	687	15.4	6.3	168	126	70.3	0.1	0.05	0.01	82.5	0.004	0.02	33.69	121.493	37.51	8.30711
10	Stone Spout	38	2010-02-01	0	+	4.5	0.5	660	15.8	6.6	168	122	64.3	0.03	0.14	0.01	81.6	0.004	0.05	28.65	4185.53	34.87	53.0457
10	Stone Spout	39	2010-02-01	0	+	4.5	0.5	671	15.5	6.8	174	118	66.3	0.08	0.001	0.02	81.2	0.004	0.05	33.93	102.648	37.42	8.84912
10	Stone Spout	40	2010-02-01	0	+	4.5	0.5	657	13.7	6.5	166	120	66.3	0.01	0.49	0.2	84.9	0.004	0.001	33.96	100.508	0	0
10	Stone Spout	41	2010-02-01	0	+	5	1	673	16.4	6.2	168	134	69.3	0.2	1.3	0.03	74.4	0.004	700	0	0	40.74	0.859607
10	Stone Spout	42	2010-03-01	0	+	5	2	671	19.2	6.4	184	132	68.3	0.66	0.18	0.1	90.4	0.004	0.34	35.61	31.5464	42.85	0.195321
10	Stone Spout	43	2010-03-01	0	+	4.5	1	669	20.4	6.3	170	130	70.3	1.2	0.25	0.08	92.4	0.004	0.13	0	0	42.46	0.256862
10	Stone Spout	44	2010-03-01	0	+	5	1	664	20.4	6.2	162	124	69.3	0.49	0.1	0.05	94.6	0.004	70	34.94	50.501	0	0
10	Stone Spout	45	2010-03-01	0	+	4.5	0.5	663	24.3	6.5	168	128	65.3	0.25	0.17	0.07	92.5	0.004	22	0	0	40.46	1.04641
10	Stone Spout	46	2010-03-01	0	+	4.5	0.5	682	23.3	6.4	180	132	70.3	0.1	0.17	0.06	90.8	0.004	79	0	0	39.87	1.58362
10	Stone Spout	47	2010-04-01	0	-	ND	ND	ND	ND	ND	ND	ND	ND	ND	ND	ND	ND	ND	ND	ND	ND	ND	ND
10	Stone Spout	48	2010-04-01	0	-	ND	ND	ND	ND	ND	ND	ND	ND	ND	ND	ND	ND	ND	ND	ND	ND	ND	ND
10	Stone Spout	49	2010-04-01	0	-	ND	ND	ND	ND	ND	ND	ND	ND	ND	ND	ND	ND	ND	ND	ND	ND	ND	ND
10	Stone Spout	50	2010-04-01	0	-	ND	ND	ND	ND	ND	ND	ND	ND	ND	ND	ND	ND	ND	ND	ND	ND	ND	ND
10	Stone Spout	51	2010-05-01	0	-	ND	ND	ND	ND	ND	ND	ND	ND	ND	ND	ND	ND	ND	ND	ND	ND	ND	ND
10	Stone Spout	52	2010-05-01	0	-	ND	ND	ND	ND	ND	ND	ND	ND	ND	ND	ND	ND	ND	ND	ND	ND	ND	ND
10	Stone Spout	53	2010-05-01	0	-	ND	ND	ND	ND	ND	ND	ND	ND	ND	ND	ND	ND	ND	ND	ND	ND	ND	ND
