# Supplementary material for: The Ecological Dynamics of Fecal Contamination and Salmonella Typhi and Salmonella Paratyphi A in Municipal Kathmandu Drinking Water
Source: PLoS Negl Trop Dis. 2016 Jan 6;10(1):e0004346. doi: 10.1371/journal.pntd.0004346 (PMC4703202; doi:10.1371/journal.pntd.0004346)
Supplement: S2 Dataset — . (XLSX) [file pntd.0004346.s008.xlsx]

## Sheet: Sheet1
OTU No.	SS01_Wk1	SS01_Wk2	SS01_Wk3	SS01_Wk5	SS01_Wk6	SS01_Wk7	SS01_Wk9	SS01_Wk10	SS01_Wk13	SS01_Wk14	SS02_Wk1	SS02_Wk5	SS02_Wk6	SS02_Wk7	SS02_Wk8	SS02_Wk9	SS02_Wk10	SS02_Wk11	SS02_Wk13	SS02_Wk14	SS02_Wk15	SS02_Wk16	SS02_Wk18	SS02_Wk19	SS02_Wk20	SS02_Wk21	SS02_Wk22	SS02_Wk25	SS02_Wk26	SS02_Wk28	SS02_Wk29	SS02_Wk30	SS02_Wk33	SS02_Wk37	SS02_Wk38	SS02_Wk39	SS02_Wk40	W05_Wk1	W05_Wk3	W05_Wk5	W05_Wk6	W05_Wk7	W05_Wk8	W05_Wk9	W05_Wk10	W05_Wk11	W05_Wk12	W05_Wk13	W05_Wk14
Otu00262	0	0	0	0.253378	0.337838	0	0	0.0844595	0	0	0	0.168919	0.0844595	0	0	1.18243	0	0	0	0	0	0	0	0	0	0	0	0	0	0	0	0	0	0	0.168919	0	0	0	0	0	0	0	0	0	0	0	0	0	0
Otu00979	0	0.168919	0	0.0844595	0.0844595	0	0	0	0	0	0	0.0844595	0	0	0	0	0.0844595	0.253378	0.0844595	0	0	0	0.0844595	0	0	0	0	0	0	0	0	0	0	0	0	0	0.168919	0	0	0	0	0	0	0	0	0.0844595	0	0	0
Otu00168	0.0844595	0	0	0	0.168919	0	0	0	0	0	0	0	0	0	0	0.168919	0	0.0844595	0.168919	0	0	0	0.253378	0	0	0	0	0	0	0	0	0	0	0	0	0	0.0844595	0	0	0	0	0	0	0	0	0	0	0	0
Otu00643	0	0	0	0.0844595	0.0844595	0.0844595	0	0.168919	0	0	0	0.0844595	0	0	0	0.253378	0	0	0	0	0	0	0	0	0	0.0844595	0	0	0	0	0	0	0	0	0	0.0844595	0	0	0	0	0	0	0	0	0	0	0	0	0
Otu00672	0	0	0	0	0.422297	0.0844595	0	0	0	0	0	0	0	0	0	0.337838	0	0	0	0	0	0	0	0	0	0	0	0	0	0	0	0	0	0	0	0	0	0	0	0	0	0	0	0	0	0	0	0	0
Otu01573	0	0	0	0	0	0	0	0	0	0	0	0.337838	0	0.0844595	0	0	0	0	0	0	0	0	0	0	0	0	0.168919	0	0	0	0	0	0	0	0	0	0	0	0	0	0	0	0	0	0	0	0	0	0
Otu02143	0	0	0	0	0	0	0	0	0	0	0	0	0	0	0	0	0	0.253378	0	0	0	0	0.168919	0	0	0	0	0	0	0	0	0	0	0	0	0	0	0	0	0	0	0	0	0	0	0	0	0	0
Otu01227	0	0.0844595	0	0	0.0844595	0	0	0	0	0	0	0	0	0	0	0	0	0	0	0	0	0	0	0	0	0	0	0	0	0	0	0	0	0	0	0	0	0	0	0	0	0	0	0	0	0	0	0	0
Otu01989	0	0	0	0	0.253378	0	0	0	0	0	0	0	0	0	0	0	0	0	0	0	0	0	0	0	0	0	0	0	0	0	0	0	0	0	0	0	0	0	0	0	0	0	0	0	0	0	0	0	0
Otu00516	0	0	0	0	0	0	0	0.0844595	0	0	0	0	0	0	0	0	0	0	0	0	0	0	0	0	0	0	0	0	0	0	0	0	0	0	0	0	0.0844595	0	0	0	0	0	0	0	0	0	0	0	0
Otu01619	0	0	0	0	0	0	0	0	0	0	0	0	0	0	0	0	0	0.168919	0	0	0	0	0	0	0	0	0	0	0	0	0	0	0	0	0	0	0	0	0	0	0	0	0	0	0	0	0	0	0
Otu01856	0	0	0	0	0.168919	0	0	0	0	0	0	0	0	0	0	0	0	0	0	0	0	0	0	0	0	0	0	0	0	0	0	0	0	0	0	0	0	0	0	0	0	0	0	0	0	0	0	0	0
Otu02494	0	0	0	0	0	0.168919	0	0	0	0	0	0	0	0	0	0	0	0	0	0	0	0	0	0	0	0	0	0	0	0	0	0	0	0	0	0	0	0	0	0	0	0	0	0	0	0	0	0	0
Otu00786	0	0	0	0	0	0	0	0	0	0	0	0	0	0	0	0	0	0	0	0	0	0	0.0844595	0	0	0	0	0	0	0	0	0	0	0	0	0	0	0	0	0	0	0	0	0	0	0	0	0	0
Otu02048	0	0	0	0	0.0844595	0	0	0	0	0	0	0	0	0	0	0	0	0	0	0	0	0	0	0	0	0	0	0	0	0	0	0	0	0	0	0	0	0	0	0	0	0	0	0	0	0	0	0	0
Otu02100	0	0	0	0	0.0844595	0	0	0	0	0	0	0	0	0	0	0	0	0	0	0	0	0	0	0	0	0	0	0	0	0	0	0	0	0	0	0	0	0	0	0	0	0	0	0	0	0	0	0	0
Otu02376	0	0	0	0	0	0.0844595	0	0	0	0	0	0	0	0	0	0	0	0	0	0	0	0	0	0	0	0	0	0	0	0	0	0	0	0	0	0	0	0	0	0	0	0	0	0	0	0	0	0	0
Otu00277	0	0	0	0.0844595	0	0.0844595	0	0.0844595	0	0	0	0	0	0	0	0.168919	0	0	0	0	0	0	0	0	0	0	0	0	0.337838	0	0	0	0	0	0	0	0	0	0	0	0	0	0	0	0	0	0	0	0
Otu06068	0	0	0	0	0	0	0	0	0	0	0	0	0	0	0	0	0	0	0	0	0	0	0	0	0	0	0	0	0	0	0	0	0	0	0.0844595	0	0	0	0	0	0	0	0	0	0	0	0	0	0
Otu00263	0	0	0	0.168919	0.0844595	0.168919	0	0.0844595	0	0	0	0	0	0.0844595	0	0	0	0.422297	0	0	0	0	0	0	0	0	0	0	1.26689	0	0	0	0	0	0	0.760135	1.18243	0	0	0	0	0	0.168919	0	0	0	0.0844595	0	0
Otu00156	0	0	0	0.253378	0.168919	0.0844595	0	0	0	0	0.0844595	0.675676	0.422297	0	0	0.422297	0	0.422297	0	0	0	0	0	0	0	0	0	0	0	0	0	0	0	0	0	0	0.168919	0	0	0	0	0	0	0	0	0	0	0	0
Otu01514	0	0	0	0	0.253378	0	0	0	0	0	0	0.0844595	0	0	0	0.760135	0	0.0844595	0	0	0	0	0.0844595	0	0	0	0	0	0	0	0	0.253378	0	0	0	0.0844595	0	0	0	0	0	0	0	0	0	0	0	0.0844595	0
Otu01290	0	0	0	0	0	0	0	0	0	0	0	0	0	0	0	0	0	0	0	0	0	0	0	0	0	0	0	0	0	0	0	0	0	0	0	0	0	0.337838	0	0	0	0	0	0	0	0	0	0	0
Otu00574	0	0	0	0	0	0	0	0	0	0	0	0	0	0	0	0	0	0.253378	0	0	0	0	0.168919	0	0	0	0	0	0	0	0	0	0	0	0	0	0.168919	0	0	0	0	0	0	0	0	0	0	0	0
Otu00238	0	0	0	0	0.168919	0	0	0.0844595	0	0	0	0	0	0	0	0	0.168919	0	0	0	0	0	0	0	0	0	0	0	0	0	0	0	0	0	0	0	0	0	0	0	0	0	0	0	0	0	0	0	0
Otu00396	0	0	0	0	0	0	0	0.253378	0	0	0	0	0	0	0	0	0	0.168919	0	0	0	0	0	0	0	0	0	0	0	0	0	0	0	0	0	0	0	0	0	0	0	0	0	0	0	0	0	0	0
Otu05854	0	0	0	0	0	0	0	0	0	0	0	0	0	0	0	0	0	0	0	0	0	0	0	0	0	0	0	0	0	0	0	0	0.0844595	0	0	0	0	0	0	0	0	0	0	0	0.253378	0	0	0	0
Otu08657	0	0	0	0	0	0	0	0	0	0	0	0	0	0	0	0	0	0	0	0	0	0	0	0	0	0	0	0	0	0	0	0	0	0	0	0	0	0	0	0	0	0	0	0	0	0	0	0	0
Otu03562	0	0	0	0	0	0	0	0	0	0	0	0	0	0	0	0	0	0.337838	0	0	0	0	0	0	0	0	0	0	0	0	0	0	0	0	0	0	0	0	0	0	0	0	0	0	0	0	0	0	0
Otu00663	0	0	0.0844595	0	0	0	0	0	0	0	0	0	0	0	0	0	0	0	0	0	0	0	0	0	0	0	0	0	0.168919	0	0	0	0	0	0	0	0	0	0	0	0	0	0	0	0	0	0	0	0
Otu01976	0	0	0	0	0	0	0	0	0	0	0	0	0	0	0	0	0	0	0	0	0	0	0	0	0	0	0.0844595	0	0	0	0	0	0.0844595	0	0	0	0	0	0	0	0	0	0	0	0	0	0	0	0
Otu03801	0	0	0	0	0	0	0	0	0	0	0	0	0	0	0	0	0	0	0.253378	0	0	0	0	0	0	0	0	0	0	0	0	0	0	0	0	0	0	0	0	0	0	0	0	0	0	0	0	0	0
Otu00676	0	0	0	0	0	0	0	0.0844595	0	0	0	0	0	0	0	0	0	0.0844595	0	0	0	0	0	0	0	0	0	0	0	0	0	0	0	0	0	0	0	0	0	0	0	0	0	0	0	0	0	0	0
Otu00848	0	0	0	0	0	0	0	0	0	0	0	0	0	0	0	0	0	0.168919	0	0	0	0	0	0	0	0	0	0	0	0	0	0	0	0	0	0	0	0	0	0	0	0	0	0	0	0	0	0	0
Otu01622	0	0	0	0	0	0	0	0	0	0	0	0.168919	0	0	0	0	0	0	0	0	0	0	0	0	0	0	0	0	0	0	0	0	0	0	0	0	0	0	0	0	0	0	0	0	0	0	0	0	0
Otu03398	0	0	0	0	0	0	0	0	0	0	0	0	0	0	0	0	0.0844595	0.0844595	0	0	0	0	0	0	0	0	0	0	0	0	0	0	0	0	0	0	0	0	0	0	0	0	0	0	0	0	0	0	0
Otu04619	0	0	0	0	0	0	0	0	0	0	0	0	0	0	0	0	0	0	0	0	0	0	0.0844595	0	0	0	0	0	0	0	0	0	0	0	0	0	0	0	0.0844595	0	0	0	0	0	0	0	0	0	0
Otu00317	0	0	0	0.0844595	0	0	0	0	0	0	0	0	0	0	0	0	0	0	0	0	0	0	0	0	0	0	0	0	0	0	0	0	0	0	0	0	0	0	0	0	0	0	0	0	0	0	0	0	0
Otu00492	0	0	0	0	0	0	0	0.0844595	0	0	0	0	0	0	0	0	0	0	0	0	0	0	0	0	0	0	0	0	0	0	0	0	0	0	0	0	0	0	0	0	0	0	0	0	0	0	0	0	0
Otu00525	0	0	0	0	0	0	0	0	0	0	0	0	0	0	0	0	0	0.0844595	0	0	0	0	0	0	0	0	0	0	0	0	0	0	0	0	0	0	0	0	0	0	0	0	0	0	0	0	0	0	0
Otu00804	0	0	0	0	0	0	0	0	0	0	0	0	0	0	0	0	0	0.0844595	0	0	0	0	0	0	0	0	0	0	0	0	0	0	0	0	0	0	0	0	0	0	0	0	0	0	0	0	0	0	0
Otu01023	0	0	0	0	0	0	0	0	0	0	0	0	0	0	0	0	0	0	0	0	0	0	0.0844595	0	0	0	0	0	0	0	0	0	0	0	0	0	0	0	0	0	0	0	0	0	0	0	0	0	0
Otu01952	0	0	0	0	0.0844595	0	0	0	0	0	0	0	0	0	0	0	0	0	0	0	0	0	0	0	0	0	0	0	0	0	0	0	0	0	0	0	0	0	0	0	0	0	0	0	0	0	0	0	0
Otu05509	0	0	0	0	0	0	0	0	0	0	0	0	0	0	0	0	0	0	0	0	0	0	0	0	0	0	0	0	0	0	0.0844595	0	0	0	0	0	0	0	0	0	0	0	0	0	0	0	0	0	0
Otu09599	0	0	0	0	0	0	0	0	0	0	0	0	0	0	0	0	0	0	0	0	0	0	0	0	0	0	0	0	0	0	0	0	0	0	0	0	0	0	0	0	0	0	0	0	0	0	0	0	0
Otu00724	0	0	0	0	0.0844595	0	0	0.0844595	0	0	0	0	0	0	0	0	0	0.253378	0	0	0	0	0	0	0	0	0	0	0.168919	0	0	0	0	0	0	0	0	0	0	0	0	0	0	0	0	0	0	0	0
Otu03652	0	0	0	0	0	0	0	0	0	0	0	0	0	0	0	0	0	0	0	0	0	0	0.0844595	0	0	0	0	0	0	0	0	0	0	0	0	0	0	0	0	0	0	0	0	0	0	0	0	0	0
Otu00024	1.18243	1.85811	0	1.85811	3.46284	1.94257	0.760135	1.18243	0	0	0.675676	1.01351	2.11149	0.929054	0.0844595	4.56081	1.68919	1.18243	0.675676	0	0.168919	0.253378	1.85811	0.168919	0	0.168919	0	0.675676	2.7027	0.0844595	0.337838	0.506757	0.337838	0.591216	0.253378	5.91216	1.35135	0.675676	1.60473	1.09797	0.591216	0.253378	2.28041	0.591216	0.422297	1.09797	0.168919	0.337838	0.0844595
Otu00185	0	0.0844595	0	0.0844595	0.168919	0.337838	0	0	0	0	0	0	0	0.0844595	0	0.253378	0.337838	0	0	0	0	0	0	0	0.253378	0	0	0	0	0	0	0	0.168919	0	0	0.337838	0	0.253378	0	0.168919	0.760135	0	0.591216	0.253378	1.43581	0.168919	0	0	0
Otu01479	0	0	0	0.168919	0	0	0	0	0	0	0	0	0	0	0	0	0	0	0	0	0	0	0	0	0	0	0	0	0	0	0	0	0	0	0	0	0	0	0	0	0	0	0.422297	0	0	0	0.0844595	0	0.0844595
Otu00082	0.0844595	0.0844595	0	0.168919	0	0	0.0844595	0	0	0	0	0.253378	0	0	0	0	0	0.0844595	0	0	0	0	0	0	0	0	0	0	0	0	0	0	0	0	0	0	0	0	0	0.0844595	0	0	0	0	0	0	0	0	0
Otu07081	0	0	0	0	0	0	0	0	0	0	0	0	0	0	0	0	0	0	0	0	0	0	0	0	0	0	0	0	0	0	0	0	0	0	0	0	0	0.168919	0	0	0	0	0	0	0	0	0	0	0
Otu00473	0	0	0	0	0	0	0	0.168919	0	0	0	0	0	0	0	0	0	0	0	0	0	0	0	0	0	0	0	0	0	0	0	0	0	0	0	0	0	0	0	0	0	0	0	0	0	0	0	0	0
Otu01625	0	0	0	0	0	0	0	0	0	0	0.0844595	0	0	0	0	0	0	0	0	0	0	0	0	0	0	0	0	0	0	0	0	0	0	0	0	0	0	0	0	0	0	0	0	0	0	0	0	0	0
Otu04244	0	0	0	0	0	0	0	0	0	0	0	0	0	0	0	0	0	0	0.0844595	0	0	0	0	0	0	0	0	0	0	0	0	0	0	0	0	0	0	0	0	0	0	0	0	0	0	0	0	0	0
Otu00428	0	0	0	0	0	0	0	0.422297	0	0	0.0844595	0	0	0.0844595	0	0	0.844595	2.7027	0.0844595	0	0	0	4.89865	0	0	0	0	0	1.77365	0	0	0	0.0844595	0	0.337838	0	0.844595	0	0	0	0	0	0	0	0	0	0	0	0
Otu00468	0	0	0	0	0	0	0	0.168919	0	0	0.0844595	0.168919	0	0	0	0	0.168919	1.09797	0	0	0	0	1.09797	0	0	0	0	0	0.0844595	0	0	0.0844595	0	0	0	0	0.422297	0	0	0	0	0	0	0	0	0	0	0	0
Otu01294	0	0	0	0	0	0	0	0	0	0	0	0	0	0	0	0	0	0.0844595	0	0	0	0	0.760135	0	0	0	0	0	0.0844595	0	0	0	0	0	0.0844595	0	0	0	0	0	0	0	0	0	0	0	0	0	0
Otu10962	0	0	0	0	0	0	0	0	0	0	0	0	0	0	0	0	0	0	0	0	0	0	0	0	0	0	0	0	0	0	0	0	0	0	0	0	0	0	0	0	0.337838	0	0	0	0	0	0	0	0
Otu02026	0	0	0	0	0	0	0	0	0	0	0	0	0	0	0	0.253378	0	0	0	0	0	0	0	0	0	0	0	0	0	0	0	0	0	0	0	0	0	0	0	0	0	0	0	0	0	0	0	0	0
Otu08608	0	0	0	0	0	0	0	0	0	0	0	0	0	0	0	0	0	0	0	0	0	0	0	0	0	0	0	0	0	0	0	0	0	0	0	0	0	0	0	0	0	0	0	0	0	0	0	0	0
Otu00554	0	0	0	0	0	0	0	0	0	0	0	0	0	0	0	0	0	0	0	0	0	0	0	0	0	0	0	0	0	0	0	0	0	0	0	0	0	0	0	0	0	0	0	0	0	0	0	0	0
Otu00856	0	0	0	0	0	0	0	0.0844595	0	0	0	0	0	0	0	0	0	0	0	0	0	0	0	0	0	0	0	0	0	0	0	0	0	0	0	0	0	0	0	0	0	0	0	0	0	0	0	0	0
Otu04591	0	0	0	0	0	0	0	0	0	0	0	0	0	0	0	0	0	0	0	0	0	0	0	0	0	0	0	0	0	0	0	0	0	0	0	0	0	0	0	0	0	0.0844595	0	0	0	0	0	0	0
Otu04846	0	0	0	0	0	0	0	0	0	0	0	0	0	0	0	0	0	0	0	0	0	0	0	0	0	0.0844595	0	0	0	0	0	0	0	0	0	0	0	0	0	0	0	0	0	0	0	0	0	0	0
Otu06588	0	0	0	0	0	0	0	0	0	0	0	0.0844595	0	0	0	0	0	0	0	0	0	0	0	0	0	0	0	0	0	0	0	0	0	0	0	0	0	0	0	0	0	0	0	0	0	0	0	0	0
Otu03475	0	0	0	0	0	0	0	0	0	0	0	0	0	0	0	0	0.0844595	0	0	0	0	0	0	0	0	0	0	0	0	0	0	0	0	0	0	0	0	0	0	0	0	0	0	0	0	0	0	0	0
Otu06689	0	0	0	0	0	0	0	0	0	0	0	0	0.0844595	0	0	0	0	0	0	0	0	0	0	0	0	0	0	0	0	0	0	0	0	0	0	0	0	0	0	0	0	0	0	0	0	0	0	0	0
Otu06349	0	0	0	0	0	0	0	0	0	0	0	0	0	0	0	0	0	0	0	0	0	0	0	0	0	0	0	0	0	0	0	0	0	0	0	0	0.0844595	0	0	0	0	0	0	0	0	0	0	0	0
Otu07503	0	0	0	0	0	0	0	0	0	0	0	0	0	0	0	0	0	0	0	0	0	0	0	0	0	0	0	0	0	0	0	0	0	0	0	0	0	0	0	0	0	0	0.0844595	0	0	0	0	0	0
Otu00441	0	0	0	0	0	0	0	0.0844595	0	0	0	0	0	0	0	0	0	0	0	0	0	0	0	0	0	0	0	0	0	0	0	0	0	0	0	0	0	0	0	0	0	0	0	0	0	0	0	0	0
Otu01212	0	0.0844595	0	0	0	0	0	0	0	0	0	0	0	0	0	0	0	0	0	0	0	0	0	0	0	0	0	0	0	0	0	0	0	0	0	0	0	0	0	0	0	0	0	0	0	0	0	0	0
Otu06722	0	0	0	0	0	0	0	0	0	0	0	0	0	0	0	0.0844595	0	0	0	0	0	0	0	0	0	0	0	0	0	0	0	0	0	0	0	0	0	0	0	0	0	0	0	0	0	0	0	0	0
Otu00595	0	0	0	0	0	0	0	0.0844595	0	0	0	0	0	0	0	0	0	0	0	0	0	0	0	0	0	0	0	0	0	0	0	0	0	0	0	0	0	0	0	0	0	0	0	0	0	0	0	0	0
Otu03909	0	0	0	0	0	0	0	0	0	0	0	0	0	0	0	0	0	0	0	0	0	0	0.0844595	0	0	0	0	0	0	0	0	0	0	0	0	0	0	0	0	0	0	0	0	0	0	0	0	0	0
Otu00424	0	0	0	0	0	0	0	0.168919	0	0	0	0	0	0	0	0	0	0	0	0	0	0	0	0	0	0	0	0	0	0	0	0	0	0	0	0	0	0	0	0	0	0	0	0	0	0	0	0	0
Otu02318	0	0	0	0	0.0844595	0	0	0	0	0	0	0	0	0	0	0	0	0	0	0	0	0	0	0	0	0	0	0	0	0	0	0	0	0	0	0	0	0	0	0	0	0	0	0	0	0	0	0	0
Otu06630	0	0	0	0	0	0	0	0	0	0	0	0.0844595	0	0	0	0	0	0	0	0	0	0	0	0	0	0	0	0	0	0	0	0	0	0	0	0	0	0	0	0	0	0	0	0	0	0	0	0	0
Otu02299	0	0	0	0	0	0	0	0	0	0	0	0	0	0	0	0.0844595	0	0	0	0	0	0	0	0	0.0844595	0	0	0	0	0	0	0	0	0	0	0	0	0	0	0	0	0	0	0	0	0	0	0	0
Otu00453	0	0	0	0.253378	0.168919	0	0	0.168919	0	0	0	0.0844595	0	0.0844595	0	0.422297	0.168919	3.46284	0.422297	0	0.0844595	0	5.40541	0	0	0	0	0	0.253378	0.0844595	0	0	0	0	0.0844595	0	1.77365	0	0	0	0	0	0	0	0	0	0	0	0
Otu01079	0	0	0	0	0.0844595	0	0	0	0	0	0	0	0	0	0	0	0.422297	1.09797	0	0	0	0	3.20946	0	0	0	0	0	0.0844595	0	0	0	0	0	0.0844595	0	0.253378	0	0	0	0	0	0.168919	0	0	0	0	0	0
Otu03566	0	0	0	0	0	0	0	0	0	0	0	0	0	0	0	0	0	0.591216	0	0	0	0	2.19595	0	0	0	0	0	0.0844595	0	0	0	0	0	0	0	0.0844595	0	0	0	0	0	0	0	0	0	0	0	0
Otu03331	0	0	0	0	0	0	0	0	0	0	0	0.0844595	0	0.0844595	0	0	0.0844595	0.844595	0	0	0	0	1.09797	0	0	0	0	0	0.168919	0	0	0	0	0	0	0	0.0844595	0	0	0	0	0	0	0	0	0	0	0	0
Otu03328	0	0	0	0	0	0	0	0	0	0	0	0	0	0.0844595	0	0	0.168919	0.929054	0	0	0	0	0.591216	0	0	0	0	0	0	0	0	0	0	0	0.0844595	0	0.0844595	0	0	0	0	0	0	0	0	0	0	0	0
Otu03392	0	0	0	0	0	0	0	0	0	0	0	0	0	0	0	0	0.0844595	0.591216	0	0	0	0	0.929054	0	0	0	0	0	0	0	0	0	0	0	0	0	0	0	0	0	0	0	0	0	0	0	0	0	0
Otu00142	0	0	0	0	1.52027	0	0	0	0	0	0	0	0	0	0	0	0	0	0	0	0	0	0	0	0	0	0	0	0	0	0	0	0	0	0	0	0	0	0	0	0	0	0	0	0	0	0	0	0
Otu03578	0	0	0	0	0	0	0	0	0	0	0	0	0	0	0	0	0	0.0844595	0.168919	0	0	0	1.01351	0	0	0	0	0	0	0	0	0	0	0	0	0	0.0844595	0	0	0	0	0	0	0	0	0	0	0	0
Otu03768	0	0	0	0	0	0	0	0	0	0	0	0	0	0	0	0	0	0.422297	0	0	0	0	0.844595	0	0	0	0	0	0	0	0	0	0	0	0	0	0	0	0	0	0	0	0	0	0	0	0	0	0
Otu01209	0	0.0844595	0	0.0844595	0.760135	0	0	0	0	0	0	0	0.0844595	0	0	0	0	0	0	0	0	0	0	0	0	0	0	0	0	0	0	0	0	0	0	0	0.0844595	0	0	0	0	0	0	0	0	0	0	0	0
Otu03308	0	0	0	0	0	0	0	0	0	0	0	0	0	0	0	0	0.253378	0.0844595	0	0	0	0	0.760135	0	0	0	0	0	0	0	0	0	0	0	0	0	0	0	0	0	0	0	0	0	0	0	0	0	0
Otu03788	0	0	0	0	0	0	0	0	0	0	0	0	0	0	0	0	0	0	0	0	0	0	0.844595	0	0	0	0	0	0	0	0	0	0	0	0	0	0.0844595	0	0	0	0	0	0	0	0	0	0	0	0
Otu01002	0	0	0	0	0	0	0	0.0844595	0	0	0	0	0	0.0844595	0	0	0	0.168919	0	0	0	0	0.253378	0.0844595	0	0	0	0	0	0	0	0	0	0	0	0	0.168919	0	0	0	0	0	0	0	0	0	0	0	0
Otu03304	0	0	0	0	0	0	0	0	0	0	0	0	0	0	0	0	0.168919	0.168919	0	0	0	0	0.422297	0	0	0	0	0	0.0844595	0	0	0	0	0	0	0	0	0	0	0	0	0	0	0	0	0	0	0	0
Otu00483	0	0	0	0	0	0.0844595	0	0.0844595	0	0	0	0	0	0	0	0.591216	0	0	0	0	0	0	0	0	0	0	0	0	0	0	0	0	0	0	0	0	0	0	0	0	0	0	0	0	0	0	0	0	0
Otu00794	0	0	0	0	0	0	0	0	0	0	0	0	0	0	0	0.675676	0	0	0	0	0	0	0	0	0	0	0	0	0	0	0	0	0	0	0	0	0	0	0	0	0	0	0	0	0	0	0	0	0
Otu03586	0	0	0	0	0	0	0	0	0	0	0	0	0	0.0844595	0	0	0	0.168919	0	0	0	0	0.337838	0	0	0	0	0	0	0	0	0	0	0	0	0	0	0	0	0	0	0	0	0	0	0	0	0	0
Otu03598	0	0	0	0	0	0	0	0	0	0	0	0.0844595	0	0	0	0	0	0.0844595	0	0	0	0	0.253378	0	0	0	0	0	0.168919	0	0	0	0	0	0.0844595	0	0	0	0	0	0	0	0	0	0	0	0	0	0
Otu03585	0	0	0	0	0	0	0	0	0	0	0	0	0	0	0	0	0	0.337838	0	0	0	0	0.253378	0	0	0	0	0	0	0	0	0	0	0	0	0	0	0	0	0	0	0	0	0	0	0	0	0	0
Otu03635	0	0	0	0	0	0	0	0	0	0	0	0	0	0	0	0	0	0.253378	0	0	0	0	0.337838	0	0	0	0	0	0	0	0	0	0	0	0	0	0	0	0	0	0	0	0	0	0	0	0	0	0
Otu00968	0	0	0	0	0	0.168919	0	0	0	0	0	0	0	0	0	0	0	0.168919	0	0	0	0	0.0844595	0	0	0	0	0	0	0	0	0	0	0	0	0	0.0844595	0	0	0	0	0	0	0	0	0	0	0	0
Otu01511	0	0	0	0	0.168919	0	0	0	0	0	0	0.253378	0	0	0	0.0844595	0	0	0	0	0	0	0	0	0	0	0	0	0	0	0	0	0	0	0	0	0	0	0	0	0	0	0	0	0	0	0	0	0
Otu03564	0	0	0	0	0	0	0	0	0	0	0	0	0	0	0	0	0	0.253378	0	0	0	0	0.168919	0	0	0	0	0	0.0844595	0	0	0	0	0	0	0	0	0	0	0	0	0	0	0	0	0	0	0	0
Otu00812	0	0	0	0	0	0	0	0	0	0	0	0	0	0	0	0.422297	0	0	0	0	0	0	0	0	0	0	0	0	0	0	0	0	0	0	0	0	0	0	0	0	0	0	0	0	0	0	0	0	0
Otu03373	0	0	0	0	0	0	0	0	0	0	0	0	0	0	0	0	0	0.337838	0	0	0	0	0	0	0	0	0	0	0	0	0	0	0	0	0	0	0.0844595	0	0	0	0	0	0	0	0	0	0	0	0
Otu03603	0	0	0	0	0	0	0	0	0	0	0	0	0	0	0	0.253378	0	0.0844595	0	0	0	0	0	0	0	0	0	0	0.0844595	0	0	0	0	0	0	0	0	0	0	0	0	0	0	0	0	0	0	0	0
Otu03853	0	0	0	0	0	0	0	0	0	0	0	0	0	0	0	0	0	0.168919	0	0	0	0	0.168919	0	0	0	0	0	0	0	0	0	0	0	0	0	0.0844595	0	0	0	0	0	0	0	0	0	0	0	0
Otu04587	0	0	0	0	0	0	0	0	0	0	0	0	0	0	0	0.253378	0	0	0	0	0	0	0.0844595	0	0	0	0	0	0	0	0	0	0	0	0	0	0.0844595	0	0	0	0	0	0	0	0	0	0	0	0
Otu00452	0	0	0	0.0844595	0	0	0	0	0	0	0	0.253378	0	0	0	0	0	0	0	0	0	0	0	0	0	0	0	0	0	0	0	0	0	0	0	0	0	0	0	0	0	0	0	0	0	0	0	0	0
Otu00660	0	0	0	0.253378	0	0	0	0.0844595	0	0	0	0	0	0	0	0	0	0	0	0	0	0	0	0	0	0	0	0	0	0	0	0	0	0	0	0	0	0	0	0	0	0	0	0	0	0	0	0	0
Otu00787	0	0	0	0	0	0.0844595	0	0.0844595	0	0	0	0	0	0	0	0.168919	0	0	0	0	0	0	0	0	0	0	0	0	0	0	0	0	0	0	0	0	0	0	0	0	0	0	0	0	0	0	0	0	0
Otu01913	0	0	0	0	0	0.0844595	0	0	0	0	0	0	0	0	0	0	0.0844595	0.0844595	0	0	0	0	0.0844595	0	0	0	0	0	0	0	0	0	0	0	0	0	0	0	0	0	0	0	0	0	0	0	0	0	0
Otu03731	0	0	0	0	0	0	0	0	0	0	0	0	0	0	0	0	0	0.0844595	0	0	0	0	0.168919	0	0	0	0	0	0	0	0	0	0	0	0	0	0.0844595	0	0	0	0	0	0	0	0	0	0	0	0
Otu03765	0	0	0	0	0	0	0	0	0	0	0	0	0	0	0	0	0	0.168919	0	0	0	0	0.168919	0	0	0	0	0	0	0	0	0	0	0	0	0	0	0	0	0	0	0	0	0	0	0	0	0	0
Otu04582	0	0	0	0	0	0	0	0	0	0	0	0	0	0	0	0	0	0	0	0	0	0	0.168919	0	0	0	0	0	0.0844595	0	0	0	0	0	0	0	0.0844595	0	0	0	0	0	0	0	0	0	0	0	0
Otu00423	0	0	0	0	0	0	0	0.253378	0	0	0	0	0	0	0	0	0	0	0	0	0	0	0	0	0	0	0	0	0	0	0	0	0	0	0	0	0	0	0	0	0	0	0	0	0	0	0	0	0
Otu01405	0	0	0	0.168919	0	0	0	0	0	0	0	0	0	0	0	0	0	0	0	0	0	0	0	0	0	0	0	0	0	0	0	0	0	0	0	0	0.0844595	0	0	0	0	0	0	0	0	0	0	0	0
Otu01436	0	0	0	0.0844595	0.168919	0	0	0	0	0	0	0	0	0	0	0	0	0	0	0	0	0	0	0	0	0	0	0	0	0	0	0	0	0	0	0	0	0	0	0	0	0	0	0	0	0	0	0	0
Otu01721	0	0	0	0	0	0	0	0	0	0	0	0	0.0844595	0	0	0.168919	0	0	0	0	0	0	0	0	0	0	0	0	0	0	0	0	0	0	0	0	0	0	0	0	0	0	0	0	0	0	0	0	0
Otu02013	0	0	0	0	0.168919	0	0	0	0	0	0	0	0	0	0	0	0	0	0	0	0	0	0.0844595	0	0	0	0	0	0	0	0	0	0	0	0	0	0	0	0	0	0	0	0	0	0	0	0	0	0
Otu03448	0	0	0	0	0	0	0	0	0	0	0	0	0	0	0	0	0.0844595	0	0	0	0	0	0.168919	0	0	0	0	0	0	0	0	0	0	0	0	0	0	0	0	0	0	0	0	0	0	0	0	0	0
Otu03525	0	0	0	0	0	0	0	0	0	0	0	0	0	0	0	0	0.0844595	0	0	0	0	0	0.0844595	0	0	0	0	0	0	0	0	0	0	0	0	0	0	0	0	0	0	0	0	0	0	0	0	0	0
Otu03642	0	0	0	0	0	0	0	0	0	0	0	0	0	0	0	0	0	0.0844595	0	0	0	0	0.168919	0	0	0	0	0	0	0	0	0	0	0	0	0	0	0	0	0	0	0	0	0	0	0	0	0	0
Otu03745	0	0	0	0	0	0	0	0	0	0	0	0	0	0	0	0	0	0.0844595	0	0	0	0	0.168919	0	0	0	0	0	0	0	0	0	0	0	0	0	0	0	0	0	0	0	0	0	0	0	0	0	0
Otu03748	0	0	0	0	0	0	0	0	0	0	0	0	0	0	0	0	0	0	0	0	0	0	0	0	0	0	0	0	0.0844595	0	0	0	0	0	0	0	0.168919	0	0	0	0	0	0	0	0	0	0	0	0
Otu03764	0	0	0	0	0	0	0	0	0	0	0	0	0	0	0	0	0	0.0844595	0	0	0	0	0.168919	0	0	0	0	0	0	0	0	0	0	0	0	0	0	0	0	0	0	0	0	0	0	0	0	0	0
Otu04578	0	0	0	0	0	0	0	0	0	0	0	0	0	0	0	0	0	0	0	0	0	0	0.253378	0	0	0	0	0	0	0	0	0	0	0	0	0	0	0	0	0	0	0	0	0	0	0	0	0	0
Otu06530	0	0	0	0	0	0	0	0	0	0	0	0.253378	0	0	0	0	0	0	0	0	0	0	0	0	0	0	0	0	0	0	0	0	0	0	0	0	0	0	0	0	0	0	0	0	0	0	0	0	0
Otu06852	0	0	0	0	0	0	0	0	0	0	0	0	0	0	0	0.253378	0	0	0	0	0	0	0	0	0	0	0	0	0	0	0	0	0	0	0	0	0	0	0	0	0	0	0	0	0	0	0	0	0
Otu00564	0	0	0	0	0	0	0	0.168919	0	0	0	0	0	0	0	0	0	0	0	0	0	0	0	0	0	0	0	0	0	0	0	0	0	0	0	0	0	0	0	0	0	0	0	0	0	0	0	0	0
Otu01005	0	0	0	0	0.168919	0	0	0	0	0	0	0	0	0	0	0	0	0	0	0	0	0	0	0	0	0	0	0	0	0	0	0	0	0	0	0	0	0	0	0	0	0	0	0	0	0	0	0	0
Otu01383	0	0	0	0.168919	0	0	0	0	0	0	0	0	0	0	0	0	0	0	0	0	0	0	0	0	0	0	0	0	0	0	0	0	0	0	0	0	0	0	0	0	0	0	0	0	0	0	0	0	0
Otu01393	0	0	0	0.168919	0	0	0	0	0	0	0	0	0	0	0	0	0	0	0	0	0	0	0	0	0	0	0	0	0	0	0	0	0	0	0	0	0	0	0	0	0	0	0	0	0	0	0	0	0
Otu01463	0	0	0	0.0844595	0.0844595	0	0	0	0	0	0	0	0	0	0	0	0	0	0	0	0	0	0	0	0	0	0	0	0	0	0	0	0	0	0	0	0	0	0	0	0	0	0	0	0	0	0	0	0
Otu01518	0	0	0	0.0844595	0	0	0	0	0	0	0	0	0	0.0844595	0	0	0	0	0	0	0	0	0	0	0	0	0	0	0	0	0	0	0	0	0	0	0	0	0	0	0	0	0	0	0	0	0	0	0
Otu01922	0	0	0	0	0.168919	0	0	0	0	0	0	0	0	0	0	0	0	0	0	0	0	0	0	0	0	0	0	0	0	0	0	0	0	0	0	0	0	0	0	0	0	0	0	0	0	0	0	0	0
Otu01966	0	0	0	0	0.0844595	0	0	0	0	0	0	0.0844595	0	0	0	0	0	0	0	0	0	0	0	0	0	0	0	0	0	0	0	0	0	0	0	0	0	0	0	0	0	0	0	0	0	0	0	0	0
Otu02056	0	0	0	0	0.168919	0	0	0	0	0	0	0	0	0	0	0	0	0	0	0	0	0	0	0	0	0	0	0	0	0	0	0	0	0	0	0	0	0	0	0	0	0	0	0	0	0	0	0	0
Otu02410	0	0	0	0	0	0.0844595	0	0	0	0	0	0	0	0	0	0	0	0	0	0	0	0	0	0	0	0	0	0	0.0844595	0	0	0	0	0	0	0	0	0	0	0	0	0	0	0	0	0	0	0	0
Otu03337	0	0	0	0	0	0	0	0	0	0	0	0	0	0	0	0	0.0844595	0.0844595	0	0	0	0	0	0	0	0	0	0	0	0	0	0	0	0	0	0	0	0	0	0	0	0	0	0	0	0	0	0	0
Otu03595	0	0	0	0	0	0	0	0	0	0	0	0	0	0	0	0	0	0.168919	0	0	0	0	0	0	0	0	0	0	0	0	0	0	0	0	0	0	0	0	0	0	0	0	0	0	0	0	0	0	0
Otu03634	0	0	0	0	0	0	0	0	0	0	0	0	0	0	0	0	0	0.0844595	0	0	0	0	0.0844595	0	0	0	0	0	0	0	0	0	0	0	0	0	0	0	0	0	0	0	0	0	0	0	0	0	0
Otu03648	0	0	0	0	0	0	0	0	0	0	0	0.0844595	0.0844595	0	0	0	0	0	0	0	0	0	0	0	0	0	0	0	0	0	0	0	0	0	0	0	0	0	0	0	0	0	0	0	0	0	0	0	0
Otu03785	0	0	0	0	0	0	0	0	0	0	0	0	0	0	0	0	0	0	0.0844595	0	0	0	0.0844595	0	0	0	0	0	0	0	0	0	0	0	0	0	0	0	0	0	0	0	0	0	0	0	0	0	0
Otu03864	0	0	0	0	0	0	0	0	0	0	0	0	0	0	0	0	0	0.168919	0	0	0	0	0	0	0	0	0	0	0	0	0	0	0	0	0	0	0	0	0	0	0	0	0	0	0	0	0	0	0
Otu04581	0	0	0	0	0	0	0	0	0	0	0	0	0	0	0	0	0	0	0	0	0	0	0.168919	0	0	0	0	0	0	0	0	0	0	0	0	0	0	0	0	0	0	0	0	0	0	0	0	0	0
Otu06111	0	0	0	0	0	0	0	0	0	0	0	0.168919	0	0	0	0	0	0	0	0	0	0	0	0	0	0	0	0	0	0	0	0	0	0	0	0	0	0	0	0	0	0	0	0	0	0	0	0	0
Otu06543	0	0	0	0	0	0	0	0	0	0	0	0.168919	0	0	0	0	0	0	0	0	0	0	0	0	0	0	0	0	0	0	0	0	0	0	0	0	0	0	0	0	0	0	0	0	0	0	0	0	0
Otu06940	0	0	0	0	0	0	0	0	0	0	0	0	0	0	0	0.168919	0	0	0	0	0	0	0	0	0	0	0	0	0	0	0	0	0	0	0	0	0	0	0	0	0	0	0	0	0	0	0	0	0
Otu00540	0	0	0	0	0	0	0	0.0844595	0	0	0	0	0	0	0	0	0	0	0	0	0	0	0	0	0	0	0	0	0	0	0	0	0	0	0	0	0	0	0	0	0	0	0	0	0	0	0	0	0
Otu00699	0	0	0	0	0	0	0	0.0844595	0	0	0	0	0	0	0	0	0	0	0	0	0	0	0	0	0	0	0	0	0	0	0	0	0	0	0	0	0	0	0	0	0	0	0	0	0	0	0	0	0
Otu00915	0	0	0	0	0	0	0	0.0844595	0	0	0	0	0	0	0	0	0	0	0	0	0	0	0	0	0	0	0	0	0	0	0	0	0	0	0	0	0	0	0	0	0	0	0	0	0	0	0	0	0
Otu01536	0	0	0	0	0	0	0	0	0	0	0	0	0	0	0	0	0	0	0	0	0	0	0	0	0	0	0	0	0	0	0	0	0	0	0	0	0	0	0	0	0	0	0	0	0	0	0	0	0
Otu02080	0	0	0	0	0	0	0	0	0	0	0	0	0	0	0	0	0	0	0	0	0	0	0.0844595	0	0	0	0	0	0	0	0	0	0	0	0	0	0	0	0	0	0	0	0	0	0	0	0	0	0
Otu02213	0	0	0	0	0	0	0	0	0	0	0	0	0	0	0	0	0	0	0	0	0	0	0	0	0	0	0	0	0	0	0	0	0	0	0	0	0.0844595	0	0	0	0	0	0	0	0	0	0	0	0
Otu02248	0	0	0	0	0.0844595	0	0	0	0	0	0	0	0	0	0	0	0	0	0	0	0	0	0	0	0	0	0	0	0	0	0	0	0	0	0	0	0	0	0	0	0	0	0	0	0	0	0	0	0
Otu02473	0	0	0	0	0	0	0	0	0	0	0	0	0	0	0	0	0	0	0	0	0	0	0.0844595	0	0	0	0	0	0	0	0	0	0	0	0	0	0	0	0	0	0	0	0	0	0	0	0	0	0
Otu03200	0	0	0	0	0	0	0	0	0	0	0.0844595	0	0	0	0	0	0	0	0	0	0	0	0	0	0	0	0	0	0	0	0	0	0	0	0	0	0	0	0	0	0	0	0	0	0	0	0	0	0
Otu03410	0	0	0	0	0	0	0	0	0	0	0	0	0	0	0	0	0.0844595	0	0	0	0	0	0	0	0	0	0	0	0	0	0	0	0	0	0	0	0	0	0	0	0	0	0	0	0	0	0	0	0
Otu03452	0	0	0	0	0	0	0	0	0	0	0	0	0	0	0	0	0.0844595	0	0	0	0	0	0	0	0	0	0	0	0	0	0	0	0	0	0	0	0	0	0	0	0	0	0	0	0	0	0	0	0
Otu03588	0	0	0	0	0	0	0	0	0	0	0	0	0	0	0	0	0	0.0844595	0	0	0	0	0	0	0	0	0	0	0	0	0	0	0	0	0	0	0	0	0	0	0	0	0	0	0	0	0	0	0
Otu03617	0	0	0	0	0	0	0	0	0	0	0	0	0	0	0	0	0	0.0844595	0	0	0	0	0	0	0	0	0	0	0	0	0	0	0	0	0	0	0	0	0	0	0	0	0	0	0	0	0	0	0
Otu03658	0	0	0	0	0	0	0	0	0	0	0	0	0	0	0	0	0	0	0	0	0	0	0.0844595	0	0	0	0	0	0	0	0	0	0	0	0	0	0	0	0	0	0	0	0	0	0	0	0	0	0
Otu03678	0	0	0	0	0	0	0	0	0	0	0	0	0	0	0	0	0	0	0	0	0	0	0.0844595	0	0	0	0	0	0	0	0	0	0	0	0	0	0	0	0	0	0	0	0	0	0	0	0	0	0
Otu03763	0	0	0	0	0	0	0	0	0	0	0	0	0	0	0	0	0	0	0	0	0	0	0.0844595	0	0	0	0	0	0	0	0	0	0	0	0	0	0	0	0	0	0	0	0	0	0	0	0	0	0
Otu03818	0	0	0	0	0	0	0	0	0	0	0	0	0	0	0	0	0	0.0844595	0	0	0	0	0	0	0	0	0	0	0	0	0	0	0	0	0	0	0	0	0	0	0	0	0	0	0	0	0	0	0
Otu03855	0	0	0	0	0	0	0	0	0	0	0	0	0	0	0	0	0	0	0	0	0.0844595	0	0	0	0	0	0	0	0	0	0	0	0	0	0	0	0	0	0	0	0	0	0	0	0	0	0	0	0
Otu03890	0	0	0	0	0	0	0	0	0	0	0	0	0	0	0	0	0	0.0844595	0	0	0	0	0	0	0	0	0	0	0	0	0	0	0	0	0	0	0	0	0	0	0	0	0	0	0	0	0	0	0
Otu03903	0	0	0	0	0	0	0	0	0	0	0	0	0	0	0	0	0	0.0844595	0	0	0	0	0	0	0	0	0	0	0	0	0	0	0	0	0	0	0	0	0	0	0	0	0	0	0	0	0	0	0
Otu03990	0	0	0	0	0	0	0	0	0	0	0	0	0	0	0	0	0	0.0844595	0	0	0	0	0	0	0	0	0	0	0	0	0	0	0	0	0	0	0	0	0	0	0	0	0	0	0	0	0	0	0
Otu04005	0	0	0	0	0	0	0	0	0	0	0	0	0	0	0	0	0	0	0	0	0	0	0.0844595	0	0	0	0	0	0	0	0	0	0	0	0	0	0	0	0	0	0	0	0	0	0	0	0	0	0
Otu04247	0	0	0	0	0	0	0	0	0	0	0	0	0	0	0	0	0	0	0.0844595	0	0	0	0	0	0	0	0	0	0	0	0	0	0	0	0	0	0	0	0	0	0	0	0	0	0	0	0	0	0
Otu04598	0	0	0	0	0	0	0	0	0	0	0	0	0	0	0	0	0	0	0	0	0	0	0.0844595	0	0	0	0	0	0	0	0	0	0	0	0	0	0	0	0	0	0	0	0	0	0	0	0	0	0
Otu04601	0	0	0	0	0	0	0	0	0	0	0	0	0	0	0	0	0	0	0	0	0	0	0.0844595	0	0	0	0	0	0	0	0	0	0	0	0	0	0	0	0	0	0	0	0	0	0	0	0	0	0
Otu04602	0	0	0	0	0	0	0	0	0	0	0	0	0	0	0	0	0	0	0	0	0	0	0.0844595	0	0	0	0	0	0	0	0	0	0	0	0	0	0	0	0	0	0	0	0	0	0	0	0	0	0
Otu04603	0	0	0	0	0	0	0	0	0	0	0	0	0	0	0	0	0	0	0	0	0	0	0.0844595	0	0	0	0	0	0	0	0	0	0	0	0	0	0	0	0	0	0	0	0	0	0	0	0	0	0
Otu04608	0	0	0	0	0	0	0	0	0	0	0	0	0	0	0	0	0	0	0	0	0	0	0.0844595	0	0	0	0	0	0	0	0	0	0	0	0	0	0	0	0	0	0	0	0	0	0	0	0	0	0
Otu04613	0	0	0	0	0	0	0	0	0	0	0	0	0	0	0	0	0	0	0	0	0	0	0.0844595	0	0	0	0	0	0	0	0	0	0	0	0	0	0	0	0	0	0	0	0	0	0	0	0	0	0
Otu04647	0	0	0	0	0	0	0	0	0	0	0	0	0	0	0	0	0	0	0	0	0	0	0.0844595	0	0	0	0	0	0	0	0	0	0	0	0	0	0	0	0	0	0	0	0	0	0	0	0	0	0
Otu04672	0	0	0	0	0	0	0	0	0	0	0	0	0	0	0	0	0	0	0	0	0	0	0.0844595	0	0	0	0	0	0	0	0	0	0	0	0	0	0	0	0	0	0	0	0	0	0	0	0	0	0
Otu04684	0	0	0	0	0	0	0	0	0	0	0	0	0	0	0	0	0	0	0	0	0	0	0	0	0	0	0	0	0	0	0	0	0	0	0	0	0	0	0	0	0	0	0	0	0	0	0	0	0
Otu05046	0	0	0	0	0	0	0	0	0	0	0	0	0	0	0	0	0	0	0	0	0	0	0	0	0	0	0	0	0	0	0	0	0	0	0	0	0.0844595	0	0	0	0	0	0	0	0	0	0	0	0
Otu05091	0	0	0	0	0	0	0	0	0	0	0	0	0	0	0	0	0	0	0	0	0	0	0	0	0	0	0	0	0.0844595	0	0	0	0	0	0	0	0	0	0	0	0	0	0	0	0	0	0	0	0
Otu05233	0	0	0	0	0	0	0	0	0	0	0	0	0	0	0	0	0	0	0	0	0	0	0	0	0	0	0	0	0.0844595	0	0	0	0	0	0	0	0	0	0	0	0	0	0	0	0	0	0	0	0
Otu06462	0	0	0	0	0	0	0	0	0	0	0	0	0	0	0	0	0	0	0	0	0	0	0	0	0	0	0	0	0	0	0	0	0	0	0	0	0.0844595	0	0	0	0	0	0	0	0	0	0	0	0
Otu06468	0	0	0	0	0	0	0	0	0	0	0	0	0	0	0	0	0	0	0	0	0	0	0	0	0	0	0	0	0	0	0	0	0	0	0	0	0.0844595	0	0	0	0	0	0	0	0	0	0	0	0
Otu06499	0	0	0	0	0	0	0	0	0	0	0	0	0	0	0	0	0	0	0	0	0	0	0	0	0	0	0	0	0	0	0	0	0	0	0	0	0.0844595	0	0	0	0	0	0	0	0	0	0	0	0
Otu06500	0	0	0	0	0	0	0	0	0	0	0	0	0	0	0	0	0	0	0	0	0	0	0	0	0	0	0	0	0	0	0	0	0	0	0	0	0.0844595	0	0	0	0	0	0	0	0	0	0	0	0
Otu06562	0	0	0	0	0	0	0	0	0	0	0	0.0844595	0	0	0	0	0	0	0	0	0	0	0	0	0	0	0	0	0	0	0	0	0	0	0	0	0	0	0	0	0	0	0	0	0	0	0	0	0
Otu06622	0	0	0	0	0	0	0	0	0	0	0	0.0844595	0	0	0	0	0	0	0	0	0	0	0	0	0	0	0	0	0	0	0	0	0	0	0	0	0	0	0	0	0	0	0	0	0	0	0	0	0
Otu06857	0	0	0	0	0	0	0	0	0	0	0	0	0	0	0	0.0844595	0	0	0	0	0	0	0	0	0	0	0	0	0	0	0	0	0	0	0	0	0	0	0	0	0	0	0	0	0	0	0	0	0
Otu06877	0	0	0	0	0	0	0	0	0	0	0	0	0	0	0	0.0844595	0	0	0	0	0	0	0	0	0	0	0	0	0	0	0	0	0	0	0	0	0	0	0	0	0	0	0	0	0	0	0	0	0
Otu06882	0	0	0	0	0	0	0	0	0	0	0	0	0	0	0	0.0844595	0	0	0	0	0	0	0	0	0	0	0	0	0	0	0	0	0	0	0	0	0	0	0	0	0	0	0	0	0	0	0	0	0
Otu06906	0	0	0	0	0	0	0	0	0	0	0	0	0	0	0	0.0844595	0	0	0	0	0	0	0	0	0	0	0	0	0	0	0	0	0	0	0	0	0	0	0	0	0	0	0	0	0	0	0	0	0
Otu06922	0	0	0	0	0	0	0	0	0	0	0	0	0	0	0	0.0844595	0	0	0	0	0	0	0	0	0	0	0	0	0	0	0	0	0	0	0	0	0	0	0	0	0	0	0	0	0	0	0	0	0
Otu06951	0	0	0	0	0	0	0	0	0	0	0	0	0	0	0	0.0844595	0	0	0	0	0	0	0	0	0	0	0	0	0	0	0	0	0	0	0	0	0	0	0	0	0	0	0	0	0	0	0	0	0
Otu06955	0	0	0	0	0	0	0	0	0	0	0	0	0	0	0	0.0844595	0	0	0	0	0	0	0	0	0	0	0	0	0	0	0	0	0	0	0	0	0	0	0	0	0	0	0	0	0	0	0	0	0
Otu06982	0	0	0	0	0	0	0	0	0	0	0	0	0	0	0	0.0844595	0	0	0	0	0	0	0	0	0	0	0	0	0	0	0	0	0	0	0	0	0	0	0	0	0	0	0	0	0	0	0	0	0
Otu06997	0	0	0	0	0	0	0	0	0	0	0	0	0	0	0	0.0844595	0	0	0	0	0	0	0	0	0	0	0	0	0	0	0	0	0	0	0	0	0	0	0	0	0	0	0	0	0	0	0	0	0
Otu06998	0	0	0	0	0	0	0	0	0	0	0	0	0	0	0	0.0844595	0	0	0	0	0	0	0	0	0	0	0	0	0	0	0	0	0	0	0	0	0	0	0	0	0	0	0	0	0	0	0	0	0
Otu08867	0	0	0	0	0	0	0	0	0	0	0	0	0	0	0	0	0	0	0	0	0	0	0	0	0	0	0	0	0	0	0	0	0	0	0	0	0	0	0	0	0	0	0	0	0	0	0	0	0
Otu08908	0	0	0	0	0	0	0	0	0	0	0	0	0	0	0	0	0	0	0	0	0	0	0	0	0	0	0	0	0	0	0	0	0	0	0	0	0	0	0	0	0	0	0	0	0	0	0	0	0
Otu08909	0	0	0	0	0	0	0	0	0	0	0	0	0	0	0	0	0	0	0	0	0	0	0	0	0	0	0	0	0	0	0	0	0	0	0	0	0	0	0	0	0	0	0	0	0	0	0	0	0
Otu09690	0	0	0	0	0	0	0	0	0	0	0	0	0	0	0	0	0	0	0	0	0	0	0	0	0	0	0	0	0	0	0	0	0	0	0	0	0	0	0	0	0	0	0	0	0	0	0	0	0
Otu06719	0	0	0	0	0	0	0	0	0	0	0	0	0.0844595	0	0	0	0	0	0	0	0	0	0	0	0	0	0	0	0	0	0	0	0	0	0	0	0	0	0	0	0	0	0	0	0	0	0	0	0
Otu06968	0	0	0	0	0	0	0	0	0	0	0	0	0	0	0	0.0844595	0	0	0	0	0	0	0	0	0	0	0	0	0	0	0	0	0	0	0	0	0	0	0	0	0	0	0	0	0	0	0	0	0
Otu01445	0	0	0	0.253378	0	0	0	0	0	0	0	0	0	0	0	0	0	0	0	0	0	0	0	0	0	0	0	0	0	0	0	0	0	0	0	0	0	0	0	0	0	0	0	0	0	0	0	0	0
Otu01392	0	0	0	0.253378	0	0	0	0	0	0	0	0	0	0	0	0	0	0	0	0	0	0	0	0	0	0	0	0	0	0	0	0	0	0	0	0	0	0	0	0	0	0	0	0	0	0	0	0	0
Otu03924	0	0	0	0	0	0	0	0	0	0	0	0	0	0	0	0	0	0	0	0	0	0	0	0	0	0	0	0	0	0	0	0	0	0	0	0	0.0844595	0	0	0	0	0	0	0	0	0	0	0	0
Otu03659	0	0	0	0	0	0	0	0	0	0	0	0	0	0	0	0	0	0.0844595	0	0	0	0	0.0844595	0	0	0	0	0	0	0	0	0	0	0	0	0	0	0	0	0	0	0	0	0	0	0	0	0	0
Otu05910	0	0	0	0	0	0	0	0	0	0	0	0	0	0	0	0	0	0	0	0	0	0	0	0	0	0	0	0	0	0	0	0	0	0.0844595	0	0	0	0	0	0	0	0	0	0	0	0	0	0	0
Otu00111	0	0	0	0	0	0	0	0	0	0	0	0	0.168919	0	0	0	0	0	0	0	0	0	0	0	0	0	0	0	0	0	0	0	0	0	0	0	0	0	0	0	0	0	0	0	0	0	0	0	0
Otu04359	0	0	0	0	0	0	0	0	0	0	0	0	0	0	0	0	0	0	0.0844595	0	0	0	0	0	0	0	0	0	0	0	0	0	0	0	0	0	0	0	0	0	0	0	0	0	0	0	0	0	0
Otu04176	0	0	0	0	0	0	0	0	0	0	0	0	0	0	0	0	0	0	0.253378	0	0	0	0	0	0	0	0	0	0	0	0	0	0	0	0	0	0	0	0	0	0	0	0	0	0	0	0	0	0
Otu01780	0	0	0	0	0	0	0	0	0	0	0	0	0	0	0	0.0844595	0	0	0	0	0	0	0	0	0	0	0	0	0	0	0	0	0	0	0	0	0	0	0	0	0	0	0	0	0	0	0	0	0
Otu03820	0	0	0	0	0	0	0	0	0	0	0	0	0	0	0	0	0	0.0844595	0	0	0	0	0	0	0	0	0	0	0	0	0	0	0	0	0	0	0	0	0	0	0	0	0	0	0	0	0	0	0
Otu00529	0	0	0	0.337838	0	0	0	0.0844595	0	0	0	0	0	0	0	2.78716	0	0	0	0	0	0	0	0	0	0	0	0	0.0844595	0	0	0	0	0	0	0	0	0	0	0	0	0	0	0	0	0	0	0	0
Otu01996	0	0	0	0	0.168919	0	0	0	0	0	0	0	0	0	0	0	0	0	0	0	0	0	0	0	0	0	0	0	0	0	0	0	0	0	0	0	0	0	0	0	0	0	0	0	0	0	0	0	0
Otu06692	0	0	0	0	0	0	0	0	0	0	0	0	0	0	0	0.168919	0	0	0	0	0	0	0	0	0	0	0	0	0	0	0	0	0	0	0	0	0	0	0	0	0	0	0	0	0	0	0	0	0
Otu01500	0	0	0	0	0	0	0	0	0	0	0	0	0	0	0	0.0844595	0	0	0	0	0	0	0	0	0	0	0	0	0	0	0	0	0	0	0	0	0	0	0	0	0	0	0	0	0	0	0	0	0
Otu03609	0	0	0	0	0	0	0	0	0	0	0	0	0	0	0	0	0	0.0844595	0	0	0	0	0	0	0	0	0	0	0	0	0	0	0	0	0	0	0	0	0	0	0	0	0	0	0	0	0	0	0
Otu00386	0.0844595	0	0	0	0	0	0	0	0	0	0	0	0	0	0	0	0	0	0	0	0	0	0	0	0	0	0	0	0	0	0	0	0	0	0	0	0	0	0	0	0	0	0	0	0	0	0	0	0
Otu03666	0	0	0	0	0	0	0	0	0	0	0	0	0	0	0	0	0	0.0844595	0	0	0	0	0	0	0	0	0	0	0	0	0	0	0	0	0	0	0	0	0	0	0	0	0	0	0	0	0	0	0
Otu07337	0	0	0	0	0	0	0	0	0	0	0	0	0	0	0	0	0	0	0	0	0	0	0	0	0	0	0	0	0	0	0	0	0	0	0	0	0	0	0.168919	0.506757	0.168919	0	0	0	0.0844595	0	0	0	0
Otu01413	0	0	0	0.0844595	0	0	0	0	0	0	0	0	0	0	0	0	0	0	0	0	0	0	0	0	0	0	0	0	0	0	0	0	0	0	0	0	0	0	0	0	0	0	0	0	0	0	0	0	0
Otu03861	0	0	0	0	0	0	0	0	0	0	0	0	0	0	0	0	0	0	0	0	0	0	0.0844595	0	0	0	0	0	0	0	0	0	0	0	0	0	0	0	0	0	0	0	0	0	0	0	0	0	0
Otu01968	0	0	0	0	0.0844595	0	0	0	0	0	0	0	0	0	0	0	0	0	0	0	0	0	0	0	0	0	0	0	0	0	0	0	0	0	0	0	0	0	0	0	0	0	0	0	0	0	0	0	0
Otu04675	0	0	0	0	0	0	0	0	0	0	0	0	0	0	0	0	0	0	0	0	0	0	0.0844595	0	0	0	0	0	0	0	0	0	0	0	0	0	0	0	0	0	0	0	0	0	0	0	0	0	0
Otu01559	0	0	0	0	0	0	0	0	0	0	0	0	0	0	0	0	0	0	0	0	0	0	0	0	0	0	0	0	0	0	0	0	0	0	0	0	0.0844595	0	0	0	0	0	0	0	0	0	0	0	0
Otu01699	0	0	0	0.0844595	0	0	0	0	0	0	0	0	0	0	0	0	0	0	0	0	0	0	0	0	0	0	0	0	0	0	0	0	0	0	0	0	0	0	0	0	0	0	0	0	0	0	0	0	0
Otu03472	0	0	0	0	0	0	0	0	0	0	0	0	0	0	0	0	0.0844595	0	0	0	0	0	0	0	0	0	0	0	0	0	0	0	0	0	0	0	0	0	0	0	0	0	0	0	0	0	0	0	0
Otu03724	0	0	0	0	0	0	0	0	0	0	0	0	0	0	0	0	0	0	0	0	0	0	0.0844595	0	0	0	0	0	0	0	0	0	0	0	0	0	0	0	0	0	0	0	0	0	0	0	0	0	0
Otu06651	0	0	0	0	0	0	0	0	0	0	0	0.0844595	0	0	0	0	0	0	0	0	0	0	0	0	0	0	0	0	0	0	0	0	0	0	0	0	0	0	0	0	0	0	0	0	0	0	0	0	0
Otu01928	0	0	0	0	0.0844595	0	0	0	0	0	0	0	0	0	0	0	0	0	0	0	0	0	0	0	0	0	0	0	0	0	0	0	0	0	0	0	0	0	0	0	0	0	0	0	0	0	0	0	0
Otu01391	0	0	0	0.337838	0	0	0	0	0	0	0	0	0	0	0	0	0	0	0	0	0	0	0	0	0	0	0	0	0	0	0	0	0	0	0	0	0	0	0	0	0	0	0	0	0	0	0	0	0
Otu01969	0	0	0	0	0.253378	0	0	0	0	0	0	0	0	0	0	0	0	0	0	0	0	0	0	0	0	0	0	0	0	0	0	0	0	0	0	0	0	0	0	0	0	0	0	0	0	0	0	0	0
Otu03694	0	0	0	0	0	0	0	0	0	0	0	0	0	0	0	0	0	0.168919	0	0	0	0	0	0	0	0	0	0	0	0	0	0	0	0	0	0	0	0	0	0	0	0	0	0	0	0	0	0	0
Otu01816	0	0	0	0.0844595	0	0	0	0	0	0	0	0	0	0	0	0	0	0	0	0	0	0	0	0	0	0	0	0	0	0	0	0	0	0	0	0	0	0	0	0	0	0	0	0	0	0	0	0	0
Otu03809	0	0	0	0	0	0	0	0	0	0	0	0	0	0	0	0	0	0.0844595	0	0	0	0	0	0	0	0	0	0	0	0	0	0	0	0	0	0	0	0	0	0	0	0	0	0	0	0	0	0	0
Otu03984	0	0	0	0	0	0	0	0	0	0	0	0	0	0	0	0	0	0.0844595	0	0	0	0	0	0	0	0	0	0	0	0	0	0	0	0	0	0	0	0	0	0	0	0	0	0	0	0	0	0	0
Otu06356	0	0	0	0	0	0	0	0	0	0	0	0	0	0	0	0	0	0	0	0	0	0	0	0	0	0	0	0	0	0	0	0	0	0	0	0	0.0844595	0	0	0	0	0	0	0	0	0	0	0	0
Otu00083	0.0844595	0	0	0.168919	0.0844595	0	0	0	0	0	0	0.0844595	0	0	0	0.0844595	0	0	0	0	0	0	0	0	0	0	0	0	0	0	0	0	0	0	0	0	0	0	0	0	0	0	0	0	0	0	0	0	0
Otu01354	0	0	0	0	0	0	0	0	0	0	0	0.337838	0	0	0	0	0	0	0	0	0	0	0	0	0	0	0	0	0	0	0	0	0	0	0.0844595	0	0	0	0	0	0	0	0	0	0	0	0	0	0
Otu00966	0	0	0	0.168919	0	0	0	0.0844595	0	0	0	0	0	0	0	0	0	0	0	0	0	0	0	0	0	0	0	0	0	0	0	0	0	0	0	0	0	0	0	0	0	0	0	0	0	0	0	0	0
Otu04625	0	0	0	0	0	0	0	0	0	0	0	0.168919	0	0	0	0	0	0	0	0	0	0	0.0844595	0	0	0	0	0	0	0	0	0	0	0	0	0	0	0	0	0	0	0	0	0	0	0	0	0	0
Otu01548	0	0	0	0	0	0	0	0	0	0	0	0	0.0844595	0	0	0	0	0	0	0	0	0	0	0	0	0	0	0	0	0	0	0	0	0	0	0	0	0	0	0	0	0	0	0	0	0	0	0	0
Otu03829	0	0	0	0	0	0	0	0	0	0	0	0	0	0	0	0	0	0.0844595	0	0	0	0	0	0	0	0	0	0	0	0	0	0	0	0	0	0	0	0	0	0	0	0	0	0	0	0	0	0	0
Otu04364	0	0	0	0	0	0	0	0	0	0	0	0	0	0	0	0	0	0	0.0844595	0	0	0	0	0	0	0	0	0	0	0	0	0	0	0	0	0	0	0	0	0	0	0	0	0	0	0	0	0	0
Otu06569	0	0	0	0	0	0	0	0	0	0	0	0.0844595	0	0	0	0	0	0	0	0	0	0	0	0	0	0	0	0	0	0	0	0	0	0	0	0	0	0	0	0	0	0	0	0	0	0	0	0	0
Otu08887	0	0	0	0	0	0	0	0	0	0	0	0	0	0	0	0	0	0	0	0	0	0	0	0	0	0	0	0	0	0	0	0	0	0	0	0	0	0	0	0	0	0	0	0	0	0	0	0	0
Otu01200	0	0.168919	0	0.506757	0	0	0	0	0	0	0	0	0	0	0	0	0	0	0	0	0	0	0	0	0	0	0	0	0	0	0	0	0	0	0	0	0	0	0	0	0	0	0	0	0	0	0	0	0
Otu00542	0	0	0	0	0	0	0	0.253378	0	0	0	0.168919	0	0	0	0	0	0	0	0	0	0	0	0	0	0	0	0	0	0	0	0	0	0	0	0	0	0	0	0	0	0	0	0	0	0	0	0	0
Otu02206	0	0	0	0	0.0844595	0	0	0	0	0	0	0.0844595	0	0	0	0	0	0	0	0	0	0	0	0	0	0	0	0	0	0	0	0	0	0	0	0	0	0	0	0	0	0	0	0	0	0	0	0	0
Otu03789	0	0	0	0	0	0	0	0	0	0	0	0	0	0	0	0	0	0.0844595	0	0	0	0	0	0	0	0	0	0	0	0	0	0	0	0	0	0	0	0	0	0	0	0	0	0	0	0	0	0	0
Otu05141	0	0	0	0	0	0	0	0	0	0	0	0	0	0	0	0.168919	0	0	0	0	0	0	0	0	0	0	0	0	0	0	0	0	0	0	0	0	0	0	0	0	0	0	0	0	0	0	0	0	0
Otu01031	0	0	0	0	0	0	0	0	0	0	0	0	0	0	0	0.168919	0	0	0	0	0	0	0	0	0	0	0	0	0	0	0	0	0	0	0	0	0	0	0	0	0	0	0	0	0	0	0	0	0
Otu01342	0	0	0.0844595	0	0	0	0	0	0	0	0	0	0	0	0	0	0	0	0	0	0	0	0	0	0	0	0	0	0	0	0	0	0	0	0	0	0	0	0	0	0	0	0	0	0	0	0	0	0
Otu01476	0	0	0	0	0.0844595	0	0	0	0	0	0	0	0	0	0	0	0	0	0	0	0	0	0	0	0	0	0	0	0	0	0	0	0	0	0	0	0	0	0	0	0	0	0	0	0	0	0	0	0
Otu02006	0	0	0	0	0.0844595	0	0	0	0	0	0	0	0	0	0	0	0	0	0	0	0	0	0	0	0	0	0	0	0	0	0	0	0	0	0	0	0	0	0	0	0	0	0	0	0	0	0	0	0
Otu03363	0	0	0	0	0	0	0	0	0	0	0	0	0	0	0	0	0.0844595	0	0	0	0	0	0	0	0	0	0	0	0	0	0	0	0	0	0	0	0	0	0	0	0	0	0	0	0	0	0	0	0
Otu03665	0	0	0	0	0	0	0	0	0	0	0	0	0	0	0	0	0	0.0844595	0	0	0	0	0	0	0	0	0	0	0	0	0	0	0	0	0	0	0	0	0	0	0	0	0	0	0	0	0	0	0
Otu03878	0	0	0	0	0	0	0	0	0	0	0	0	0	0	0	0	0	0	0	0	0	0	0.0844595	0	0	0	0	0	0	0	0	0	0	0	0	0	0	0	0	0	0	0	0	0	0	0	0	0	0
Otu06814	0	0	0	0	0	0	0	0	0	0	0	0	0	0.0844595	0	0	0	0	0	0	0	0	0	0	0	0	0	0	0	0	0	0	0	0	0	0	0	0	0	0	0	0	0	0	0	0	0	0	0
Otu00157	0.0844595	0	0	2.53378	0	0	0	0.168919	0	0	0	0	0	0	0	0	0	0	0	0	0	0	0	0	0	0	0	0	0	0	0	0	0	0	0	0	0	0	0	0	0	0	0	0	0	0	0	0	0
Otu03619	0	0	0	0	0	0	0	0	0	0	0	0	0	0	0	0	0	0	0	0	0	0	0.422297	0	0	0	0	0	0.168919	0	0	0	0	0	0	0	0	0	0	0	0	0	0	0	0	0	0	0	0
Otu01380	0	0	0	0.253378	0	0	0	0	0	0	0	0	0	0	0	0	0	0	0	0	0	0	0	0	0	0	0	0	0	0	0	0	0	0	0	0	0	0	0	0	0	0	0	0	0	0	0	0	0
Otu02062	0	0	0	0	0.0844595	0	0	0	0	0	0	0	0	0	0	0.168919	0	0	0	0	0	0	0	0	0	0	0	0	0	0	0	0	0	0	0	0	0	0	0	0	0	0	0	0	0	0	0	0	0
Otu01389	0	0	0	0.0844595	0	0	0	0	0	0	0	0.0844595	0	0	0	0	0	0	0	0	0	0	0	0	0	0	0	0	0	0	0	0	0	0	0	0	0	0	0	0	0	0	0	0	0	0	0	0	0
Otu01949	0	0	0	0	0.168919	0	0	0	0	0	0	0	0	0	0	0	0	0	0	0	0	0	0	0	0	0	0	0	0	0	0	0	0	0	0	0	0	0	0	0	0	0	0	0	0	0	0	0	0
Otu04206	0	0	0	0	0	0	0	0	0	0	0	0	0	0	0	0	0	0	0.168919	0	0	0	0	0	0	0	0	0	0	0	0	0	0	0	0	0	0	0	0	0	0	0	0	0	0	0	0	0	0
Otu06550	0	0	0	0	0	0	0	0	0	0	0	0.168919	0	0	0	0	0	0	0	0	0	0	0	0	0	0	0	0	0	0	0	0	0	0	0	0	0	0	0	0	0	0	0	0	0	0	0	0	0
Otu06548	0	0	0	0	0	0	0	0	0	0	0	0.168919	0	0	0	0	0	0	0	0	0	0	0	0	0	0	0	0	0	0	0	0	0	0	0	0	0	0	0	0	0	0	0	0	0	0	0	0	0
Otu00190	0	0	0	0.0844595	0	0	0	0	0	0	0	0	0	0	0	0	0	0	0	0	0	0	0	0	0	0	0	0	0	0	0	0	0	0	0	0	0	0	0	0	0	0	0	0	0	0	0	0	0
Otu00941	0	0	0	0	0	0	0	0	0	0	0	0	0	0	0	0	0	0	0	0	0	0	0.0844595	0	0	0	0	0	0	0	0	0	0	0	0	0	0	0	0	0	0	0	0	0	0	0	0	0	0
Otu02063	0	0	0	0	0.0844595	0	0	0	0	0	0	0	0	0	0	0	0	0	0	0	0	0	0	0	0	0	0	0	0	0	0	0	0	0	0	0	0	0	0	0	0	0	0	0	0	0	0	0	0
Otu02090	0	0	0	0	0.0844595	0	0	0	0	0	0	0	0	0	0	0	0	0	0	0	0	0	0	0	0	0	0	0	0	0	0	0	0	0	0	0	0	0	0	0	0	0	0	0	0	0	0	0	0
Otu02216	0	0	0	0	0.0844595	0	0	0	0	0	0	0	0	0	0	0	0	0	0	0	0	0	0	0	0	0	0	0	0	0	0	0	0	0	0	0	0	0	0	0	0	0	0	0	0	0	0	0	0
Otu03574	0	0	0	0	0	0	0	0	0	0	0	0	0	0	0	0	0	0	0	0	0	0	0	0	0	0	0	0	0.0844595	0	0	0	0	0	0	0	0	0	0	0	0	0	0	0	0	0	0	0	0
Otu04670	0	0	0	0	0	0	0	0	0	0	0	0	0	0	0	0	0	0	0	0	0	0	0.0844595	0	0	0	0	0	0	0	0	0	0	0	0	0	0	0	0	0	0	0	0	0	0	0	0	0	0
Otu05103	0	0	0	0	0	0	0	0	0	0	0	0.0844595	0	0	0	0	0	0	0	0	0	0	0	0	0	0	0	0	0	0	0	0	0	0	0	0	0	0	0	0	0	0	0	0	0	0	0	0	0
Otu00062	0.168919	0	0	0	0	0	0	0	0	0	0	0	0	0	0	0	0.168919	1.85811	0	0	0	0	1.43581	0	0	0	0	0	0.168919	0	0	0	0	0	0	0	0.506757	0	0	0	0	0	0	0	0	0	0	0	0
Otu00409	0	0	0	0.0844595	0	0.0844595	0	0.0844595	0	0	0	0.337838	0	0	0.0844595	0.168919	0.0844595	0	0	0	0	0	0	0	0	0	0	0.0844595	0	0	0	0	0	0	0	0.0844595	0	0	0	0	0	0	0	0	0	0	0	0	0
Otu01252	0	0	0	0	0.168919	0	0	0	0	0	0.0844595	0.168919	0	0	0	0	0	0	0.253378	0	0	0	0	0	0	0	0	0	0	0	0	0	0	0	0	0.0844595	0	0	0	0	0	0	0	0	0	0	0	0	0
Otu00825	0	0	0	0	0	0	0	0.0844595	0	0	0	0	0.0844595	0	0	0	0.0844595	0	0	0	0.0844595	0	0	0	0	0	0	0	0	0.0844595	0	0	0	0	0	0	0.0844595	0	0	0	0	0	0	0	0	0	0	0	0
Otu02889	0	0	0	0	0	0	0	0	0	0	0	0	0	0	0	0	0	0	0.168919	0	0	0	0	0	0	0.0844595	0	0	0	0	0	0	0	0	0	0	0	0	0	0	0.168919	0	0	0	0	0	0	0	0
Otu00538	0	0	0	0	0	0	0	0.0844595	0	0	0	0	0.0844595	0	0	0.0844595	0	0	0	0	0	0	0	0	0	0	0	0	0	0	0	0	0	0	0	0	0	0	0	0.0844595	0	0	0.0844595	0	0	0	0	0	0
Otu02452	0	0	0	0	0	0	0	0	0	0	0	0	0	0	0	0	0	0	0	0	0	0	0	0	0	0	0.168919	0	0	0	0	0	0	0	0	0	0	0	0	0	0	0	0	0	0	0	0	0	0
Otu04082	0	0	0	0	0	0	0	0	0	0	0	0	0	0	0	0	0	0	0	0	0	0	0	0	0	0	0	0	0	0	0	0.0844595	0	0	0	0	0	0	0	0	0	0	0	0	0	0	0	0	0
Otu04184	0	0	0	0	0	0	0	0	0	0	0	0	0	0	0	0	0	0	0.168919	0	0	0	0	0	0	0	0	0	0	0	0	0	0	0	0	0	0	0	0	0	0	0	0	0	0	0	0	0	0
Otu00562	0	0	0	0	0	0	0	0.0844595	0	0	0	0	0	0	0	0	0	0	0	0	0	0	0	0	0	0	0	0	0	0	0	0	0	0	0	0	0	0	0	0	0	0	0	0	0	0	0	0	0
Otu05418	0	0	0	0	0	0	0	0	0	0	0	0	0	0	0	0	0	0	0	0	0	0	0	0	0	0	0	0	0	0.0844595	0	0	0	0	0	0	0	0	0	0	0	0	0	0	0	0	0	0	0
Otu09711	0	0	0	0	0	0	0	0	0	0	0	0	0	0	0	0	0	0	0	0	0	0	0	0	0	0	0	0	0	0	0	0	0	0	0	0	0	0	0	0	0	0	0	0	0	0	0	0	0
Otu02149	0	0	0	0	0	0.0844595	0	0	0	0	0	0.337838	0	0.337838	0	0.0844595	1.18243	9.45946	0.168919	0.0844595	0	0	12.9223	0.0844595	0	0	0	0	0.253378	0	0	0	0	0	0.253378	0.0844595	1.09797	0	0	0	0	0	0	0	0	0	0	0	0
Otu00837	0	0	0	0	0	0	0	0	0	0	0	0	0	0	0	0	0.168919	2.02703	0.0844595	0	0	0	5.99662	0	0	0	0	0	0.253378	0	0.0844595	0	0	0	0.168919	0	0.253378	0	0	0	0	0	0	0	0	0	0	0	0
Otu00582	0	0	0	0.168919	0.0844595	0.0844595	0	0.168919	0	0	0	0.253378	0	0	0	1.26689	0	0.0844595	0	0	0	0	0.168919	0	0	0	0	0	0.0844595	0	0	0	0	0.0844595	0	0	0	0	0	0	0	0	0	0	0	0	0	0	0
Otu00210	0.0844595	0	0.0844595	0.168919	0.168919	0.0844595	0	0	0	0	0	0.253378	0	0.0844595	0	0.422297	0	0	0	0	0	0	0	0	0	0	0	0	0	0	0	0	0	0	0.0844595	0	0	0	0	0	0	0	0	0	0	0	0	0	0
Otu00401	0	0	0	0	0	0	0	0.337838	0	0	0	0	0	0	0	0.760135	0	0	0	0	0	0	0	0	0	0	0	0	0.0844595	0	0	0	0	0	0	0	0	0	0	0	0	0	0	0	0	0	0	0	0
Otu03561	0	0	0	0	0	0	0	0	0	0	0	0	0	0	0	0	0	0.591216	0	0	0	0	0.591216	0	0	0	0	0	0	0	0	0	0	0	0	0	0	0	0	0	0	0	0	0	0	0	0	0	0
Otu00521	0	0	0	0	0	0	0	0.168919	0	0	0	0	0	0	0	0	0	0.337838	0.168919	0	0	0	0.0844595	0	0	0	0	0	0	0	0	0	0	0	0	0	0	0	0	0	0	0	0	0	0	0	0	0	0
Otu05757	0	0	0	0	0	0	0	0	0	0	0	0	0	0	0	0	0	0	0	0	0	0	0	0	0	0	0	0	0	0	0	0	0	0	0	0	0	0	0	0.0844595	0	0	0	0	0	0	0	0	0
Otu05429	0	0	0	0	0	0	0	0	0	0	0	0	0	0	0	0	0	0	0	0	0	0	0	0	0	0	0	0	0	0	0.0844595	0.0844595	0	0	0	0	0	0	0	0	0	0	0	0	0	0	0	0	0
Otu03568	0	0	0	0	0	0	0	0	0	0	0	0	0	0.0844595	0	0	0	0.168919	0	0	0	0	0.422297	0	0	0	0	0	0	0	0	0	0	0	0	0	0	0	0	0	0	0	0	0	0	0	0	0	0
Otu01444	0	0	0	0.0844595	0	0	0	0	0	0	0	0.168919	0.168919	0	0	0.168919	0	0	0	0	0	0	0	0	0	0	0	0	0	0	0	0	0	0	0	0	0	0	0	0	0	0	0	0	0	0	0	0	0
Otu00318	0.168919	0	0	0.168919	0.0844595	0	0	0	0	0	0	0	0	0	0	0	0	0	0	0	0	0	0	0	0	0	0	0	0	0	0	0	0	0	0	0	0	0	0	0	0	0	0	0	0	0	0	0	0
Otu00335	0.0844595	0	0	0	0.168919	0.0844595	0	0	0	0	0	0	0	0	0	0	0	0	0	0	0	0	0	0	0	0	0	0	0	0	0	0	0	0	0	0	0	0	0	0	0	0	0	0	0	0	0	0	0
Otu01368	0	0	0	0	0	0	0	0	0	0	0	0	0	0.0844595	0	0	0	0	0	0	0	0.0844595	0	0	0	0	0	0	0	0	0	0	0	0	0	0	0	0	0	0	0	0	0.0844595	0	0	0	0	0	0
Otu01626	0	0	0	0.168919	0.0844595	0	0	0	0	0	0	0	0.0844595	0	0	0	0	0	0	0	0	0	0	0	0	0	0	0	0	0	0	0	0	0	0	0	0	0	0	0	0	0	0	0	0	0	0	0	0
Otu01980	0	0	0	0	0.0844595	0	0	0	0	0	0.0844595	0	0	0	0	0.0844595	0	0	0	0	0	0	0	0	0	0	0	0	0	0	0	0	0	0	0	0	0	0	0	0	0	0	0	0	0	0	0	0	0
Otu02547	0	0	0	0	0	0	0	0	0	0	0	0	0	0	0	0.168919	0	0	0	0	0	0	0	0	0	0	0	0	0.0844595	0	0	0	0	0	0	0	0	0	0	0	0	0	0	0	0	0	0	0	0
Otu03567	0	0	0	0	0	0	0	0	0	0	0	0	0	0	0	0	0	0.253378	0	0	0	0	0	0	0	0	0	0	0	0	0	0	0	0	0	0	0	0	0	0	0	0	0	0	0	0	0	0	0
Otu05043	0	0	0	0	0	0	0	0	0	0	0	0	0.0844595	0	0	0	0	0	0	0	0	0	0	0	0	0	0	0	0.168919	0	0	0	0	0	0	0	0	0	0	0	0	0	0	0	0	0	0	0	0
Otu00202	0.168919	0	0	0	0	0	0	0	0	0	0	0	0	0	0	0	0	0	0	0	0	0	0	0	0	0	0	0	0	0	0	0	0	0	0	0	0	0	0	0	0	0	0	0	0	0	0	0	0
Otu00336	0	0	0	0	0.0844595	0	0	0	0	0	0	0	0	0	0	0	0	0.0844595	0	0	0	0	0	0	0	0	0	0	0	0	0	0	0	0	0	0	0	0	0	0	0	0	0	0	0	0	0	0	0
Otu00517	0	0	0	0	0	0.0844595	0	0.0844595	0	0	0	0	0	0	0	0	0	0	0	0	0	0	0	0	0	0	0	0	0	0	0	0	0	0	0	0	0	0	0	0	0	0	0	0	0	0	0	0	0
Otu01412	0	0	0	0.168919	0	0	0	0	0	0	0	0	0	0	0	0	0	0	0	0	0	0	0	0	0	0	0	0	0	0	0	0	0	0	0	0	0	0	0	0	0	0	0	0	0	0	0	0	0
Otu01416	0	0	0	0.0844595	0	0	0	0	0	0	0	0.0844595	0	0	0	0	0	0	0	0	0	0	0	0	0	0	0	0	0	0	0	0	0	0	0	0	0	0	0	0	0	0	0	0	0	0	0	0	0
Otu01762	0	0	0	0.0844595	0	0	0	0	0	0	0	0	0	0	0	0	0	0	0	0	0	0	0.0844595	0	0	0	0	0	0	0	0	0	0	0	0	0	0	0	0	0	0	0	0	0	0	0	0	0	0
Otu01786	0	0	0	0	0.0844595	0	0	0	0	0	0	0	0	0	0	0	0	0.0844595	0	0	0	0	0	0	0	0	0	0	0	0	0	0	0	0	0	0	0	0	0	0	0	0	0	0	0	0	0	0	0
Otu03584	0	0	0	0	0	0	0	0	0	0	0	0	0	0	0	0	0	0.168919	0	0	0	0	0	0	0	0	0	0	0	0	0	0	0	0	0	0	0	0	0	0	0	0	0	0	0	0	0	0	0
Otu03618	0	0	0	0	0	0	0	0	0	0	0	0	0	0	0	0	0	0.168919	0	0	0	0	0	0	0	0	0	0	0	0	0	0	0	0	0	0	0	0	0	0	0	0	0	0	0	0	0	0	0
Otu06873	0	0	0	0	0	0	0	0	0	0	0	0	0	0	0	0.168919	0	0	0	0	0	0	0	0	0	0	0	0	0	0	0	0	0	0	0	0	0	0	0	0	0	0	0	0	0	0	0	0	0
Otu00333	0	0	0	0	0.0844595	0	0	0	0	0	0	0	0	0	0	0	0	0	0	0	0	0	0	0	0	0	0	0	0	0	0	0	0	0	0	0	0	0	0	0	0	0	0	0	0	0	0	0	0
Otu00705	0	0	0	0	0	0	0	0.0844595	0	0	0	0	0	0	0	0	0	0	0	0	0	0	0	0	0	0	0	0	0	0	0	0	0	0	0	0	0	0	0	0	0	0	0	0	0	0	0	0	0
Otu00975	0	0	0	0	0	0	0	0.0844595	0	0	0	0	0	0	0	0	0	0	0	0	0	0	0	0	0	0	0	0	0	0	0	0	0	0	0	0	0	0	0	0	0	0	0	0	0	0	0	0	0
Otu01261	0	0	0.0844595	0	0	0	0	0	0	0	0	0	0	0	0	0	0	0	0	0	0	0	0	0	0	0	0	0	0	0	0	0	0	0	0	0	0	0	0	0	0	0	0	0	0	0	0	0	0
Otu01447	0	0	0	0.0844595	0	0	0	0	0	0	0	0	0	0	0	0	0	0	0	0	0	0	0	0	0	0	0	0	0	0	0	0	0	0	0	0	0	0	0	0	0	0	0	0	0	0	0	0	0
Otu03361	0	0	0	0	0	0	0	0	0	0	0	0	0	0	0	0	0.0844595	0	0	0	0	0	0	0	0	0	0	0	0	0	0	0	0	0	0	0	0	0	0	0	0	0	0	0	0	0	0	0	0
Otu03399	0	0	0	0	0	0	0	0	0	0	0	0	0	0	0	0	0	0	0	0	0	0	0.0844595	0	0	0	0	0	0	0	0	0	0	0	0	0	0	0	0	0	0	0	0	0	0	0	0	0	0
Otu03457	0	0	0	0	0	0	0	0	0	0	0	0	0	0	0	0	0.0844595	0	0	0	0	0	0	0	0	0	0	0	0	0	0	0	0	0	0	0	0	0	0	0	0	0	0	0	0	0	0	0	0
Otu03580	0	0	0	0	0	0	0	0	0	0	0	0	0	0	0	0	0	0	0	0	0	0	0.0844595	0	0	0	0	0	0	0	0	0	0	0	0	0	0	0	0	0	0	0	0	0	0	0	0	0	0
Otu03706	0	0	0	0	0	0	0	0	0	0	0	0	0	0	0	0	0	0.0844595	0	0	0	0	0	0	0	0	0	0	0	0	0	0	0	0	0	0	0	0	0	0	0	0	0	0	0	0	0	0	0
Otu03743	0	0	0	0	0	0	0	0	0	0	0	0	0	0	0	0	0	0	0	0	0	0	0.0844595	0	0	0	0	0	0	0	0	0	0	0	0	0	0	0	0	0	0	0	0	0	0	0	0	0	0
Otu03760	0	0	0	0	0	0	0	0	0	0	0	0	0	0	0	0	0	0.0844595	0	0	0	0	0	0	0	0	0	0	0	0	0	0	0	0	0	0	0	0	0	0	0	0	0	0	0	0	0	0	0
Otu03821	0	0	0	0	0	0	0	0	0	0	0	0	0	0	0	0	0	0.0844595	0	0	0	0	0	0	0	0	0	0	0	0	0	0	0	0	0	0	0	0	0	0	0	0	0	0	0	0	0	0	0
Otu03842	0	0	0	0	0	0	0	0	0	0	0	0	0	0	0	0	0	0.0844595	0	0	0	0	0	0	0	0	0	0	0	0	0	0	0	0	0	0	0	0	0	0	0	0	0	0	0	0	0	0	0
Otu03962	0	0	0	0	0	0	0	0	0	0	0	0	0	0	0	0	0	0.0844595	0	0	0	0	0	0	0	0	0	0	0	0	0	0	0	0	0	0	0	0	0	0	0	0	0	0	0	0	0	0	0
Otu04621	0	0	0	0	0	0	0	0	0	0	0	0	0	0	0	0	0	0	0	0	0	0	0.0844595	0	0	0	0	0	0	0	0	0	0	0	0	0	0	0	0	0	0	0	0	0	0	0	0	0	0
Otu04673	0	0	0	0	0	0	0	0	0	0	0	0	0	0	0	0	0	0	0	0	0	0	0.0844595	0	0	0	0	0	0	0	0	0	0	0	0	0	0	0	0	0	0	0	0	0	0	0	0	0	0
Otu04849	0	0	0	0	0	0	0	0	0	0	0	0	0	0	0	0	0	0	0	0	0	0	0	0	0	0.0844595	0	0	0	0	0	0	0	0	0	0	0	0	0	0	0	0	0	0	0	0	0	0	0
Otu05930	0	0	0	0	0	0	0	0	0	0	0	0	0	0	0	0	0	0	0	0	0	0	0	0	0	0	0	0	0	0	0	0	0	0.0844595	0	0	0	0	0	0	0	0	0	0	0	0	0	0	0
Otu06067	0	0	0	0	0	0	0	0	0	0	0	0	0	0	0	0	0	0	0	0	0	0	0	0	0	0	0	0	0	0	0	0	0	0	0.0844595	0	0	0	0	0	0	0	0	0	0	0	0	0	0
Otu07075	0	0	0	0	0	0	0	0	0	0	0	0	0	0	0	0	0	0	0	0	0	0	0	0	0	0	0	0	0	0	0	0	0	0	0	0	0	0.0844595	0	0	0	0	0	0	0	0	0	0	0
Otu08851	0	0	0	0	0	0	0	0	0	0	0	0	0	0	0	0	0	0	0	0	0	0	0	0	0	0	0	0	0	0	0	0	0	0	0	0	0	0	0	0	0	0	0	0	0	0	0	0	0
Otu10327	0	0	0	0	0	0	0	0	0	0	0	0	0	0	0	0	0	0	0	0	0	0	0	0	0	0	0	0	0	0	0	0	0	0	0	0	0	0	0	0	0	0	0	0	0	0	0	0	0
Otu02929	0	0	0	0	0	0	0	0	0	0	0	0	0	0	0	0.0844595	0	0	0	0	0	0	0	0	0	0	0	0	0	0	0	0	0	0	0	0	0	0	0	0	0	0	0	0	0	0	0	0	0
Otu01621	0	0	0	0.0844595	0	0	0	0	0	0	0	0	0	0	0	0.168919	0.0844595	0	0	0	0	0	0	0	0	0	0	0	0	0	0	0	0	0	0	0	0	0	0	0	0	0	0	0	0	0	0	0	0
Otu01538	0	0	0	0.0844595	0	0	0	0	0	0	0	0	0	0	0	0	0	0	0	0	0	0	0	0	0	0	0	0	0	0	0	0	0	0	0	0	0	0	0	0	0	0	0	0	0	0	0	0	0
Otu05907	0	0	0	0	0	0	0	0	0	0	0	0	0	0	0	0	0	0	0	0	0	0	0	0	0	0	0	0	0	0	0	0	0	0	0	0	0	0	0	0	0	0	0	0	0	0	0	0	0
Otu00237	0	0	0	0.168919	0	0	0	0	0	0	0	0	0.0844595	0.0844595	0	0.168919	0	0	0	0	0	0	0	0	0	0	0	0	0	0	0	0	0	0	0	0	0	0	0	0	0	0	0	0	0	0	0	0	0
Otu04629	0	0	0	0	0	0	0	0	0	0	0	0	0	0	0	0	0	0	0	0	0	0	0.0844595	0	0	0	0	0	0	0	0	0	0	0	0	0	0	0	0	0	0	0	0	0	0	0	0	0	0
Otu00200	0.0844595	0	0	0.0844595	0.168919	0	0	0.168919	0	0	0	0	0.253378	0	0	0	0	0	0	0	0	0	0	0	0	0	0	0	0	0	0	0	0	0	0	0	0	0	0	0	0	0	0	0	0	0	0	0	0
Otu04274	0	0	0	0	0	0	0	0	0	0	0	0	0	0	0	0	0	0	0.0844595	0	0	0	0.0844595	0	0	0	0	0	0	0	0	0	0	0	0	0	0	0	0	0	0	0	0	0	0	0	0	0	0
Otu00767	0	0	0	0	0	0	0	0	0	0	0	0.0844595	0	0	0	0	0	0	0	0	0	0	0	0	0	0	0	0	0	0	0	0	0	0.0844595	0	0	0	0	0	0	0	0	0	0	0	0	0	0	0
Otu00172	0.0844595	0	0	0	0	0	0	0	0	0	0	0.0844595	0	0	0	0.506757	0	0	0	0	0	0	0	0	0	0	0	0	0	0	0	0	0	0	0	0	0	0	0	0	0	0	0	0	0	0	0	0	0
Otu01396	0	0	0	0	0	0	0	0	0	0	0	0.0844595	0	0	0	0	0	0	0	0	0	0	0	0	0	0	0	0	0	0	0	0	0	0	0	0	0	0	0	0	0	0	0	0	0	0	0	0	0
Otu00229	0	0.0844595	0	0	0	0	0	0	0	0	0.0844595	1.01351	0.253378	0.0844595	0	0.253378	0	0	0	0	0	0	0	0	0	0	0	0	0.0844595	0	0	0	0	0	0	0	0	0	0	0	0	0	0	0	0	0	0	0	0
Otu01487	0	0	0	0.0844595	0.253378	0	0	0	0	0	0	0	0	0	0	1.68919	0	0	0	0	0	0	0	0	0	0	0	0	0	0	0	0	0	0	0	0	0	0	0	0	0	0	0	0	0	0	0	0	0
Otu01667	0	0	0	0	0.168919	0	0	0	0	0	0	0	0	0	0	0.0844595	0	0	0	0	0	0	0	0	0	0	0	0	0	0	0	0	0	0	0	0	0	0	0	0	0	0	0	0	0	0	0	0	0
Otu03569	0	0	0	0	0	0	0	0	0	0	0	0	0	0.0844595	0	0	0	0.929054	0	0	0	0	0.422297	0	0	0	0	0	0	0	0	0	0	0	0	0	0.168919	0	0	0	0	0	0.0844595	0	0	0	0	0	0
Otu01404	0	0	0	0	0.0844595	0	0	0	0	0	0	0	0	0	0	0	0	0	0	0	0	0	0	0	0	0	0	0	0	0	0	0	0	0	0	0	0	0	0	0	0	0	0	0	0	0	0	0	0
Otu00050	0.168919	0	0	1.01351	0.168919	0	0.0844595	0.253378	0	0	0	0.0844595	0	0.168919	0	1.43581	0	0	0	0	0	0	0	0	0	0	0	0	0.760135	0	0	0	0	0	0	0	0	0	0	0	0	0	0	0	0	0	0	0	0
Otu00186	0	0	0	0	0	0	0	0	0	0	0	0	0	0	0	0.253378	0	0	0	0	0	0	0	0	0	0	0	0	0	0	0	0	0	0	0	0	0	0	0	0	0	0	0	0	0	0	0	0	0
Otu05138	0	0	0	0	0	0	0	0	0	0	0	0	0.168919	0	0	0.0844595	0	0	0	0	0	0	0	0	0	0	0	0	0	0	0	0	0	0	0	0	0	0	0	0	0	0	0	0	0	0	0	0	0
Otu00741	0	0	0	0	0.0844595	0	0	0	0	0	0	0.0844595	0	0.0844595	0	0.0844595	0	0	0	0	0	0	0	0	0	0	0	0	0.422297	0	0	0	0	0	0.0844595	0	0	0	0	0	0	0	0	0	0	0	0	0	0
Otu06549	0	0	0	0	0	0	0	0	0	0	0	0.168919	0	0	0	0	0	0	0	0	0	0	0	0	0	0	0	0	0	0	0	0	0	0	0	0	0	0	0	0	0	0	0	0	0	0	0	0	0
Otu01930	0	0	0	0	0.0844595	0	0	0	0	0	0	0	0	0	0	0	0	0	0	0	0	0	0	0	0	0	0	0	0	0	0	0	0	0	0	0	0	0	0	0	0	0	0	0	0	0	0	0	0
Otu01286	0	0	0	0.253378	0.0844595	0	0	0	0	0	0	0.0844595	0.0844595	0.168919	0	0.0844595	0	0	0	0	0	0	0	0	0	0	0	0	0.0844595	0	0	0	0.0844595	0	0.0844595	0	0	0	0	0	0	0	0	0	0	0	0	0	0
Otu00840	0	0	0	0	0	0	0	0	0	0	0	0	0	0	0	0.0844595	0	0	0	0	0	0	0	0	0	0	0	0	0	0	0	0	0	0	0	0	0	0	0	0	0	0	0	0	0	0	0	0	0
Otu01594	0	0	0	0	0	0	0	0	0	0	0	0	0	0.0844595	0	0	0	0	0	0	0	0	0	0	0	0	0	0	0	0	0	0	0	0	0	0	0	0	0	0	0	0	0	0	0	0	0	0	0
Otu06505	0	0	0	0	0	0	0	0	0	0	0	0	0	0	0	0	0	0	0	0	0	0	0	0	0	0	0	0	0	0	0	0	0	0	0	0	0.0844595	0	0	0	0	0	0	0	0	0	0	0	0
Otu02421	0	0	0	0	0	0	0	0	0	0	0	0.0844595	0	0	0	0	0.506757	4.30743	0	0	0.253378	0	6.84122	0	0	0	0	0	0.591216	0.0844595	0	0	0	0	0.0844595	0	0.844595	0	0	0	0	0	0	0	0	0	0	0	0
Otu00343	0	0	0	0.591216	0.168919	0	0	0.0844595	0	0	0	1.26689	0.0844595	0	0	0.591216	0	0	0	0	0	0	0	0	0	0	0	0	0.0844595	0	0	0	0	0	0	0	0.0844595	0	0	0	0	0	0	0	0	0	0	0	0
Otu00808	0	0	0	0.591216	0.253378	0	0.0844595	0	0	0	0	0.253378	0.0844595	0	0	0.253378	0	0	0	0	0	0	0	0	0	0	0	0	0	0	0	0	0	0	0	0	0	0	0	0	0	0	0	0	0	0	0	0	0
Otu03575	0	0	0	0	0	0	0	0	0	0	0	0.0844595	0	0	0	0	0	0.168919	0	0	0	0	1.01351	0	0	0	0	0	0	0	0	0	0	0	0	0	0	0	0	0	0	0	0	0	0	0	0	0	0
Otu01249	0	0	0.0844595	0	0	0	0	0	0	0	0	0	0	0	0	0.591216	0	0	0	0	0	0	0.168919	0	0	0	0	0	0	0	0	0	0	0	0	0	0.0844595	0	0	0	0	0	0	0	0	0	0	0	0
Otu03565	0	0	0	0	0	0	0	0	0	0	0	0.0844595	0	0	0	0	0	0.168919	0	0	0	0	0.591216	0	0	0	0	0	0	0	0	0	0	0	0	0	0.0844595	0	0	0	0	0	0	0	0	0	0	0	0
Otu01821	0	0	0	0.0844595	0.0844595	0	0	0	0	0	0	0	0	0	0	0.168919	0	0.253378	0.0844595	0	0	0	0.0844595	0	0	0	0	0	0	0	0	0	0	0	0	0	0	0	0	0	0	0	0	0	0	0	0	0	0
Otu00566	0	0	0	0.0844595	0	0	0	0.253378	0	0	0	0.253378	0	0	0	0.0844595	0	0	0	0	0	0	0	0	0	0	0	0	0	0	0	0	0	0	0	0	0	0	0	0	0	0	0	0	0	0	0	0	0
Otu01246	0	0.0844595	0	0	0.422297	0	0	0	0	0	0	0.0844595	0	0	0	0	0	0	0	0	0	0	0	0	0	0	0	0	0	0	0	0	0	0	0	0	0	0	0	0	0	0	0	0	0	0	0	0	0
Otu00824	0	0	0	0.0844595	0	0	0	0.0844595	0	0	0	0	0.0844595	0	0	0.0844595	0	0	0	0	0	0	0	0	0	0	0	0	0	0	0	0	0	0	0	0	0.168919	0	0	0	0	0	0	0	0	0	0	0	0
Otu03571	0	0	0	0	0	0	0	0	0	0	0	0	0	0	0	0	0	0.168919	0	0	0	0	0.253378	0	0	0	0	0	0	0	0	0	0	0	0	0	0	0	0	0	0	0	0	0	0	0	0	0	0
Otu01429	0	0	0	0	0	0	0	0	0	0	0	0	0.337838	0	0	0	0	0	0	0	0	0	0	0	0	0	0	0	0	0	0	0	0	0	0	0	0	0	0	0	0	0	0	0	0	0	0	0	0
Otu01847	0	0	0	0.0844595	0.168919	0	0	0	0	0	0	0	0	0	0	0	0	0	0	0	0	0	0.0844595	0	0	0	0	0	0	0	0	0	0	0	0	0	0	0	0	0	0	0	0	0	0	0	0	0	0
Otu00647	0	0	0	0.168919	0	0	0	0.0844595	0	0	0	0	0	0	0	0	0	0	0	0	0	0	0	0	0	0	0	0	0	0	0	0	0	0	0	0	0	0	0	0	0	0	0	0	0	0	0	0	0
Otu03576	0	0	0	0	0	0	0	0	0	0	0	0	0	0	0	0	0	0	0	0	0	0	0.253378	0	0	0	0	0	0	0	0	0	0	0	0	0	0	0	0	0	0	0	0	0	0	0	0	0	0
Otu00408	0	0	0	0	0	0	0	0.0844595	0	0	0	0	0	0	0	0	0	0	0	0	0	0	0	0	0	0	0	0	0	0	0	0	0	0	0	0	0	0	0	0	0	0	0	0	0	0	0	0	0
Otu00807	0	0	0	0	0	0	0	0.0844595	0	0	0	0	0	0	0	0.0844595	0	0	0	0	0	0	0	0	0	0	0	0	0	0	0	0	0	0	0	0	0	0	0	0	0	0	0	0	0	0	0	0	0
Otu01793	0	0	0	0.0844595	0	0	0	0	0	0	0	0	0	0	0	0.0844595	0	0	0	0	0	0	0	0	0	0	0	0	0	0	0	0	0	0	0	0	0	0	0	0	0	0	0	0	0	0	0	0	0
Otu01798	0	0	0	0.0844595	0	0	0	0	0	0	0	0	0	0	0	0	0	0	0	0	0	0	0.0844595	0	0	0	0	0	0	0	0	0	0	0	0	0	0	0	0	0	0	0	0	0	0	0	0	0	0
Otu02096	0	0	0	0	0	0	0	0	0	0	0	0	0	0	0	0.168919	0	0	0	0	0	0	0	0	0	0	0	0	0	0	0	0	0	0	0	0	0	0	0	0	0	0	0	0	0	0	0	0	0
Otu03354	0	0	0	0	0	0	0	0	0	0	0	0	0	0	0	0	0.168919	0	0	0	0	0	0	0	0	0	0	0	0	0	0	0	0	0	0	0	0	0	0	0	0	0	0	0	0	0	0	0	0
Otu03741	0	0	0	0	0	0	0	0	0	0	0	0	0	0	0	0	0	0.0844595	0	0	0	0	0.0844595	0	0	0	0	0	0	0	0	0	0	0	0	0	0	0	0	0	0	0	0	0	0	0	0	0	0
Otu03742	0	0	0	0	0	0	0	0	0	0	0	0	0	0	0	0	0	0	0	0	0	0	0.0844595	0	0	0	0	0	0.0844595	0	0	0	0	0	0	0	0	0	0	0	0	0	0	0	0	0	0	0	0
Otu03755	0	0	0	0	0	0	0	0	0	0	0	0	0	0	0	0	0	0.0844595	0	0	0	0	0.0844595	0	0	0	0	0	0	0	0	0	0	0	0	0	0	0	0	0	0	0	0	0	0	0	0	0	0
Otu03944	0	0	0	0	0	0	0	0	0	0	0	0	0	0	0	0	0	0.0844595	0	0	0	0	0	0	0	0	0	0	0.0844595	0	0	0	0	0	0	0	0	0	0	0	0	0	0	0	0	0	0	0	0
Otu04594	0	0	0	0	0	0	0	0	0	0	0	0	0	0	0	0	0	0	0	0	0	0	0.168919	0	0	0	0	0	0	0	0	0	0	0	0	0	0	0	0	0	0	0	0	0	0	0	0	0	0
Otu04607	0	0	0	0	0	0	0	0	0	0	0	0	0	0	0	0	0	0	0	0	0	0	0.168919	0	0	0	0	0	0	0	0	0	0	0	0	0	0	0	0	0	0	0	0	0	0	0	0	0	0
Otu06681	0	0	0	0	0	0	0	0	0	0	0	0	0.168919	0	0	0	0	0	0	0	0	0	0	0	0	0	0	0	0	0	0	0	0	0	0	0	0	0	0	0	0	0	0	0	0	0	0	0	0
Otu09667	0	0	0	0	0	0	0	0	0	0	0	0	0	0	0	0	0	0	0	0	0	0	0	0	0	0	0	0	0	0	0	0	0	0	0	0	0	0	0	0	0	0	0	0	0	0	0	0	0
Otu00736	0	0	0	0	0	0	0	0	0	0	0	0	0	0	0	0	0	0	0	0	0	0	0	0	0	0	0	0	0.0844595	0	0	0	0	0	0	0	0	0	0	0	0	0	0	0	0	0	0	0	0
Otu01221	0	0.0844595	0	0	0	0	0	0	0	0	0	0	0	0	0	0	0	0	0	0	0	0	0	0	0	0	0	0	0	0	0	0	0	0	0	0	0	0	0	0	0	0	0	0	0	0	0	0	0
Otu01234	0	0.0844595	0	0	0	0	0	0	0	0	0	0	0	0	0	0	0	0	0	0	0	0	0	0	0	0	0	0	0	0	0	0	0	0	0	0	0	0	0	0	0	0	0	0	0	0	0	0	0
Otu01425	0	0	0	0.0844595	0	0	0	0	0	0	0	0	0	0	0	0	0	0	0	0	0	0	0	0	0	0	0	0	0	0	0	0	0	0	0	0	0	0	0	0	0	0	0	0	0	0	0	0	0
Otu01530	0	0	0	0.0844595	0	0	0	0	0	0	0	0	0	0	0	0	0	0	0	0	0	0	0	0	0	0	0	0	0	0	0	0	0	0	0	0	0	0	0	0	0	0	0	0	0	0	0	0	0
Otu01750	0	0	0	0	0	0	0	0	0	0	0	0.0844595	0	0	0	0	0	0	0	0	0	0	0	0	0	0	0	0	0	0	0	0	0	0	0	0	0	0	0	0	0	0	0	0	0	0	0	0	0
Otu01772	0	0	0	0.0844595	0	0	0	0	0	0	0	0	0	0	0	0	0	0	0	0	0	0	0	0	0	0	0	0	0	0	0	0	0	0	0	0	0	0	0	0	0	0	0	0	0	0	0	0	0
Otu01778	0	0	0	0.0844595	0	0	0	0	0	0	0	0	0	0	0	0	0	0	0	0	0	0	0	0	0	0	0	0	0	0	0	0	0	0	0	0	0	0	0	0	0	0	0	0	0	0	0	0	0
Otu02028	0	0	0	0	0	0	0	0	0	0	0	0	0	0	0	0.0844595	0	0	0	0	0	0	0	0	0	0	0	0	0	0	0	0	0	0	0	0	0	0	0	0	0	0	0	0	0	0	0	0	0
Otu02075	0	0	0	0	0.0844595	0	0	0	0	0	0	0	0	0	0	0	0	0	0	0	0	0	0	0	0	0	0	0	0	0	0	0	0	0	0	0	0	0	0	0	0	0	0	0	0	0	0	0	0
Otu02194	0	0	0	0	0.0844595	0	0	0	0	0	0	0	0	0	0	0	0	0	0	0	0	0	0	0	0	0	0	0	0	0	0	0	0	0	0	0	0	0	0	0	0	0	0	0	0	0	0	0	0
Otu02330	0	0	0	0	0	0	0	0	0	0	0	0	0	0	0	0	0	0.0844595	0	0	0	0	0	0	0	0	0	0	0	0	0	0	0	0	0	0	0	0	0	0	0	0	0	0	0	0	0	0	0
Otu03469	0	0	0	0	0	0	0	0	0	0	0	0	0	0	0	0	0.0844595	0	0	0	0	0	0	0	0	0	0	0	0	0	0	0	0	0	0	0	0	0	0	0	0	0	0	0	0	0	0	0	0
Otu03531	0	0	0	0	0	0	0	0	0	0	0	0	0	0	0	0	0.0844595	0	0	0	0	0	0	0	0	0	0	0	0	0	0	0	0	0	0	0	0	0	0	0	0	0	0	0	0	0	0	0	0
Otu03625	0	0	0	0	0	0	0	0	0	0	0	0	0	0	0	0	0	0.0844595	0	0	0	0	0	0	0	0	0	0	0	0	0	0	0	0	0	0	0	0	0	0	0	0	0	0	0	0	0	0	0
Otu03643	0	0	0	0	0	0	0	0	0	0	0	0	0	0	0	0	0	0.0844595	0	0	0	0	0	0	0	0	0	0	0	0	0	0	0	0	0	0	0	0	0	0	0	0	0	0	0	0	0	0	0
Otu03686	0	0	0	0	0	0	0	0	0	0	0	0	0	0	0	0	0	0.0844595	0	0	0	0	0	0	0	0	0	0	0	0	0	0	0	0	0	0	0	0	0	0	0	0	0	0	0	0	0	0	0
Otu03695	0	0	0	0	0	0	0	0	0	0	0	0	0	0	0	0	0	0.0844595	0	0	0	0	0	0	0	0	0	0	0	0	0	0	0	0	0	0	0	0	0	0	0	0	0	0	0	0	0	0	0
Otu03846	0	0	0	0	0	0	0	0	0	0	0	0	0	0	0	0	0	0	0	0	0	0	0.0844595	0	0	0	0	0	0	0	0	0	0	0	0	0	0	0	0	0	0	0	0	0	0	0	0	0	0
Otu03880	0	0	0	0	0	0	0	0	0	0	0	0	0	0	0	0	0	0	0	0	0	0	0.0844595	0	0	0	0	0	0	0	0	0	0	0	0	0	0	0	0	0	0	0	0	0	0	0	0	0	0
Otu03915	0	0	0	0	0	0	0	0	0	0	0	0	0	0	0	0	0	0.0844595	0	0	0	0	0	0	0	0	0	0	0	0	0	0	0	0	0	0	0	0	0	0	0	0	0	0	0	0	0	0	0
Otu03939	0	0	0	0	0	0	0	0	0	0	0	0	0	0	0	0	0	0	0	0	0	0	0.0844595	0	0	0	0	0	0	0	0	0	0	0	0	0	0	0	0	0	0	0	0	0	0	0	0	0	0
Otu03965	0	0	0	0	0	0	0	0	0	0	0	0	0	0	0	0	0	0	0	0	0	0	0	0	0	0	0	0	0	0	0	0	0	0	0	0	0.0844595	0	0	0	0	0	0	0	0	0	0	0	0
Otu04656	0	0	0	0	0	0	0	0	0	0	0	0	0	0	0	0	0	0	0	0	0	0	0.0844595	0	0	0	0	0	0	0	0	0	0	0	0	0	0	0	0	0	0	0	0	0	0	0	0	0	0
Otu04827	0	0	0	0	0	0	0	0	0	0	0	0	0	0	0	0	0	0	0	0	0	0	0	0	0	0.0844595	0	0	0	0	0	0	0	0	0	0	0	0	0	0	0	0	0	0	0	0	0	0	0
Otu05618	0	0	0	0	0	0	0	0	0	0	0	0	0	0	0	0	0	0	0	0	0	0	0	0	0	0	0	0	0	0	0	0.0844595	0	0	0	0	0	0	0	0	0	0	0	0	0	0	0	0	0
Otu06597	0	0	0	0	0	0	0	0	0	0	0	0	0.0844595	0	0	0	0	0	0	0	0	0	0	0	0	0	0	0	0	0	0	0	0	0	0	0	0	0	0	0	0	0	0	0	0	0	0	0	0
Otu06598	0	0	0	0	0	0	0	0	0	0	0	0	0.0844595	0	0	0	0	0	0	0	0	0	0	0	0	0	0	0	0	0	0	0	0	0	0	0	0	0	0	0	0	0	0	0	0	0	0	0	0
Otu06896	0	0	0	0	0	0	0	0	0	0	0	0	0	0	0	0.0844595	0	0	0	0	0	0	0	0	0	0	0	0	0	0	0	0	0	0	0	0	0	0	0	0	0	0	0	0	0	0	0	0	0
Otu06935	0	0	0	0	0	0	0	0	0	0	0	0	0	0	0	0.0844595	0	0	0	0	0	0	0	0	0	0	0	0	0	0	0	0	0	0	0	0	0	0	0	0	0	0	0	0	0	0	0	0	0
Otu06983	0	0	0	0	0	0	0	0	0	0	0	0	0	0	0	0.0844595	0	0	0	0	0	0	0	0	0	0	0	0	0	0	0	0	0	0	0	0	0	0	0	0	0	0	0	0	0	0	0	0	0
Otu03797	0	0	0	0	0	0	0	0	0	0	0	0	0	0	0	0	0	0.0844595	0	0	0	0	0	0	0	0	0	0	0	0	0	0	0	0	0	0	0	0	0	0	0	0	0	0	0	0	0	0	0
Otu03593	0	0	0	0	0	0	0	0	0	0	0	0	0	0	0	0	0	0.0844595	0	0	0	0	0.0844595	0	0	0	0	0	0	0	0	0	0	0	0	0	0	0	0	0	0	0	0	0	0	0	0	0	0
Otu01443	0	0	0	0.0844595	0	0	0	0	0	0	0	0	0	0	0	0	0	0	0	0	0	0	0	0	0	0	0	0	0	0	0	0	0	0	0	0	0	0	0	0	0	0	0	0	0	0	0	0	0
Otu02007	0	0	0	0	0	0	0	0	0	0	0	0.0844595	0	0	0	0	0	0	0	0	0	0	0	0	0	0	0	0	0	0	0	0	0	0	0	0	0	0	0	0	0	0	0	0	0	0	0	0	0
Otu01531	0	0	0	0.0844595	0	0	0	0	0	0	0	0.0844595	0	0	0	0.0844595	0	0	0	0	0	0	0	0	0	0	0	0	0	0	0	0	0	0	0	0	0	0	0	0	0	0	0	0	0	0	0	0	0
Otu03606	0	0	0	0	0	0	0	0	0	0	0	0	0	0	0	0	0	0.0844595	0	0	0	0	0	0	0	0	0	0	0	0	0	0	0	0	0	0	0	0	0	0	0	0	0	0	0	0	0	0	0
Otu00849	0	0	0	0	0	0	0	0.0844595	0	0	0	0	0	0	0	0	0	0	0	0	0	0	0	0	0	0	0	0	0	0	0	0	0	0	0	0	0	0	0	0	0	0	0	0	0	0	0	0	0
Otu01545	0	0	0	0.0844595	0	0	0	0	0	0	0	0	0	0	0	0	0	0	0	0	0	0	0	0	0	0	0	0	0	0	0	0	0	0	0	0	0	0	0	0	0	0	0	0	0	0	0	0	0
Otu03284	0	0	0	0	0	0	0	0	0	0	0	0	0	0	0	0	0.0844595	0	0	0	0	0	0	0	0	0	0	0	0	0	0	0	0	0	0	0	0	0	0	0	0	0	0	0	0	0	0	0	0
Otu01719	0	0	0	0	0	0	0	0	0	0	0	0	0	0	0	0.0844595	0	0.0844595	0	0	0	0	0	0	0	0	0	0	0	0	0	0	0	0	0	0	0	0	0	0	0	0	0	0	0	0	0	0	0
Otu06555	0	0	0	0	0	0	0	0	0	0	0	0.0844595	0	0	0	0	0	0	0	0	0	0	0	0	0	0	0	0	0	0	0	0	0	0	0	0	0	0	0	0	0	0	0	0	0	0	0	0	0
Otu08890	0	0	0	0	0	0	0	0	0	0	0	0	0	0	0	0	0	0	0	0	0	0	0	0	0	0	0	0	0	0	0	0	0	0	0	0	0	0	0	0	0	0	0	0	0	0	0	0	0
Otu03811	0	0	0	0	0	0	0	0	0	0	0	0	0	0	0	0	0	0.0844595	0	0	0	0	0	0	0	0	0	0	0	0	0	0	0	0	0	0	0	0	0	0	0	0	0	0	0	0	0	0	0
Otu06433	0	0	0	0	0	0	0	0	0	0	0	0	0	0	0	0	0	0	0	0	0	0	0	0	0	0	0	0	0	0	0	0	0	0	0	0	0.0844595	0	0	0	0	0	0	0	0	0	0	0	0
Otu03897	0	0	0	0	0	0	0	0	0	0	0	0	0	0	0	0	0	0.0844595	0	0	0	0	0	0	0	0	0	0	0	0	0	0	0	0	0	0	0	0	0	0	0	0	0	0	0	0	0	0	0
Otu06343	0	0	0	0	0	0	0	0	0	0	0	0	0	0	0	0	0	0	0	0	0	0	0	0	0	0	0	0	0	0	0	0	0	0	0	0	0.168919	0	0	0	0	0	0	0	0	0	0	0	0
Otu03922	0	0	0	0	0	0	0	0	0	0	0	0	0	0	0	0	0	0.0844595	0	0	0	0	0	0	0	0	0	0	0	0	0	0	0	0	0	0	0	0	0	0	0	0	0	0	0	0	0	0	0
Otu01673	0	0	0	0	0	0	0	0	0	0	0	0.0844595	0	0	0	0	0	0	0	0	0	0	0	0	0	0	0	0	0	0	0	0	0	0	0	0	0	0	0	0	0	0	0	0	0	0	0	0	0
Otu02470	0	0	0	0	0	0.0844595	0	0	0	0	0	0	0	0	0	0	0	0	0	0	0	0	0	0	0	0	0	0	0	0	0	0	0	0	0	0	0	0	0	0	0	0	0	0	0	0	0	0	0
Otu03884	0	0	0	0	0	0	0	0	0	0	0	0	0	0	0	0	0	0.0844595	0	0	0	0	0	0	0	0	0	0	0	0	0	0	0	0	0	0	0	0	0	0	0	0	0	0	0	0	0	0	0
Otu06912	0	0	0	0	0	0	0	0	0	0	0	0	0	0	0	0.0844595	0	0	0	0	0	0	0	0	0	0	0	0	0	0	0	0	0	0	0	0	0	0	0	0	0	0	0	0	0	0	0	0	0
Otu02549	0	0	0	0	0	0.0844595	0	0	0	0	0	0	0	0	0	0	0	0	0	0	0	0	0	0	0	0	0	0	0	0	0	0	0	0	0	0	0	0	0	0	0	0	0	0	0	0	0	0	0
Otu03592	0	0	0	0	0	0	0	0	0	0	0	0	0	0	0	0	0	0.0844595	0	0	0	0	0	0	0	0	0	0	0	0	0	0	0	0	0	0	0	0	0	0	0	0	0	0	0	0	0	0	0
Otu04642	0	0	0	0	0	0	0	0	0	0	0	0	0.0844595	0	0	0	0	0	0	0	0	0	0	0	0	0	0	0	0	0	0	0	0	0	0	0	0	0	0	0	0	0	0	0	0	0	0	0	0
Otu03758	0	0	0	0	0	0	0	0	0	0	0	0	0	0	0	0	0	0.0844595	0	0	0	0	0	0	0	0	0	0	0	0	0	0	0	0	0	0	0	0	0	0	0	0	0	0	0	0	0	0	0
Otu03577	0	0	0	0	0	0	0	0	0	0	0	0	0	0	0	0	0	0.253378	0	0	0	0	0	0	0	0	0	0	0	0	0	0	0	0	0	0	0	0	0	0	0	0	0	0	0	0	0	0	0
Otu00351	0	0	0	0	0.0844595	0	0	0	0	0	0	0	0	0	0	0	0	0	0	0	0	0	0	0	0	0	0	0	0	0	0	0	0	0	0	0	0	0	0	0	0	0	0	0	0	0	0	0	0
Otu04624	0	0	0	0	0	0	0	0	0	0	0	0	0	0	0	1.09797	0	0	0	0	0	0	0	0	0	0	0	0	0	0	0	0	0	0	0	0	0	0	0	0	0	0	0	0	0	0	0	0	0
Otu03233	0	0	0	0	0	0	0	0	0	0	0	0	0	0	0	0	0	0.0844595	0	0	0	0	0	0	0	0	0	0	0	0	0	0	0	0	0	0	0	0	0	0	0	0	0	0	0	0	0	0	0
Otu03772	0	0	0	0	0	0	0	0	0	0	0	0	0	0	0	0	0	0.0844595	0	0	0	0	0	0	0	0	0	0	0	0	0	0	0	0	0	0	0	0	0	0	0	0	0	0	0	0	0	0	0
Otu08892	0	0	0	0	0	0	0	0	0	0	0	0	0	0	0	0	0	0	0	0	0	0	0	0	0	0	0	0	0	0	0	0	0	0	0	0	0	0	0	0	0	0	0	0	0	0	0	0	0
Otu03305	0	0	0	0	0	0	0	0	0	0	0	0	0	0	0	0	0.0844595	0.844595	0	0	0	0	0.422297	0	0	0	0	0	0.0844595	0	0	0	0	0	0	0	0	0	0	0	0	0	0	0.0844595	0	0	0	0	0
Otu02332	0	0	0	0	0.0844595	0	0	0	0	0	0	0	0	0	0	0	0	0	0	0	0	0	0	0	0	0	0	0	0	0	0	0	0	0	0	0	0	0	0	0	0	0	0	0	0	0	0	0	0
Otu03518	0	0	0	0	0	0	0	0	0	0	0	0	0	0	0	0	0.0844595	0	0	0	0	0	0	0	0	0	0	0	0	0	0	0	0	0	0	0	0	0	0	0	0	0	0	0	0	0	0	0	0
Otu06728	0	0	0	0	0	0	0	0	0	0	0	0	0	0.0844595	0	0	0	0	0	0	0	0	0	0	0	0	0	0	0	0	0	0	0	0	0	0	0	0	0	0	0	0	0	0	0	0	0	0	0
Otu04661	0	0	0	0	0	0	0	0	0	0	0	0	0	0	0	0	0	0	0	0	0	0	0.0844595	0	0	0	0	0	0	0	0	0	0	0	0	0	0	0	0	0	0	0	0	0	0	0	0	0	0
Otu06430	0	0	0	0	0	0	0	0	0	0	0	0	0	0	0	0	0	0	0	0	0	0	0	0	0	0	0	0	0	0	0	0	0	0	0	0	0.0844595	0	0	0	0	0	0	0	0	0	0	0	0
Otu01646	0	0	0	0.0844595	0	0	0	0	0	0	0	0	0.168919	0	0	0.0844595	0	0	0	0	0	0	0	0	0	0	0	0	0	0	0	0	0	0	0	0	0	0	0	0	0	0	0	0	0	0	0	0	0
Otu03675	0	0	0	0	0	0	0	0	0	0	0	0	0	0	0	0	0	0	0	0	0	0	0.253378	0	0	0	0	0	0	0	0	0	0	0	0	0	0	0	0	0	0	0	0	0	0	0	0	0	0
Otu01197	0	0.0844595	0	0.0844595	0	0	0	0	0	0	0	0	0	0	0	0	0	0	0	0	0	0	0	0	0	0	0	0	0	0	0	0	0	0	0	0	0	0	0	0	0	0	0	0	0	0	0	0	0
Otu01742	0	0	0	0.0844595	0	0	0	0	0	0	0	0	0	0	0	0	0	0	0	0	0	0	0	0	0	0	0	0	0	0	0	0	0	0	0	0	0	0	0	0	0	0	0	0	0	0	0	0	0
Otu01858	0	0	0	0.0844595	0	0	0	0	0	0	0	0	0	0	0	0	0	0	0	0	0	0	0	0	0	0	0	0	0	0	0	0	0	0	0	0	0	0	0	0	0	0	0	0	0	0	0	0	0
Otu04623	0	0	0	0	0	0	0	0	0	0	0	0	0	0	0	0	0	0	0	0	0	0	0.0844595	0	0	0	0	0	0	0	0	0	0	0	0	0	0	0	0	0	0	0	0	0	0	0	0	0	0
Otu06375	0	0	0	0	0	0	0	0	0	0	0	0	0	0	0	0	0	0	0	0	0	0	0	0	0	0	0	0	0	0	0	0	0	0	0	0	0.0844595	0	0	0	0	0	0	0	0	0	0	0	0
Otu01331	0	0	0	0	0	0	0	0	0	0	0	0	0	0	0	0	0	0	0	0	0	0	0.0844595	0	0	0	0	0	0	0	0	0	0	0	0	0	0	0	0	0	0	0	0	0	0	0	0	0	0
Otu04655	0	0	0	0	0	0	0	0	0	0	0	0	0	0	0	0	0	0	0	0	0	0	0.0844595	0	0	0	0	0	0	0	0	0	0	0	0	0	0	0	0	0	0	0	0	0	0	0	0	0	0
Otu00450	0	0	0	0	0	0	0	0.0844595	0	0	0	0	0	0.0844595	0	0	0.337838	1.60473	0	0	0	0	4.22297	0.0844595	0	0	0	0	0.168919	0	0	0	0	0	0.0844595	0	1.18243	0	0	0	0	0	0	0	0	0	0	0	0
Otu00425	0	0	0	0	0	0.506757	0	0.168919	0	0	0	0	0	0	0	0	0.168919	1.18243	0	0	0	0	2.02703	0	0	0	0	0	0.844595	0	0	0	0	0	0.168919	0.0844595	0.168919	0	0	0	0	0	0	0	0	0	0	0	0
Otu03281	0	0	0	0	0	0	0	0	0	0	0	0	0	0.168919	0	0	0.253378	0.253378	0	0	0	0	1.09797	0	0	0	0	0	0.337838	0	0	0	0	0	0	0	0.168919	0	0	0	0	0	0	0	0	0	0	0	0
Otu00802	0	0	0	0	0	0.168919	0	0.0844595	0	0	0.0844595	0.0844595	0	0	0	0	0	0.253378	0.168919	0	0	0	0.0844595	0	0	0	0	0	0.0844595	0.0844595	0	0	0	0	0	0	0.0844595	0	0	0	0	0	0	0	0	0.0844595	0	0	0
Otu00057	0	0	0	0	0	0	0	0	0	0	0	0	0	0	0	0	0	0.168919	0	0	0	0	0.675676	0	0	0	0	0	0.422297	0	0	0	0	0	0	0	0	0	0	0	0	0	0	0	0	0	0	0	0
Otu00494	0	0	0	0	0	0.0844595	0	0.168919	0	0	0	0	0	0	0	0	0	0.0844595	0	0	0	0	0.168919	0	0	0	0	0	0	0	0	0	0	0	0	0	0.0844595	0	0	0	0	0	0	0	0	0	0	0	0
Otu04615	0	0	0	0	0	0	0	0	0	0	0	0	0	0	0	0	0	0	0	0	0	0	0	0	0	0	0	0	0	0	0	0	0	0	0	0	0	0	0	0	0.0844595	0	0	0	0.168919	0	0	0	0
Otu00533	0	0	0	0	0	0	0	0.0844595	0	0	0	0	0	0	0	0	0	0.168919	0.0844595	0	0	0	0.0844595	0	0	0	0	0	0	0	0	0	0	0	0	0	0	0	0	0	0	0	0	0	0	0	0	0	0
Otu04579	0	0	0	0	0	0	0	0	0	0	0	0	0	0	0	0	0	0	0	0	0	0	0.337838	0	0	0	0	0	0	0	0	0	0	0	0	0	0	0	0	0	0	0	0	0	0	0	0	0	0
Otu01631	0	0	0	0.0844595	0	0	0	0	0	0	0	0	0	0	0	0	0	0	0.0844595	0	0	0	0.0844595	0	0	0	0	0	0	0	0	0	0	0	0	0	0	0	0	0	0	0	0	0	0	0	0	0	0
Otu01448	0	0	0	0	0	0	0	0	0	0	0	0	0	0	0	0	0	0	0.168919	0	0	0	0	0	0	0	0	0	0	0	0	0	0	0	0	0	0	0	0	0	0	0	0	0	0	0	0	0	0
Otu01685	0	0	0	0.0844595	0	0	0	0	0	0	0	0.0844595	0	0	0	0	0	0	0	0	0	0	0	0	0	0	0	0	0	0	0	0	0	0	0	0	0	0	0	0	0	0	0	0	0	0	0	0	0
Otu02131	0	0	0	0	0	0	0	0	0	0	0	0	0	0	0	0	0.0844595	0	0	0	0	0	0	0	0	0	0	0	0	0	0	0	0	0	0	0	0.0844595	0	0	0	0	0	0	0	0	0	0	0	0
Otu02366	0	0	0	0	0	0	0	0	0	0	0	0	0	0	0	0	0	0.0844595	0	0	0	0	0	0	0	0	0	0	0	0	0	0	0	0	0	0	0.0844595	0	0	0	0	0	0	0	0	0	0	0	0
Otu02577	0	0	0	0	0	0	0	0	0	0	0	0	0	0	0	0	0	0.168919	0	0	0	0	0	0	0	0	0	0	0	0	0	0	0	0	0	0	0	0	0	0	0	0	0	0	0	0	0	0	0
Otu05919	0	0	0	0	0	0	0	0	0	0	0	0	0	0	0	0	0	0	0	0	0	0	0	0	0	0	0	0	0	0	0	0	0	0	0	0	0	0	0	0	0	0	0	0	0	0	0	0	0
Otu06212	0	0	0	0	0	0	0	0	0	0	0	0	0	0	0	0	0	0	0	0	0	0	0	0	0	0	0	0	0	0	0	0	0	0	0	0	0	0	0	0	0	0	0	0	0	0	0	0	0
Otu11046	0	0	0	0	0	0	0	0	0	0	0	0	0	0	0	0	0	0	0	0	0	0	0	0	0	0	0	0	0	0	0	0	0	0	0	0	0	0	0	0	0	0	0.168919	0	0	0	0	0	0
Otu00212	0.0844595	0	0	0	0	0	0	0	0	0	0	0	0	0	0	0	0	0	0	0	0	0	0	0	0	0	0	0	0	0	0	0	0	0	0	0	0	0	0	0	0	0	0	0	0	0	0	0	0
Otu01147	0	0	0	0	0	0	0	0	0	0	0	0	0	0	0	0	0	0	0	0	0	0	0.0844595	0	0	0	0	0	0	0	0	0	0	0	0	0	0	0	0	0	0	0	0	0	0	0	0	0	0
Otu01506	0	0	0	0	0	0	0	0	0	0	0	0	0.0844595	0	0	0	0	0	0	0	0	0	0	0	0	0	0	0	0	0	0	0	0	0	0	0	0	0	0	0	0	0	0	0	0	0	0	0	0
Otu03599	0	0	0	0	0	0	0	0	0	0	0	0	0	0	0	0	0	0.0844595	0	0	0	0	0	0	0	0	0	0	0	0	0	0	0	0	0	0	0	0	0	0	0	0	0	0	0	0	0	0	0
Otu03782	0	0	0	0	0	0	0	0	0	0	0	0	0	0	0	0	0	0.0844595	0	0	0	0	0	0	0	0	0	0	0	0	0	0	0	0	0	0	0	0	0	0	0	0	0	0	0	0	0	0	0
Otu03877	0	0	0	0	0	0	0	0	0	0	0	0	0	0	0	0	0	0.0844595	0	0	0	0	0	0	0	0	0	0	0	0	0	0	0	0	0	0	0	0	0	0	0	0	0	0	0	0	0	0	0
Otu03904	0	0	0	0	0	0	0	0	0	0	0	0	0	0	0	0	0	0.0844595	0	0	0	0	0	0	0	0	0	0	0	0	0	0	0	0	0	0	0	0	0	0	0	0	0	0	0	0	0	0	0
Otu04585	0	0	0	0	0	0	0	0	0	0	0	0	0	0	0	0	0	0	0	0	0	0	0	0	0	0	0	0	0	0	0	0	0	0	0	0	0.0844595	0	0	0	0	0	0	0	0	0	0	0	0
Otu05022	0	0	0	0	0	0	0	0	0	0	0	0	0	0	0	0	0	0	0	0	0	0	0	0	0	0	0	0	0.0844595	0	0	0	0	0	0	0	0	0	0	0	0	0	0	0	0	0	0	0	0
Otu01681	0	0	0	0.0844595	0	0	0	0	0	0	0	0	0	0	0	0	0	0	0	0	0	0	0	0	0	0	0	0	0	0	0	0	0	0	0	0	0	0	0	0	0	0	0	0	0	0	0	0	0
Otu03629	0	0	0	0	0	0	0	0	0	0	0	0	0	0	0	0	0	0.0844595	0	0	0	0	0.0844595	0	0	0	0	0	0	0	0	0	0	0	0	0	0	0	0	0	0	0	0	0	0	0	0	0	0
Otu03138	0	0	0	0	0	0	0	0	0	0	0.0844595	0	0	0	0	0	0	0	0	0	0	0	0	0	0	0	0	0	0	0	0	0	0	0	0	0	0	0	0	0	0	0	0	0	0	0	0	0	0
Otu03676	0	0	0	0	0	0	0	0	0	0	0	0	0	0	0	0	0	0.0844595	0	0	0	0	0	0	0	0	0	0	0	0	0	0	0	0	0	0	0	0	0	0	0	0	0	0	0	0	0	0	0
Otu06050	0	0	0	0	0	0	0	0	0	0	0	0	0	0	0	0	0	0	0	0	0	0	0	0	0	0	0	0	0	0	0	0	0	0	0.0844595	0	0	0	0	0	0	0	0	0	0	0	0	0	0
Otu08226	0	0	0	0	0	0	0	0	0	0	0	0	0	0	0	0	0	0	0	0	0	0	0	0	0	0	0	0	0	0	0	0	0	0	0	0	0	0	0	0.168919	0	0	0	0	0	0	0	0	0
Otu09858	0	0	0	0	0	0	0	0	0	0	0	0	0	0	0	0	0	0	0	0	0	0	0	0	0	0	0	0	0	0	0	0	0	0	0	0	0	0	0	0	0	0	0	0	0	0	0	0	0
Otu03201	0	0	0	0	0	0	0	0	0	0	0.0844595	0	0	0	0	0	0	0	0	0	0	0	0	0	0	0	0	0	0	0	0	0	0	0	0	0	0	0	0	0	0	0	0	0	0	0	0	0	0
Otu07265	0	0	0	0	0	0	0	0	0	0	0	0	0	0	0	0	0	0	0	0	0	0	0	0	0	0	0	0	0	0	0	0	0	0	0	0	0	0	0	0	0	0	0	0	0.168919	0	0	0	0
Otu01720	0	0	0	0	0	0	0	0	0	0	0	0	0	0	0	0	0	0	0	0	0	0	0	0	0	0	0	0	0	0	0	0	0	0	0	0.0844595	0	0	0	0	0	0	0	0	0	0	0	0	0
Otu04000	0	0	0	0	0	0	0	0	0	0	0	0	0	0	0	0	0	0.0844595	0	0	0	0	0	0	0	0	0	0	0	0	0	0	0	0	0	0	0	0	0	0	0	0	0	0	0	0	0	0	0
Otu05941	0	0	0	0	0	0	0	0	0	0	0	0	0	0	0	0	0	0	0	0	0	0	0	0	0	0	0	0	0	0	0	0	0	0.0844595	0	0	0	0	0	0	0	0	0	0	0	0	0	0	0
Otu02377	0	0	0	0	0	0.0844595	0	0	0	0	0	0	0	0	0	0	0	0	0	0	0	0	0	0	0	0	0	0	0	0	0	0	0	0	0	0	0	0	0	0	0	0	0	0	0	0	0	0	0
Otu01384	0	0	0	0.422297	0	0	0	0	0	0	0	0	0	0	0	0	0	0	0	0	0	0	0	0	0	0	0	0	0.0844595	0	0	0	0	0	0	0	0	0	0	0	0	0	0	0	0	0	0	0	0
Otu03380	0	0	0	0	0	0	0	0	0	0	0	0	0	0	0	0	0	0	0	0	0	0	0	0	0	0	0	0	0.0844595	0	0	0	0	0	0	0	0	0	0	0	0	0	0	0	0	0	0	0	0
Otu03671	0	0	0	0	0	0	0	0	0	0	0	0	0	0	0	0	0	0.0844595	0	0	0	0	0	0	0	0	0	0	0	0	0	0	0	0	0	0	0	0	0	0	0	0	0	0	0	0	0	0	0
Otu01388	0	0	0	0.168919	0	0	0	0	0	0	0	0	0.0844595	0	0	0.253378	0	0	0	0	0	0	0	0	0	0	0	0	0	0	0	0	0	0	0	0	0	0	0	0	0	0	0	0	0	0	0	0	0
519
[truncated: 41 more columns]
